# Supplementary material for: Positive health effects of the natural outdoor environment in typical populations in different regions in Europe (PHENOTYPE): a study programme protocol
Source: PubMed Central journal article supplement — BMJ Open. 2014 Apr 16;4(4):e004951. doi: 10.1136/bmjopen-2014-004951 (PMC3996820; doi:10.1136/bmjopen-2014-004951), 2014-04-16
Supplement: bmjopen-2014-004951.draft_revisions.pdf [file bmjopen-2014-004951.draft_revisions.pdf]

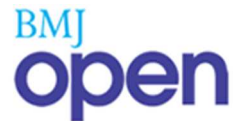

**POSITIVE HEALTH EFFECTS OF THE NATURAL OUTDOOR ENVIRONMENT IN TYPICAL POPULATIONS IN DIFFERENT REGIONS IN EUROPE (PHENOTYPE)**

|                               |                                                                                                                                                                                                                                                                                                                                                                                                                                                                                                                                                                                                                                                                                                                                                                                                                                                                                                                                                                                                                                                                                                                                                                                                                                                                                                                                                                                                                                                                                                                                                                                                                                                                                                                                                                                                                                                                                                                                                                                                                                                                                                                                                                                                                                                                                                                                                                                                                                    |
|-------------------------------|------------------------------------------------------------------------------------------------------------------------------------------------------------------------------------------------------------------------------------------------------------------------------------------------------------------------------------------------------------------------------------------------------------------------------------------------------------------------------------------------------------------------------------------------------------------------------------------------------------------------------------------------------------------------------------------------------------------------------------------------------------------------------------------------------------------------------------------------------------------------------------------------------------------------------------------------------------------------------------------------------------------------------------------------------------------------------------------------------------------------------------------------------------------------------------------------------------------------------------------------------------------------------------------------------------------------------------------------------------------------------------------------------------------------------------------------------------------------------------------------------------------------------------------------------------------------------------------------------------------------------------------------------------------------------------------------------------------------------------------------------------------------------------------------------------------------------------------------------------------------------------------------------------------------------------------------------------------------------------------------------------------------------------------------------------------------------------------------------------------------------------------------------------------------------------------------------------------------------------------------------------------------------------------------------------------------------------------------------------------------------------------------------------------------------------|
| Journal:                      | <i>BMJ Open</i>                                                                                                                                                                                                                                                                                                                                                                                                                                                                                                                                                                                                                                                                                                                                                                                                                                                                                                                                                                                                                                                                                                                                                                                                                                                                                                                                                                                                                                                                                                                                                                                                                                                                                                                                                                                                                                                                                                                                                                                                                                                                                                                                                                                                                                                                                                                                                                                                                    |
| Manuscript ID:                | bmjopen-2014-004951                                                                                                                                                                                                                                                                                                                                                                                                                                                                                                                                                                                                                                                                                                                                                                                                                                                                                                                                                                                                                                                                                                                                                                                                                                                                                                                                                                                                                                                                                                                                                                                                                                                                                                                                                                                                                                                                                                                                                                                                                                                                                                                                                                                                                                                                                                                                                                                                                |
| Article Type:                 | Research                                                                                                                                                                                                                                                                                                                                                                                                                                                                                                                                                                                                                                                                                                                                                                                                                                                                                                                                                                                                                                                                                                                                                                                                                                                                                                                                                                                                                                                                                                                                                                                                                                                                                                                                                                                                                                                                                                                                                                                                                                                                                                                                                                                                                                                                                                                                                                                                                           |
| Date Submitted by the Author: | 29-Jan-2014                                                                                                                                                                                                                                                                                                                                                                                                                                                                                                                                                                                                                                                                                                                                                                                                                                                                                                                                                                                                                                                                                                                                                                                                                                                                                                                                                                                                                                                                                                                                                                                                                                                                                                                                                                                                                                                                                                                                                                                                                                                                                                                                                                                                                                                                                                                                                                                                                        |
| Complete List of Authors:     | <p>Nieuwenhuijsen, Mark; Center for Research in Environmental Epidemiology (CREAL) - Universitat Pompeu Fabra (UPF), Research Professor in Environmental Epidemiol; Consortium for Biomedical Research in Epidemiology and Public Health (CIBER en Epidemiología y Salud Pública-CIBERESP),</p> <p>Kruize, Hanneke; National Institute for Public Health and the Environment,, Centre of Environmental Health Research</p> <p>Gidlow, Christopher; CSHER,</p> <p>Andrusaityte, Sandra; Vytauto Didziojo Universitetas,</p> <p>Anto, Joseph; /; Center for Research in Environmental Epidemiology (CREAL) - Universitat Pompeu Fabra (UPF) - IMIM (Hospital del Mar Medical Research Institute) - CIBERESP,</p> <p>Basagana, Xavier; Center for Research in Environmental Epidemiology (CREAL) - Universitat Pompeu Fabra (UPF), Research Professor in Environmental Epidemiol; Consortium for Biomedical Research in Epidemiology and Public Health (CIBER en Epidemiología y Salud Pública-CIBERESP),</p> <p>Cirach, Marta; Center for Research in Environmental Epidemiology (CREAL) - Universitat Pompeu Fabra (UPF), Research Professor in Environmental Epidemiol; Consortium for Biomedical Research in Epidemiology and Public Health (CIBER en Epidemiología y Salud Pública-CIBERESP),</p> <p>Dadvand, Payam; Center for Research in Environmental Epidemiology (CREAL) - Universitat Pompeu Fabra (UPF), Research Professor in Environmental Epidemiol; Consortium for Biomedical Research in Epidemiology and Public Health (CIBER en Epidemiología y Salud Pública-CIBERESP),</p> <p>Danileviciute, Asta; Vytauto Didziojo Universitetas,</p> <p>Donaire-Gonzalez, David; Center for Research in Environmental Epidemiology (CREAL) - Universitat Pompeu Fabra (UPF), Research Professor in Environmental Epidemiol; Consortium for Biomedical Research in Epidemiology and Public Health (CIBER en Epidemiología y Salud Pública-CIBERESP),</p> <p>Garcia-Aymerich, Judith; Center for Research in Environmental Epidemiology (CREAL) - Universitat Pompeu Fabra (UPF), Research Professor in Environmental Epidemiol; Consortium for Biomedical Research in Epidemiology and Public Health (CIBER en Epidemiología y Salud Pública-CIBERESP),</p> <p>Jerrett, Michael; UCB, University of California,</p> <p>Jones, Marc; CSHER,</p> <p>Julvez, Jordi; Center for Research in Environmental Epidemiology (CREAL)</p> |

|                                 |                                                                                                                                                                                                                                                                                                                                                                                                                                                                                                                                                                                                                                                                                                                                                                                                                                                                                                                                                                                                                                                        |
|---------------------------------|--------------------------------------------------------------------------------------------------------------------------------------------------------------------------------------------------------------------------------------------------------------------------------------------------------------------------------------------------------------------------------------------------------------------------------------------------------------------------------------------------------------------------------------------------------------------------------------------------------------------------------------------------------------------------------------------------------------------------------------------------------------------------------------------------------------------------------------------------------------------------------------------------------------------------------------------------------------------------------------------------------------------------------------------------------|
|                                 | - Universitat Pompeu Fabra (UPF), Research Professor in Environmental Epidemiol; Consortium for Biomedical Research in Epidemiology and Public Health (CIBER en Epidemiología y Salud Pública-CIBERESP), Van Kempen, Elise; National Institute for Public Health and the Environment, Centre for Environmental Health Research van Kamp, Irene; RIVM, cMGO Maas, Jolanda; VUMC, Seto, Edmund; UCB, University of California, Smith, Graham; CSHER, Triguero, Margarita; Center for Research in Environmental Epidemiology (CREAL) - Universitat Pompeu Fabra (UPF), Research Professor in Environmental Epidemiol; Consortium for Biomedical Research in Epidemiology and Public Health (CIBER en Epidemiología y Salud Pública-CIBERESP), Wendel-Vos, Wanda; National Institute for Public Health and the Environment, Wright, John; Bradford Hospital Trust, Zufferey, Joris; University of Geneva, van den Hazel, Peter; VGGM, Lawrence, Roderick; University of Geneva, Grazuleviciene, Regina; Vytautas Magnus University, Environmental Sciences |
| <b>Primary Subject Heading</b>: | Public health                                                                                                                                                                                                                                                                                                                                                                                                                                                                                                                                                                                                                                                                                                                                                                                                                                                                                                                                                                                                                                          |
| Secondary Subject Heading:      | Epidemiology, Public health, Occupational and environmental medicine                                                                                                                                                                                                                                                                                                                                                                                                                                                                                                                                                                                                                                                                                                                                                                                                                                                                                                                                                                                   |
| Keywords:                       | Green space, Blue space, Health, Well being, Physical activity                                                                                                                                                                                                                                                                                                                                                                                                                                                                                                                                                                                                                                                                                                                                                                                                                                                                                                                                                                                         |
|                                 |                                                                                                                                                                                                                                                                                                                                                                                                                                                                                                                                                                                                                                                                                                                                                                                                                                                                                                                                                                                                                                                        |

SCHOLARONE™  
Manuscripts

Peer Review Only

1  
2  
3 **POSITIVE HEALTH EFFECTS OF THE NATURAL OUTDOOR ENVIRONMENT**  
4 **IN TYPICAL POPULATIONS IN DIFFERENT REGIONS IN EUROPE**  
5 **(PHENOTYPE)**  
6  
7  
8

9 Mark J Nieuwenhuijsen<sup>1,2</sup>, Hanneke Kruize<sup>3</sup>, Christopher Gidlow<sup>4</sup>, Sandra  
10 Andrusaityte<sup>5</sup>, Josep Maria Antó<sup>1,2</sup>, Xavier Basagaña<sup>1,2</sup>, Marta Cirach<sup>1,2</sup>, Payam  
11 Dadvand<sup>1,2</sup>, Asta Danileviciute<sup>5</sup>, David Donaire<sup>1,2</sup>, Judith Garcia<sup>1,2</sup>, Michael Jerrett<sup>9</sup>,  
12 Marc Jones<sup>4</sup>, Jordi Julvez<sup>1,2</sup>, Elise van Kempen<sup>3</sup>, Irene van Kamp<sup>3</sup>, Jolanda Maas<sup>7</sup>,  
13 Edmund Seto<sup>9</sup>, Graham Smith<sup>4</sup>, Margarita Triguero<sup>1,2</sup>, Wanda Wendel-Vos<sup>3</sup>, John  
14 Wright<sup>10</sup>, Joris Zufferey<sup>6</sup>, Peter Jan van den Hazel<sup>8</sup>, Roderick Lawrence<sup>6</sup>, Regina  
15 Grazuleviciene<sup>5</sup>.  
16

17  
18  
19 <sup>1</sup> Centre for Research in Environmental Epidemiology (CREAL), Barcelona,

20 <sup>2</sup> Consortium for Biomedical Research in Epidemiology and Public Health (CIBER en  
21 Epidemiología y Salud Pública-CIBERESP), Madrid, Spain <sup>3</sup> RIVM, Bilthoven,  
22 Netherlands

23 <sup>4</sup> CSHER, Stoke-on-Trent, United Kingdom

24 <sup>5</sup> Vytauto Didziojo Universitetas, Kaunas, Lithuania

25 <sup>6</sup> University of Geneva, Geneva, Switzerland

26 <sup>7</sup> VUMC, Amsterdam, Netherlands

27 <sup>8</sup> VGGM, Arnhem, Netherlands

28 <sup>9</sup> UCB, University of California Berkeley, United States

29 <sup>10</sup> Bradford Hospital Trust  
30

31 Project management and contact: Diana van Gent (CREAL); [dvangent@creal.cat](mailto:dvangent@creal.cat)  
32  
33  
34

35 Mark J Nieuwenhuijsen PhD

36 Research Professor in Environmental Epidemiology

37 Center for Research in Environmental Epidemiology (CREAL)

38 Parc de Recerca Biomèdica de Barcelona - PRBB (office 183.05) C. Doctor Aiguader,  
39 88, 08003 Barcelona, SPAIN

40 Tel.: direct (+34) 93 2147337

41 Assistant: Mar Ferrer: (+34) 93 2147330

42 [mferrer1@creal.cat](mailto:mferrer1@creal.cat)

43 FAX: (+34) 93 2147302

44 Email: [mnieuwenhuijsen@creal.cat](mailto:mnieuwenhuijsen@creal.cat)

45 Webpages: <http://www.creal.cat/>

46 [www.phenotype.eu](http://www.phenotype.eu)  
47  
48  
49  
50  
51  
52  
53  
54  
55  
56  
57  
58  
59  
60

## Abstract

**Introduction:** Growing evidence suggests that close contact with nature brings benefits to human health and well-being, but the proposed mechanisms are still not well understood and the associations with health effects remain uncertain. The PHENOTYPE project investigates the interconnections between natural outdoor environments, in both rural and urban settings, and better human health and well-being in the North West, South and East of Europe. Here we provide a description of the proposed work.

**Aims and methods:** The PHENOTYPE project explores the proposed underlying mechanisms at work (stress reduction/restorative function, physical activity, social interaction, exposure to environmental hazards) and examines the health effects (e.g. general health and wellbeing, mental health/neural development, stress, cardiovascular, cancer and respiratory mortality and morbidity, birth outcomes and obesity) for different population groups (e.g. pregnant women and/or foetus, different age groups, socioeconomic status, ethnic groups, and patients). It implements conventional and new innovative high tech methods to characterize the natural environment in terms of quality and quantity. Preventive as well as therapeutic effects of contact with the natural environment are being covered. PHENOTYPE further addresses implications for land-use planning and green space management.

**Result:** The main innovative part of the study is the evaluation of possible short and long term effect of green space and the possible underlying mechanisms in 4 different countries (with quite different type of green space and use of green space) using the same methods and methodology in one research program. This type of holistic approach has not been undertaken before. Furthermore there are technological innovations such as the use of remote sensing and smartphones in the assessment of green space.

**Conclusion:** The project will produce a more robust evidence base on links between exposure to natural outdoor environment and human health and well-being, in addition to a better integration of human health needs into land use planning and green space management in rural as well as urban areas.

1  
2  
3  
4  
5  
6 **Keywords:** green space, blue space, health, well being, physical activity, social  
7 contacts, restoration, stress, air pollution, remote sensing, GIS, audit, questionnaire  
8 survey, smartphones  
9  
10  
11  
12  
13  
14  
15  
16  
17  
18  
19  
20  
21  
22  
23  
24  
25  
26  
27  
28  
29  
30  
31  
32  
33  
34  
35  
36  
37  
38  
39  
40  
41  
42  
43  
44  
45  
46  
47  
48  
49  
50  
51  
52  
53  
54  
55  
56  
57  
58  
59  
60

## Article summary

### Strengths

The PHENOTYPE project is the largest European project on green space and health

The PHENOTYPE project examines simultaneously the possible underlying mechanisms (stress reduction/restorative function, physical activity, social interaction, exposure to environmental hazards) for the relationship between green space and health in 4 different countries in Europe

The PHENOTYPE project examines a range of possible health effects of green space using 16 different cohorts and/registries in 4 different European countries

The PHENOTYPE project uses a range of novel tools and methods to assess access and use of green space including remote sensing, smartphones, audits and interviews.

The PHENOTYPE project works closely with stakeholders and produces new information for stakeholders.

### Weakness

The limited funding may not lead to the full exploitation by the wealth of data generated within the life time of the project

## Introduction

Positive health effects have been observed between green space and mortality longevity (Takano et al. 2002; Mitchell and Popham 2008, Villeneuve et al. 2012), cardiovascular disease (Pereira et al. 2012), people's self reported general health (de Vries et al. 2003; Maas et al. 2006), mental health (Grahn & Stigsdotter, 2003; Hartig et al. 2003; Maas, et al. 2009b; Ottosson & Grahn, 2005, Richardson et al. 2013), sleep patterns (Astell-Burt et al. 2013a), recovery from illness (Ulrich 1994), social health aspects (Kim & Kaplan, 2004; Sullivan et al. 2004; Kweon et al 1998; Maas et al. 2009a; de Vries 2010) and birth outcomes (Donavan et al. 2012; Dadvand et al. 2012a, Dadvand et al. 2012b). Some of the associations were shown to be modified by social economic status and level of urbanity, with greater benefits for populations with lower socioeconomic class (Mitchell & Popham, 2008, Dadvand et al. 2012a) and those in more urban areas (Maas et al. 2006; Mitchell et al. 2007). Furthermore gender has been shown to modify the relationship (Richardson and Mitchell 2010b).

Increased physical activity and social contacts, psychological restoration/stress reduction, and a reduction in pollutants such as noise and air pollution, and temperature have been proposed as possible mechanisms for the health benefits of green space. Access to and/or use of green space has been associated with higher levels of physical activity (Cohen et al. 2006; Cohen et al. 2007; Coombes et al. 2010; Lachowycz and Jones 2011; Toftager et al. 2011; Rodriguez et al. 2012; Mytton et al. 2012; Annerstedt et al. 2012; Almanza et al. 2012; Astell-Burt et al. 2013b; Richardson et al. 2013) and lower levels of obesity within communities (Coombes et al. 2010; Ellaway et al. 2005; Wolch et al. 2011; Toftager et al. 2011; Pereira et al. 2013; Astell-Burt et al. 2013c; Lovasi et al 2013). Studies even suggested that 'green exercise' can have even more positive mental health benefits than other kinds of exercise (Bodin et al. 2003; Pretty et al. 2005; Bowler et al. 2010; Thompson Coon et al. 2011).

Psychological restoration (Kaplan & Kaplan, 1989; van den Berg et al. 2003; van den Berg & Custers, 2011;) and reduced stress and anxiety (Ulrich et al., 1991, Grahn & Stigsdotter, 2003; Hartig et al. 2003; Maas et al. 2009; Stigsdotter et al 2010) have all been associated with access to and/or use of green and natural space. An inner city study in a deprived estate in Chicago showed the benefits of green space both to cognitive

1  
2  
3 restoration (Faber Taylor 2002; Kuo & Sullivan, 2001a), self-discipline (Faber Taylor  
4 et al. 2002), reduced aggression (Kuo & Sullivan, 2001a) and reduced crime (Kuo &  
5 Sullivan, 2001b), with the latter also observed elsewhere recently (Wolfe and Mennis  
6 2013)  
7  
8  
9

10  
11 Furthermore a few studies have suggested that green space is associated with more  
12 social contacts and cohesion (Kuo et al. 1998; Kweon et al. 1998; Maas et al 2009).  
13 And finally reduction of personal exposure to air pollution has been observed in areas  
14 with more green space (Dadvand et al. 2012c), while vegetation has been suggested to  
15 reduce air pollution levels, and temperature (Baldauf et al. 2009; Su et al. 2011; Park et  
16 al. 2012a, 2012b), with some suggestion that the benefits are greater for socially  
17 disadvantaged groups (Su et al. 2011). It has also been suggested that vegetation (trees,  
18 plants) and soil may have an impact on the sound level (Aylor, 1972; Fan et al. 2010;  
19 Fang & Ling, 2003, 2005; Samara & Tsitsoni, 2007; Zhang & Kang, 2007). Part of the  
20 appeal of green spaces may be related to pleasant acoustic environments (Brown, 2006  
21 in: Health Council of the Netherlands, 2006). This may have its own, direct beneficial  
22 health effect (Health Council of the Netherlands, 2006).  
23  
24  
25  
26  
27  
28  
29  
30  
31

32  
33 While this growing evidence exists that close contact with nature brings benefits to  
34 human health and well-being, the proposed mechanisms are still not well understood  
35 and the associations with health effects remain uncertain. Furthermore, it is unclear if  
36 the possible mechanisms act in isolation or together, since with some exceptions (de  
37 Vries et al. 2013) they have been studied in isolation. A coherent conceptual framework  
38 on the proposed mechanisms is currently lacking. Also, most of the research has been  
39 conducted in the North West of Europe and USA leaving questions about the  
40 generalisability to other regions. Inconsistency and variation in indicators (eg type, size  
41 and quality) for green space have often made it difficult to compare results from  
42 different studies, and a better characterisation including that of quantity and quality of  
43 green and blue spaces is needed, not only for research but also for policymakers and  
44 spatial planners. Studies have often focused on access to green space without taking into  
45 account actual use of green space. While blue space may also have a positive effect on  
46 health, probably in combination with green space, there are only a few epidemiological  
47 studies investigating this (Völker and Kistemann 2011, Völker and Kistemann 2013,  
48 White et al. 2013)  
49  
50  
51  
52  
53  
54  
55  
56  
57  
58  
59  
60



1  
2  
3  
4 PHENOTYPE, a collaborative research project and explores the proposed underlying  
5 mechanisms at work (stress reduction/restorative function, physical activity, social  
6 interaction, exposure to environmental hazards). PHENOTYPE is the first study  
7 designed to examine these mechanisms simultaneously in a large sample (N=4000  
8 subjects) in various European countries using the same methodology. This allows the  
9 study of specific factors while adjusting for others, and thereby strengthening the  
10 interpretation of the results. It further examines both the long term and short term health  
11 effects (eg general health and wellbeing, mental health/neural development, stress,  
12 cardiovascular, cancer and respiratory mortality and morbidity, birth outcomes and  
13 obesity) for different population groups (e.g. pregnant women and/or foetus, different  
14 age groups, socioeconomic status, ethnic groups, and patients), through analyses of  
15 existing cohort studies, observational studies and experiments. Preventive as well as  
16 therapeutic effects of contact with the natural environment are being evaluated. A  
17 coherent conceptual framework on the association between the natural environment and  
18 its effects on health and well-being is being developed, and it addresses implications for  
19 land-use planning and green space management.  
20  
21  
22  
23  
24  
25  
26  
27  
28  
29  
30  
31  
32

33 The study includes both rural and urban settings, but the main focus is on the urban  
34 environment, for a number of reasons. Most of the population lives in urban areas  
35 (75%) in Europe, making these of greater relevance to public health, and rapid  
36 urbanization continues to reduce accessible natural environments for urban residents.  
37 Most people make more frequent use of the green spaces in their nearby living  
38 environment instead of travelling greater distances to rural areas, in particular people  
39 with lower socio-economic status, elderly people and children (Schwanen et al. 2002;  
40 Maas 2008). Furthermore, rural dwellers tend to have constant contact with the natural  
41 environment and it may therefore also be more difficult to assess its effects.  
42  
43  
44  
45  
46  
47  
48

49 Lastly, the project uses an interdisciplinary and integrated approach, applying the best  
50 and most efficient methods to understand the relation between exposure to the natural  
51 environment and health. It implements conventional and new innovative high tech  
52 methods to characterize the natural environment in terms of quality and quantity. This  
53 paper provides a general overview of the research methodology of PHENOTYPE.  
54  
55  
56  
57  
58  
59  
60

## Methods and results

Figure 1 summarizes the different parts of the study and the interdependencies between the different parts, namely the characterisation of the natural environment and the way it is used, examination of the underlying mechanisms in daily life settings, short and long term effects of the natural environment, and the implications for management and policy of the natural environment (see overview Figures 1 and web figure 1). In this section we will elaborate on each of these parts. A summary of the mechanisms, outcomes, populations and areas selected for investigation are given in Table 1.

### *Characterising the natural environment and the way it is used.*

The research includes evaluation of the natural environment, which includes for the purposes of the project:

- Green spaces (e.g. roof gardens, city parks, court yards) and “greenery”; forests, nature reserves/parks, mountains, farmland, trees, landscaping
- Blue spaces; water such as canals, ponds, creeks, rivers, beaches etc.

Although many of these may actually not be “natural” since they have been man-made, for the purpose of the project we classify them as such.

One of the main aims of PHENOTYPE is to examine the importance of both quantitative (e.g. amount, type, access, use) and qualitative characteristics (e.g. acoustic quality, identity, variety, safety, rubbish) of the natural environment by collecting detailed data on these characteristics using a combination of methods. The focus lies on natural environments at different scales and distances from the home (city/town, neighbourhood, street level) and where possible also at other places where people stay (work, school, on their way to home/school, recreational). In addition, actual use of the natural environment is taken into consideration. To achieve the aim, a detailed assessment will be conducted in 4 case cities (Barcelona, Spain; Doetinchem, the Netherlands; Kaunas, Lithuania; and Stoke-on-Trent, United Kingdom), with less detailed assessment in other study areas.

1  
2  
3 PHENOTYPE uses conventional land use maps, remote sensing data from satellites and  
4 aerial photography, complemented by detailed discussions with volunteers and other  
5 stakeholder living and working in the studied areas to derive comparable classifications  
6 of the natural environment in different countries. Collected data will contribute to the  
7 characterisation of the natural environment (both quantitative and qualitative e.g.  
8 accessibility, acoustical quality, recreational activities, walkability etc). For the  
9 quantitative characterisation, PHENOTYPE makes use of available land use maps such  
10 as COordination and INformation on the Environmental programme, initiated by the  
11 European Commission (CORINE)(EAA 2005) and Urban Atlas (EAA 2010), and  
12 remote sensing and aerial photography to obtain comparable indices such as NDVI  
13 (Weier and Herring, 2011) of the natural outdoor environment in different countries.  
14 Landsat Enhanced Thematic Mapper Plus (ETM+) data are applied to a classification  
15 and regression tree (CART) model to categorise land cover types for the urban areas of  
16 interest (Su et al 2010). Early application of the NDVI in Barcelona, Spain showed  
17 good results (Web Figure 2, Dadvand et al. 2012a)  
18  
19  
20  
21  
22  
23  
24  
25  
26  
27  
28

29  
30 To collect additional qualitative information on the natural environment and on other  
31 physical and social features, systematic observations (audits) are conducted by trained  
32 researchers in selected neighbourhoods in the 4 case cities. The researchers walk  
33 through the neighbourhood, systematically coding characteristics such as the  
34 architectural character, maintenance of the landscape, and perceptions on how a place  
35 looks and feels. To collect comparable information in the 4 case cities, two standardized  
36 forms are used. One form is used for evaluating the streetscape, using indicators derived  
37 from the Street Typology developed by Leijdelmeijer et al. (2002), a list of evaluating  
38 the quality of green by Van Dillen (2012) and the audit tool developed by Van Lenthe et  
39 al. (2006). A second form is used for evaluating the natural spaces in the study areas of  
40 at least 1 ha. It is an adapted form of the Neighbourhood Green Space Tool developed  
41 by Gidlow et al. (2012).  
42  
43  
44  
45  
46  
47  
48  
49  
50

51 To gain insight into the way people use the natural environment, a face to face  
52 questionnaire survey is conducted to collect data on 1000 people in the 30 selected  
53 neighbourhoods in each of the 4 case cities, and an in-depth study using “Calfit”, a  
54 smartphone-based monitor of time-location patterns and momentary states, on a  
55 subsample (n=100) of the participants of the questionnaire survey. The Calfit software  
56  
57  
58  
59  
60

1  
2  
3 runs on a Google Android operating system and as currently configured can collect data  
4 on physical activity using the motion sensor and geographic location through a global  
5 positioning system (GPS), to obtain information on minutes spent and physical activity  
6 levels in different natural environments (Web Figure 3). The instrument has been  
7 validated against the Actigraph accelerometer (Donaire et al. 2013), combined with  
8 other pollution measurements to assess likely inhalation (de Nazelle et al. 2013), and  
9 lab-validated using the Cosmed metabolic monitoring system.  
10

11  
12  
13  
14  
15  
16 The work will produce different indicators of natural space that can be used in the  
17 studies described below. The aim is to make a hierarchy of indicators with on the  
18 bottom simple measures such as NDVI that can be easily obtained for all the study areas  
19 and on the top detailed measures of for example green space with actually information  
20 on the quantity, quality and use that can only be obtained for only some areas after in-  
21 depth study. As part of the work, we will examine the relationship between the simple  
22 and detailed measures to better understand how detailed information on small scale can  
23 help the interpretation of health studies conducted in larger areas with only simple  
24 measures available using existing epidemiological studies and registries (see below).  
25  
26  
27  
28  
29  
30  
31

### 32 33 *Examining the underlying mechanism in the daily life setting*

34

35  
36 New data will be collected to explore in detail and simultaneously the proposed  
37 mechanisms underlying the relationship between the natural environment and health  
38 and well-being, in the four case cities. In each of these cities 30 neighbourhoods varying  
39 in socio-economic status and in their distance to green space are selected. In these  
40 neighbourhoods the natural environment will be characterised, and a selection of 1000  
41 randomly selected residents (4000 in total, 18-75 years) will participate in a  
42 questionnaire survey, a smartphone study, and in in-depth interviews (Web Figure 4).  
43 The choice of items was based on the proposed mechanisms and was achieved via an  
44 interactive process of experts within the PHENOTYPE team and others in the  
45 institutions involved. As much as possible questions were derived from existing and  
46 validated indices. The questionnaire was piloted by the four centers separately with  
47 specific attention for comprehensibility, clarity and duration and was adapted based on  
48 these pilots. The questionnaire is structured along several main clusters of questions: i)  
49 residential situation: ii) dwelling iii) wellbeing and health, and iv) personal  
50  
51  
52  
53  
54  
55  
56  
57  
58  
59  
60

1  
2  
3 characteristics. It includes questions on perceived quality and use of green and blue  
4 space in the residential area and in the immediate living environment, perceived  
5 environmental and social quality including aspects as noise, amenities and social  
6 cohesion, lifestyle, subjective health and questions related to personal background. The  
7 questionnaire was developed in English and translated and back translated in Dutch,  
8 Spanish and Lithuanian. More details on the frameworks and questionnaire will be  
9 described in a forthcoming paper by Van Kamp et al. (In prep). Also we will assessment  
10 cognitive fatigue in each subject as measured by CTT.  
11  
12  
13  
14  
15  
16

17  
18 From the 1,000 volunteers in each of the 4 case cities who complete the questionnaire,  
19 100 people are approached to take part in a smartphone study (400 in total). During 7  
20 subsequential days the emotional state of the subject, the local environment (e.g.,  
21 different quantities or qualities of natural space) and the social setting are assessed with  
22 the smartphone and the innovative Calfit technology. Besides objective geolocation and  
23 physical activity, subjective data on stress reduction/restoration and social contacts are  
24 collected simultaneously. The latter data are collected through interactive diaries  
25 capable of eliciting ecological momentary assessment (EMA). EMA is a novel approach  
26 to elicit responses to electronic surveys throughout the course of daily life (Shiffman et  
27 al. 2008). The participant receives prompts at random intervals to complete small  
28 surveys on the phone, which then have time and location stamp.  
29  
30  
31  
32  
33  
34  
35  
36

37  
38 From the people who participate in both the questionnaire survey and the CALFIT study  
39 and who indicate they wanted to volunteer, 80 people (20 in each case city) are  
40 approached for semi structured interviews. These interviews are conducted to gain more  
41 detailed information on specific topics included in the questionnaire survey and  
42 CALFIT/EMA. Topics addressed include the motivation for travel routes, the effect of  
43 natural environment on mood, behaviour and well-being, the attitude towards and  
44 importance of (experiences with) natural environment, and reasons for using or not  
45 using the natural environment.  
46  
47  
48  
49  
50  
51

### 52 ***Epidemiological studies to examine long term effects of the natural environment***

53  
54  
55  
56 By using existing epidemiological studies and registries and linking these to the natural  
57 space indicators described earlier, the association between natural environment and a  
58  
59  
60

1  
2  
3 range of different long term health effects will be examined in an efficient and cost  
4 effective manner. PHENOTYPE makes use of 16 existing cohorts and registries with  
5 good health outcome data in Spain, the Netherland, Lithuania, and United Kingdom  
6 (Web Table 1), linking these to newly created natural environment indicators.  
7

8  
9 Comparable estimates are produced for various regions in Europe for the effects on  
10 pregnancy outcomes, foetus development, children's health and adult population  
11 morbidity and mortality. We specifically focus on:  
12

- 13 • the natural outdoor environment and ethnicity, socio-economic status, women's  
14 health and pregnancy outcomes;
- 15 • the natural outdoor environment and foetus development, birth weight, and  
16 gestational age;
- 17 • the natural outdoor environment and general development, neurodevelopment,  
18 cognitive function and respiratory health in children;
- 19 • the natural outdoor environment and respiratory health in various European cities;
- 20 • the natural outdoor environment and general health, physical activity, specific  
21 morbidity and mortality.  
22  
23  
24  
25  
26  
27  
28  
29

30  
31 The assessment of natural environment indicators will be mainly based on satellite data  
32 and land use maps as CORINE and Urban atlas, and sometimes local data. This will  
33 restrict to some extent the evaluation of the effect of the natural environment, but this is  
34 the only realistic and achievable approach. All studies examine the role of socio-  
35 economic status, which has been suggested as an effect modifier for the relationship  
36 between exposure to the natural environment and health benefits. The European  
37 Community Respiratory Health study (ECRHS) (Burney et al 1994) further allows for  
38 examination of exposure to the natural outdoor environment and health effects in a  
39 range of different European cities. Some cohorts such as the Born in Bradford study  
40 (Wright et al. 2012) offers a unique opportunity to investigate the role of ethnicity in the  
41 relationship between exposure to the natural outdoor environment and health benefits,  
42 in Bradford study half of the participants are from Pakistani background, with  
43 information on both the mother and baby from pregnancy to early years in life.  
44  
45  
46  
47  
48  
49  
50  
51  
52  
53

#### 54 ***Experiments to examine short term effects of the natural environment***

55  
56  
57  
58  
59  
60

1  
2  
3 To examine short term effects of the natural environment on health and well-being, one  
4 or more experimental studies are conducted in each country in which individuals are  
5 exposed to different types of natural and urban environments (i.e., environmental  
6 conditions). The majority of data collection is field-based to maximise the ecological (as  
7 well as internal) validity of any observed effects.  
8  
9

10  
11 Using a range of psychological and physiological indicators relevant to the various  
12 possible mechanisms, and inclusion of healthy and patient population groups (with  
13 mental and physical morbidities) collectively explore:  
14

- 15 - preventive and therapeutic effects of natural environments.
- 16 - immediate and sustained changes in affective, cognitive and physiological  
17 responses indicative of well-being while engaged in a natural environment, and  
18 after leaving a natural environment
- 19 - neurobiological responses to viewing natural or urban scenes before/after  
20 experiencing stress.  
21  
22  
23  
24  
25  
26  
27

28 Through variation in experimental design, each partner makes a novel contribution(s) to  
29 the area as (details in Web Table 2):  
30

- 31 • UK: In healthy individuals, Study 1 compares immediate and post-exposure psycho-  
32 physiological effects of urban versus natural environments to explore whether any  
33 beneficial effects are sustained following single exposures; Study 2 uses longer-term  
34 follow-up and repeated exposure to natural environments to explore whether any  
35 effects are accumulated, sustained or attenuated.  
36  
37
- 38 • Netherlands: an experimental functional Magnetic Resonance Imaging (fMRI) study  
39 is conducted in healthy individuals to investigate neurobiological responses to  
40 viewing natural or urban scenes before/after experiencing stress; i.e., whether  
41 viewing natural compared to urban scenery can prevent or buffer against stress  
42 responses, and how this is represented in brain activation patterns.  
43  
44
- 45 • Spain: in individuals with elevated stress levels, group-based exposure and  
46 Ecological Momentary Assessment (EMA, using CALFIT technology) are used to  
47 explore the role of social interaction and the nature of physical activity, in  
48 immediate and longer term responses. Ecological validity will be enhanced through  
49 ‘free-living’ activities within environments, rather than controlling activities, again,  
50 using EMA, GPS and accelerometry to monitor the nature (and perceptions) of this  
51 activity.  
52  
53  
54  
55  
56  
57  
58  
59  
60

- Lithuania: a clinical population with established coronary artery disease (CAD) are recruited to evaluate the therapeutic effect of the natural environment. The outcomes of this experiment may have direct clinical applications for the use of urban and different types of natural environment in cardiac rehabilitation.

### ***Implications, policy and guidelines and involvement of stakeholders***

#### *Guidelines*

PHENOTYPE will provide recommendations for policymakers and guidelines for professional practitioners involved with spatial planning and health to create natural environments that promote health and well being. For this, we focus on a human ecological perspective which allows for a better integration of human health needs into land use planning and green space management in both rural and urban areas (Lawrence 2001). Currently legal standards that have been developed with economic, technological and political priorities in mind, are leading in urban design, whereas the lifestyle, sense of community, identity, and health and well being of local populations have been largely undervalued. The guidelines will reflect the importance to consider environmental, social, economic and other components of the natural and built environments in ways that also take into account and result from the point of view of citizens. PHENOTYPE will complement the common quantitative approach by valorising the social/human functions of these environments, especially their contribution to promoting health and quality of life.

Following this broad and innovative approach, PHENOTYPE will formulate, test and validate a set of recommendations and guidelines concerning the desired characteristics of different types of natural environments in urban and rural areas, specifically their characteristic features, accessibility to them for different population groups, as well as their facilities, maintenance and services. By doing so, the work will overcome the existing applicability gap between information and knowledge accumulated by much research and policy definition and implementation.



1  
2  
3 The guidelines for professional practitioners involved with spatial planning and health  
4 will consider three core topics in relation to each of the natural environment being  
5 considered:  
6

- 7 1. Qualitative characteristics of natural environments; recommendations concerning  
8 surface area, vegetation, water sources, ambient noise levels, views and  
9 microclimate;  
10
- 11 2. Facilities, Maintenance and Services; recommendations about the kinds of  
12 communal facilities and services provided in each type of natural environment, as  
13 well as suggested levels of maintenance;  
14
- 15 3. Accessibility Guidelines to Natural Environments; including requirements about  
16 access to different types of natural environments such as allotments,  
17 neighbourhood parks, children's playgrounds and nature reserves.  
18

19 The baseline for the work is firstly the compilation and analysis of currently available  
20 information from existing databases and literature, and later new data collected by the  
21 project as described above. This will be complemented by the engagement with the  
22 appropriate stakeholders to assess scope for development. These insights will be  
23 combined into a conceptual framework on the underlying mechanisms of the effects of  
24 the natural environment on health and well-being.  
25  
26  
27  
28  
29  
30  
31  
32  
33

### 34 *Stakeholders and dissemination*

35  
36  
37 The participation provides a forum for project assurance and benefits for PHENOTYPE  
38 are summarised as follows:  
39  
40  
41

- 42 - A more robust evidence base on links between exposure to natural outdoor  
43 environment and human health/well-being for various regions in Europe. Hereby  
44 we expect to develop a better understanding of the potential mechanisms.  
45
- 46 - A better integration of human needs into land use planning and green space  
47 management in rural as well as urban areas. Furthermore, the application of  
48 these needs in practical guidelines.  
49  
50  
51  
52  
53

54 Stakeholder involvement is critical for bringing outside (policy) ideas into the research  
55 planning, to increase the usefulness of the research, and to assure a better  
56 implementation of the results of the project (Web Figure 5). In a research project, this is  
57  
58  
59  
60

1  
2  
3 often limited because the lack of interest of stakeholders and the limited resources and  
4 efforts of consortia.  
5  
6

7  
8 From the start of PHENOTYPE actively sought to establish and maintain relations and  
9 dialogues with and between key stakeholders from local, regional and national health  
10 and environment authorities, institutions and the international research community.  
11 These include policy makers, architects, urban planners, natural space managers, health  
12 professionals, and the international research community. This group is highly diverse,  
13 as we are looking at a range of professions within the subject areas of environment and  
14 health, from volunteers to scientists, community workers and policy developers.  
15 PHENOTYPE has thus far been successful in its engagement activities, providing  
16 continuous opportunities for information exchange and collaborations. These contribute  
17 to strengthening networking between researchers, policy-makers and stakeholders in  
18 order to facilitate the transfer of scientific knowledge to policy development, to  
19 exchange ideas about best practice and to help identify emerging issues on the natural  
20 outdoor environment and its mechanisms to improve health.  
21  
22  
23  
24  
25  
26  
27  
28  
29  
30

31 The PHENOTYPE website [www.phenotype.eu](http://www.phenotype.eu) provides an overview of the project,  
32 progress, actualities, surveys and publications. The site has a sign up form for periodic  
33 newsletters through which all stakeholders are regularly informed. It guarantees  
34 continuous visibility, and provides a means for interested parties to respond to activities,  
35 or to contact us with invitations to attend workshops, etc. PHENOTYPE is also found  
36 on social media twitter (@greenhealth4eu) and LinkedIn. The PHENOTYPE databases  
37 and overall results will be exploitable by policy makers at national and international  
38 level in areas including urban planning and health.  
39  
40  
41  
42  
43  
44  
45  
46  
47

## 48 **Conclusion**

49  
50  
51 The PHENOTYPE project is an FP7 collaborative action, funded by the EC to explore  
52 the mechanisms underlying positive short term and long term health effects for different  
53 population groups. PHENOTYPE applies conventional and new innovative high tech  
54 methods to characterize the natural environment in terms of quality and quantity.  
55 Preventive as well as therapeutic effects of contact with the natural environment will be  
56  
57  
58  
59  
60

1  
2  
3 covered. The proposed work aims to address the limitations of some of the studies that  
4 have been published so far (Table 2). Furthermore it addresses implications for land-  
5 use planning and green space management. The project will produce a more robust  
6 evidence base on links between exposure to natural outdoor environment and human  
7 health and well-being. This in turn will contribute to improved integration of human  
8 health needs into land use planning and green space management in rural and urban  
9 areas.  
10  
11  
12  
13

14  
15  
16 "No additional data available yet".  
17  
18  
19  
20  
21  
22  
23  
24  
25  
26  
27  
28  
29  
30  
31  
32  
33  
34  
35  
36  
37  
38  
39  
40  
41  
42  
43  
44  
45  
46  
47  
48  
49  
50  
51  
52  
53  
54  
55  
56  
57  
58  
59  
60

1  
2  
3  
4  
5  
6  
7  
8  
9  
10  
11  
12  
13  
14  
15  
16  
17  
18  
19  
20  
21  
22  
23  
24  
25  
26  
27  
28  
29  
30  
31  
32  
33  
34  
35  
36  
37  
38  
39  
40  
41  
42  
43  
44  
45  
46  
47  
48  
49  
50  
51  
52  
53  
54  
55  
56  
57  
58  
59  
60

**Author statement**

Mark J Nieuwenhuijsen, Hanneke Kruize, Christopher Gidlow, Michael Jerrett, Jolanda Maas, Edmund Seto, Peter Jan van den Hazel, Roderick Lawrence, and Regina Grazuleviciene and wrote the original grant proposal on which the study design and paper is based. Mark J Nieuwenhuijsen drafted the version of the paper and received input from all the authors. All authors read and commented on the paper and agree with the final version.

For peer review only

### Acknowledgement

This research is receiving funding from the European Community's Seventh Framework Programme (FP7/2007-2013) under grant agreement no: 282996

[ENV.2011.1.2.3-2] Positive effects of natural environment for human health and well-being] Duration 1 Jan 2012-31 Dec 2015

Ethics approval was obtained for all aspects of the study by the local ethics committees in the countries where the work was conducted, and sent to the European Commission before advancement of the study.

For peer review only

## References

Annerstedt M, Ostergren PO, Björk J, Grahn P, Skärbäck E, Währborg P.

Green qualities in the neighbourhood and mental health - results from a longitudinal cohort study in Southern Sweden. *BMC Public Health*. 2012 May 8;12:337. doi: 10.1186/1471-2458-12-337.

Almanza E, Jerrett M, Dunton G, Seto E, Pentz MA. A study of community design, greenness, and physical activity in children using satellite, GPS and accelerometer data. *Health Place*. 2012 Jan;18(1):46-54.

Astell-Burt T, Feng X, Kolt GS. Does access to neighbourhood green space promote a healthy duration of sleep? Novel findings from a cross-sectional study of 259 319 Australians. *BMJ Open*. 2013a Aug 13;3(8). pii: e003094. doi: 10.1136/bmjopen-2013-003094.

Astell-Burt T, Feng X, Kolt GS. Green space is associated with walking and moderate-to-vigorous physical activity (MVPA) in middle-to-older-aged adults: findings from 203 883 Australians in the 45 and Up Study. *Br J Sports Med*. 2013b Apr 30. [Epub ahead of print]

Astell-Burt T, Feng X, Kolt GS. Greener neighborhoods, slimmer people? Evidence from 246 920 Australians. *Int J Obes (Lond)*. 2013c May 3. doi: 10.1038/ijo.2013.64. [Epub ahead of print]

Aylor DE, *Noise reduction by vegetation and ground*. *J Acoust Soc Am*, 1972. **51**: p. 197-205.

Baldauf R, Watkins N, Heist D, Bailey C, Rowley P, Shores R. 2009. Near-road air quality monitoring: Factors affecting network design and interpretation of data. *Air Qual Atmos Health* 2(1):1-9.

Bodin, M. & Hartig, T. (2003). Does the outdoor environment matter for psychological restoration gained through running? *Psychology of Sport and Exercise*, 4:141-153

Bowler DE, Buyung-Ali LM, Knight TM, Pullin AS. A systematic review of evidence for the added benefits to health of exposure to natural environments. *BMC Public Health* 2010, 10:456

Burney PG, Luczynska C, Chinn S, Jarvis D. The European Community Respiratory Health Survey. *Eur Respir J* 1994; May;7(5):954-60.

Cohen DA, Ashwood JS, Scott MM, Overton A, Evenson KR, Staten LK, Porter D, McKenzie TL, Catellier D. Public parks and physical activity among adolescent girls. *Pediatrics*. 2006 Nov;118(5):e1381-9

- 1  
2  
3 Cohen, D.A., McKenzie, T.L., Sehgal, A., Williamson, S., Golinelli, D. & Lurie, N.  
4 (2007). Contribution of public parks to physical activity. *American Journal of Public*  
5 *Health*, 97:509-14.  
6
- 7 Coombes, E., Jones, A. P., & Hillsdon, M. (2010). The relationship of physical activity  
8 and overweight to objectively measured green space accessibility and use. *Social*  
9 *Science & Medicine*, 70(6), 816–822.  
10
- 11 Dadvand P, de Nazelle A, Figueras F, Basagaña X, Sue J, Amoly E, et al. 2012a. Green  
12 space, health inequality and pregnancy. *Environ Int* 40:110-115.  
13
- 14 Dadvand P, Sunyer J, Basagaña X, Ballester F, Lertxundi A, Fernandez-Somoano A,  
15 et al. 2012b. Surrounding Greenness and Pregnancy Outcomes in Four Spanish Birth  
16 Cohorts. *Environmental health perspectives* 120(10):1481-1487.  
17
- 18 Dadvand P, de Nazelle A, Triguero-Mas M, Schembari A, Cirach M, Amoly E,  
19 Figueras F, Basagaña X, Ostro B, Nieuwenhuijsen M. Surrounding Greenness and  
20 Exposure to Air Pollution During Pregnancy: An Analysis of Personal Monitoring Data.  
21 *Environ Health Perspect.* 2012c;120(9):1286-90  
22
- 23 de Nazelle A, Seto E, Donaire-Gonzalez D, Mendez M, Matamala J, Rodriguez D,  
24 Nieuwenhuijsen MJ, and Jerrett M. Improving estimates of air pollution exposure  
25 through ubiquitous sensing technologies. *Environ Pol* 2013; 176: 92-99  
26
- 27 Dillen SME van, Vries S de, Groenewegen PP, Spreeuwenberg P. Greenspace in urban  
28 neighbourhoods and residents' health: adding quality to quantity. *J Epidemiol*  
29 *Community Health* 2012. 66:e8. doi:10.1136/jech.2009.104695  
30
- 31 Donaire-Gonzalez D, de Nazelle A, Seto E, Mendez M, Rodriguez D, Mark  
32 Nieuwenhuijsen M, and Jerrett M. Comparison of physical activity measures using  
33 smartphone based CalFit and Actigraph. *J Med Internet Res* 2013  
34
- 35 Donovan GH, Michael YL, Butry DT, Sullivan AD, Chase JM. Urban trees and the risk  
36 of poor birth outcomes. *Health & Place* 17 (2011) 390–393  
37
- 38 de Vries, S., Verheij, R. A., Groenewegen, P. P., & Spreeuwenberg, P. (2003). Natural  
39 environments – healthy environments? An exploratory analysis of the  
40 relationship between greenspace and health. *Environment and Planning A*, 35,  
41 1717–1731.  
42
- 43 de Vries S, van Dillen SME, Groenewegen PP, Spreeuwenberg P. Streetscape greenery  
44 and health: Stress, social cohesion and physical activity as mediators. *Social Science &*  
45 *Medicine* 94 (2013) 26e33  
46
- 47 EEA 2005, European Environment Agency, *CORINE land cover 2000 (CLC2000) 100*  
48 *m - version 8/2005 version 2*, Copenhagen.  
49
- 50 EEA 2010, European Environment Agency. Urban Atlas 2010.  
51 <http://www.eea.europa.eu/data-and-maps/data/urban-atlas/>. Created : Apr 13,  
52 2010 Published : May 28, 2010 Last modified : Apr 17, 2013  
53  
54  
55  
56  
57  
58  
59  
60

1  
2  
3  
4 Ellaway E, Macintyre S, Bonnefoy X. Graffiti, greenery, and obesity in adults:  
5 secondary analysis of European cross sectional survey. *BMJ* 2005 17;331(7517):611-2  
6

7 Faber Taylor, A., Kuo, F. E., & Sullivan, W. (2002). Views of nature and self  
8 discipline: Evidence from inner city children. *Journal of Environmental Psychology*, 22,  
9 49–63.  
10

11 Fang CF and Ling DL, *Guidance for noise reduction provided by tree belts*. *Landscape*  
12 *Urban Plan*, 2005. **71**: p. 29-34.  
13

14 Fang CF and Ling DL, *Investigation of the noise reduction provided by tree belts*.  
15 *Landscape Urban Plan*, 2003. **63**: p. 187-195.  
16

17 Fan Y, Zhiyi B, Zhujun Z, and Jiani L, *The investigation of noise attenuation by plants*  
18 *and the corresponding noise-reducing spectrum*. *J Environ Health*, 2010. **72**: p. 8-15.  
19

20  
21  
22  
23  
24  
25  
26  
27  
28  
29  
30  
31  
32  
33  
34  
35  
36  
37  
38  
39  
40  
41  
42  
43  
44  
45  
46  
47  
48  
49  
50  
51  
52  
53  
54  
55  
56  
57  
58  
59  
60

Gidlow CJ, Ellis NJ, Bostock S. Development of the Neighbourhood Green Space Tool  
(NGST) *Landscape and Urban Planning* 106 (2012) 347– 358

Grahn, P., & Stigsdotter, U. A. (2003). Landscape planning and stress. *Urban Forestry  
& Urban Greening*, 2(1), 1–18.

Hartig, T., Evans, G. W., Jamner, L. D., Davies, D. S., & Gärling, T. (2003). Tracking  
restoration in natural and urban field settings. *Journal of Environmental Psychology*,  
23, 109–123.

Hartig, T., Mang, M., & Evans, G. W. (1991). Restorative effects of natural environment  
experience. *Environment and Behavior*, 23, 3–26.

Kaplan, R., & Kaplan, S. (1989). *The experience of nature: A psychological  
perspective*. New York: Cambridge University Press.

Kim, J., & Kaplan, R. (2004). Physical and psychological factors in sense of community  
– New urbanist Kentlands and nearby orchard village. *Environment Behavior*, 36,  
313–334.

Kuo, F. E., & Sullivan, W. C. (2001a). Aggression and violence in the inner city:  
Effects of environment on mental fatigue. *Environment and Behavior*, 33(4),  
543–571.

Kuo, F. E., & Sullivan, W. C. (2001b). Environment and crime in the inner city:  
Effects of environment via mental fatigue. *Environment and Behavior*, 33(3),  
343–367.

Kuo FE, Sullivan WC, Wiley A. Fertile ground for community: inner-city  
neighborhood common spaces. *Am J Community Psychol*, 1998a; 26:823-51

Kweon, B. S., Sullivan, W. C., & Wiley, A. (1998). Green common spaces and the  
social integration of inner-city older adults. *Environment and Behavior*, 30, 832–858.



1  
2  
3  
4 Lachowycz, K., & Jones, A. P. (2011). Greenspace and obesity: a systematic review of  
5 the evidence. *Obesity Reviews*, 12(5), e183-e189. doi: 10.1111/j.1467-  
6 789X.2010.00827.x

8  
9 Lawrence, RJ (2001) Human Ecology. IN: M. Tolba (ed.), *Our Fragile World:  
10 Challenges and opportunities for sustainable development, Volume 1*. EOLSS  
11 Publishers, Oxford, 2001, pp.675-693

12  
13 Leidelmeijer K, Marsman G, Reijden H van der, Grieken P van. Tussen woning en wijk.  
14 Een straattypologie voor Nederland. Amsterdam: RIGO, 2002.

15  
16 Lenthe F van, Huisman M, Kamphuis C, Giskens K, Brug J, Mackenbach J. Een  
17 beoordelingsinstrument van de fysieke en sociale buurtkenmerken die gezondheid  
18 stimuleren dan wel belemmeren. Eindverslag van een project gefinancierd door het  
19 Fonds Openbare Gezondheidszorg (OZG). Rotterdam: Erasmus MC, 2006.

20  
21 Lovasi GS, Schwartz-Soicher O, Quinn JW, Berger DK, Neckerman KM, Jaslow  
22 R, Lee KK, Rundle A. Neighborhood safety and green space as predictors of obesity  
23 among preschool children from low-income families in New York City. *Prev*  
24 *Med*. 2013 May 31. pii: S0091-7435(13)00175-8. doi: 10.1016/j.ypmed.2013.05.012.  
25 [Epub ahead of print]

26  
27 Maas, J., van Dillen, S. M. E., Verheij, R. A., & Groenewegen, P. P. (2009a). Social  
28 contacts as a possible mechanism behind the relation between green space and health.  
29 *Health and Place*, 15(2), 586–595.

30  
31 Maas, J., Verheij, R. A., de Vries, S., Spreeuwenberg, P., Groenewegen, P. P., &  
32 Schellevis, G. S. (2009b). Morbidity is related to a green living environment. *Journal of*  
33 *Epidemiology and Community Health*, 63, 967–973.

34  
35 Maas, J., Verheij, R. A., Groenewegen, P. P., de Vries, S., & Spreeuwenberg, P. (2006).  
36 Green space, urbanity and health: How strong is the relation? *Journal of Epidemiology*  
37 *and Community Health*, 60, 587–592.

38  
39 Maas J. 2008. Vitamin G: Green environments-Healthy environments. Utrecht: Nivel.

40  
41 Mitchell, R., & Popham, F. (2007). Greenspace, urbanity and health: Relationships in  
42 England. *Journal of Epidemiology and Community Health*, 61, 681–683.

43  
44 Mitchell, R., & Popham, F. (2008). Effect of exposure to natural environment on  
45 health inequalities: An observational population study. *The Lancet*, 372(9650),  
46 1655–1660.

47  
48 Mytton OT, Townsend N, Rutter H, Foster C. Green space and physical activity: an  
49 observational study using Health Survey for England data. *Health Place*. 2012  
50 Sep;18(5):1034-41. doi: 10.1016/j.healthplace.2012.06.003. Epub 2012 Jun 17.

1  
2  
3 Nilsson K, Sangster M, Gallis C, Hartig T, de Vries S, Seeland K, et al. 2011. Forests,  
4 Trees and Human Health. New York: Springer.

5  
6 Ottosson, J., & Grahn, P. (2005). A comparison of leisure time spent in a garden with  
7 leisure time spent indoors: On measures of restoration in residents in geriatric  
8 care. *Landscape Research*, 30(1), 23–55.

9  
10  
11 Park M, Hagishima A, Tanimoto J, Narita K-i. 2012a. Effect of urban vegetation on  
12 outdoor thermal environment: Field measurement at a scale model site. *Building and  
13 Environment* 56:38-46.

14  
15  
16 Park M, Hagishima A, Tanimoto J, Narita K-i. 2012b. Effect of urban vegetation on  
17 outdoor thermal environment: Field measurement at a scale model site. *Building and  
18 Environment* 56:38-46.

19  
20  
21 Pereira G, Christian H, Foster S, Boruff BJ, Bull F, Knuiman M, Giles-Corti B  
22 The association between neighborhood greenness and weight status: An observational  
23 study in Perth Western Australia *Environmental Health* 2013, 12:49 (19 June 2013)

24  
25  
26 Pereira G, Foster S, Martin K, Christian H, Boruff BJ, Knuiman M and Giles-Corti B.  
27 The association between neighborhood greenness and cardiovascular disease: an  
28 observational study. *BMC Public Health* 2012, 12:466

29  
30  
31 Pretty, J., Peacock, J., Sellens, M. & Griffin, M. (2005). The mental and physical health  
32 outcomes of green exercise. *International Journal of Environmental Health Research*,  
33 15(5):319-337.

34  
35  
36 Richardson, E. A., & Mitchell, R. (2010b). Gender differences in relationships between  
37 urban green space and health in the United Kingdom. *Social Science and Medicine*,  
38 71(3), 568–575.

39  
40  
41 Richardson EA, Pearce J, Mitchell R, Kingham S. Role of physical activity in the  
42 relationship between urban green space and health. *Public Health*. 2013  
43 Apr;127(4):318-24. doi: 10.1016/j.puhe.2013.01.004. Epub 2013 Apr 12.

44  
45  
46 Rodríguez DA, Cho GH, Evenson KR, Conway TL, Cohen D, Ghosh-Dastidar B,  
47 Pickrel JL, Veblen-Mortenson S, Lytle LA. Out and about: association of the built  
48 environment with physical activity behaviors of adolescent females. *Health Place*. 2012  
49 Jan;18(1):55-62.

50  
51 Samara T and Tsitsoni T, *Road traffic noise reduction by vegetation in the city ring  
52 road of a big city*, in *Proceedings of the International Conference on Environmental  
53 Management, Engineering, Planning and Economics*, Kungolos A, Aravossis K,  
54 Karagiannidis A, and Samaras P, Editors. 2007: Skiathos. p. 2591-2596.

55  
56 Scottish Executive. (2003). Let's make Scotland more active: A strategy for physical  
57 activity. Edinburgh: Physical Activity Task Force.

1  
2  
3 Schwanen T, Dijst M, Dieleman FM. 2002. A microlevel analysis of residential context  
4 and travel time. *Environ Plan A* 34(8):1487-1508.

5  
6  
7 Schwarz, N. Retrospective and concurrent self-reports: The rationale for real-time data  
8 capture. In: Stone A, Shiffman S, Atienza AA, Nebeling L, eds. *The Science of Real-*  
9 *Time Data Capture*. Oxford University Press: New York; 2007: 11-26.

10  
11 Shiffman S, Stone AA, Hufford MR. Ecological momentary assessment. *Annu Rev Clin*  
12 *Psychol.* 2008;4:1-32

13  
14 Sullivan, W. C., Kuo, F. E., & Depooter, S. F. (2004). The fruit of urban nature: Vital  
15 neighbourhood spaces. *Environment and Behavior*, 36, 678–700.

16  
17 Stigsdotter UK, Ekholm O, Schipperijn J, Toftager M, Kamper-jørgensen F and  
18 Randrup TB. Health promoting outdoor environments – associations between green  
19 space, and health, health-related quality of life and stress based on a Danish national  
20 representative survey. *Scandinavian Journal of Public Health*, 2010; 0: 1–7

21  
22 Su JG, Jerrett M, de Nazelle A, Wolch J. Does exposure to air pollution in urban parks  
23 have socioeconomic, racial or ethnic gradients? *Environ Res.* 2011 Apr;111(3):319-28.

24  
25 Takano, T., Nakamura, K., & Watanabe, M. (2002). Urban residential environments  
26 and senior citizens' longevity in megacity areas: The importance of walkable  
27 green spaces. *Journal of Epidemiological Community Health*, 56, 913–918.

28  
29 Thompson Coon, J., Boddy, K., Stein, K., Whear, R., Barton, J., & Depledge, M. H.  
30 (2011). Does Participating in Physical Activity in Outdoor Natural Environments Have  
31 a Greater Effect on Physical and Mental Wellbeing than Physical Activity Indoors? A  
32 Systematic Review. *Environmental Science & Technology*, 45(5), 1761-1772. doi:  
33 10.1021/es102947t

34  
35 Toftager M, Ekholm O, Schipperijn J, Stigsdotter U, Bentsen P, Grønbæk M, Randrup  
36 TB, Kamper-Jørgensen F. Distance to green space and physical activity: a Danish  
37 national representative survey. *J Phys Act Health.* 2011 Aug;8(6):741-9.

38  
39 Ulrich RS. Views through a Windows may influence recovery from surgery. *Science.*  
40 1984 Apr 27;224(4647):420-1.

41  
42 Ulrich, R. S., Simons, R. F., Losito, B. D., Fiorito, E., Miles, M. A., & Zelson, M.  
43 (1991). Stress recovery during exposure to natural and urban environments. *Journal of*  
44 *Environmental Psychology*, 11, 201–230.

45  
46 van den Berg, A., & Custers, M. H. G. (2011). Gardening promotes neuroendocrine  
47 and affective restoration from stress. *Journal of Health Psychology*, 16(1), 3–11.

48  
49 van den Berg, A. E., Koole, S. L., & van der Wulp, N. Y. (2003). Environmental  
50 preference and restoration: (How) are they related? *Journal of Environmental*  
51 *Psychology*, 23(2), 135–146.

1  
2  
3  
4 van den Berg, A., Maas, J., Verheij, R. A., & Groenewegen, P. P. (2010). Green space  
5 as a buffer between negative life events and health. *Social Science & Medicine*,  
6 70(8), 1203–1210.  
7

8 Villeneuve PJ, Jerrett M, Su JG, Burnett R, Chen H, Wheeler AJ, Goldberg MS. A  
9 cohort study relating urban green space with mortality in Ontario, Canada. *Environ*  
10 *Res.* 2012 May;115:51-8  
11

12 Völker S and Kistemann T. “I’m always entirely happy when I’m here!” Urban blue  
13 enhancing human health and well-being in Cologne and Düsseldorf, Germany. *Social*  
14 *Science & Medicine* 2013 Feb;78:113-24  
15

16 Völker S, Kistemann T. The impact of blue space on human health and well-being -  
17 Salutogenetic health effects of inland surface waters: a review. *Int J Hyg*  
18 *Environ Health.* 2011 Nov;214(6):449-60.  
19

20 Weier J, Herring D. Measuring vegetation (NDVI & EVI). <http://earthobservatory.nasa.gov/Features/MeasuringVegetation/:NASA2011>. Accessed in January 2011  
21

22 White MP, Alcock I, Wheeler BW, Depledge MH. Coastal proximity, health and well-  
23 being: Results from a longitudinal panel survey. *Health Place.* 2013 Sep;23:97-103.  
24

25 Wolch J, Jerrett M, Reynolds K, McConnell R, Chang R, Dahmann N, Brady K,  
26 Gilliland F, Su JG, Berhane K. Childhood obesity and proximity to urban parks and  
27 recreational resources: A longitudinal cohort study. *Health & Place* 17 (2011) 207–214  
28

29 Wolfe MK, Jeremy Mennis J. Does vegetation encourage or suppress urban crime?  
30 Evidence from Philadelphia, PA. *Landscape and Urban Planning* 108 (2012) 112– 122  
31

32 Wright J, Small N, Raynor P, Tuffnell D, Bhopal R, Cameron N, Fairley L, Lawlor DA,  
33 Parslow R, Petherick ES, Pickett KE, Waiblinger D, and West J. on behalf of the Born  
34 in Bradford Scientific Collaborators Group. Cohort profile: The Born in Bradford multi-  
35 ethnic family cohort study. *International Journal of Epidemiology* 2012;1–14  
36 doi:10.1093/ije/dys112  
37

38 Zhang M and Kang J, Towards the evaluation, description, and creation of soundscapes  
39 in urban open spaces. *Environ Plann B*, 2007. 34: p. 68-86.  
40  
41  
42  
43  
44  
45  
46  
47  
48  
49  
50  
51  
52  
53  
54  
55  
56  
57  
58  
59  
60

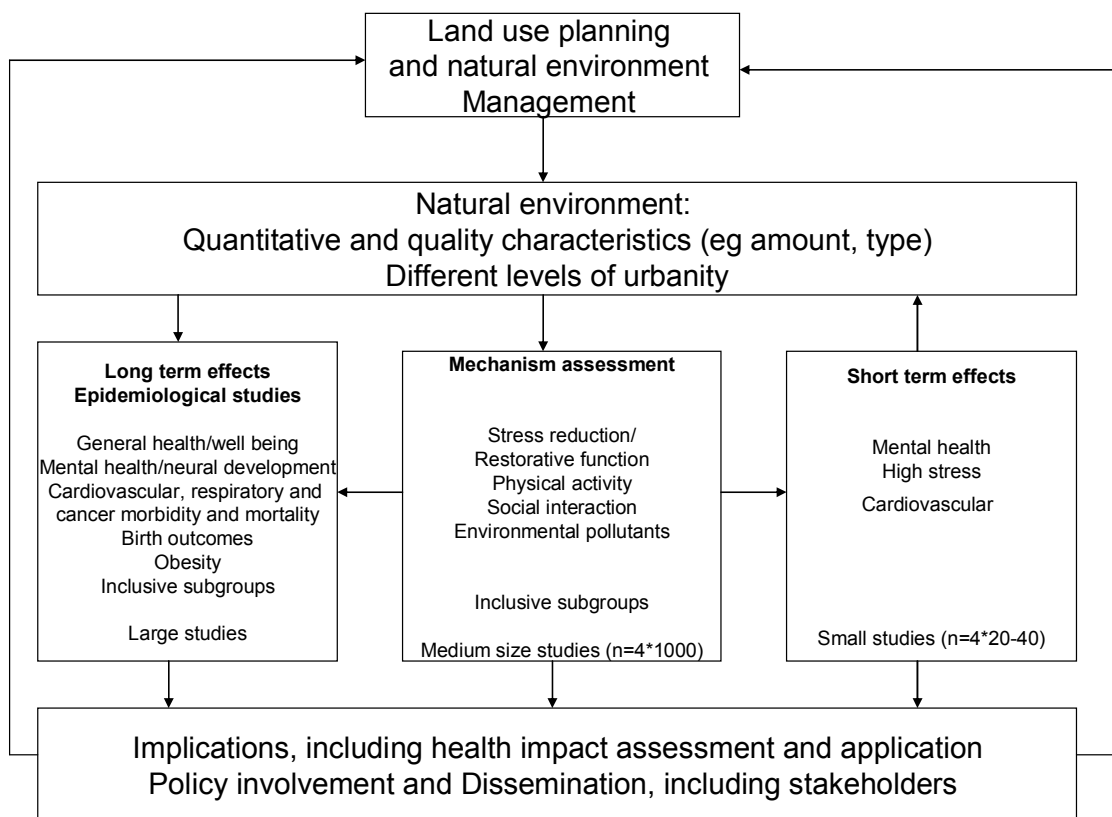

Figure 1: Interdependencies of different parts of the PHENOTYPE project

View only

1  
2  
3 Table 1 PHENOTYPE study mechanisms, outcomes, populations and regions  
4  
5

6 It will explore underlying mechanisms related to:

- 7     ▪ stress reduction/restorative function
- 8     ▪ physical activity
- 9     ▪ social interaction/social cohesion
- 10     exposure to environmental hazards (e.g. noise/acoustic quality, air pollution)
- 11

12 Both preventative and therapeutic effects (patients) will be considered. Outcomes of  
13 interest that are evaluated are:

- 14     ▪ general health and well-being (including medically unexplained symptoms
- 15     ▪ (MUPS))
- 16     ▪ mental health/neural development
- 17     ▪ stress
- 18     ▪ cardiovascular, cancer and respiratory mortality and morbidity
- 19     ▪ birth outcomes
- 20     ▪ obesity
- 21
- 22
- 23

24 It will examine the effects for different population groups, including more vulnerable  
25 populations:

- 26     ▪ pregnant women and/or foetus
- 27     ▪ age groups (children, elderly)
- 28     ▪ (lower) socio-economic status
- 29     ▪ ethnic minorities
- 30     ▪ patients/people with specific health complaints
- 31

32 It will conduct comparative studies in different regions of Europe to examine any  
33 underlying regional, social and/or cultural differences related to the meanings, uses,  
34 mechanisms and health effects of the natural environment and we will include the:

- 35     ▪ North west (Netherlands, England)
- 36     ▪ South (Spain)
- 37     ▪ East (Lithuania)
- 38
- 39
- 40
- 41
- 42
- 43
- 44
- 45
- 46
- 47
- 48
- 49
- 50
- 51
- 52
- 53
- 54
- 55
- 56
- 57
- 58
- 59
- 60

Table 2 Limitations of current green space work and work undertaken by PHENOTYPE to address these

| Limitations of current available work                                                                                                                                                                                                          | What PHENOTYPE will do                                                                                                                                                                                                                                                                                                                                                                                                                                                                                                                                                                                                               |
|------------------------------------------------------------------------------------------------------------------------------------------------------------------------------------------------------------------------------------------------|--------------------------------------------------------------------------------------------------------------------------------------------------------------------------------------------------------------------------------------------------------------------------------------------------------------------------------------------------------------------------------------------------------------------------------------------------------------------------------------------------------------------------------------------------------------------------------------------------------------------------------------|
| <ul style="list-style-type: none"> <li>▪ Inconsistency and variation in indicators for green or natural space have often made it difficult to compare results from different studies.</li> </ul>                                               | <ul style="list-style-type: none"> <li>▪ Minimize the potential differences due to classification of natural space, by combining the use of conventional maps and data sources with remote sensing data and aerial photography, gather individual-level data through detailed discussions with subjects living in the areas, and use considerable stakeholder engagement to develop comparable classifications of the natural environment in different countries.</li> <li>▪ Produce a more robust and comparable evidence base on links between exposure to natural outdoor environment and human health and well-being.</li> </ul> |
| <ul style="list-style-type: none"> <li>▪ A number of disease outcomes have been studied, but besides the routinely collected data (which use ICD coding), not always in a standardized and comparable manner in different countries</li> </ul> | <ul style="list-style-type: none"> <li>▪ Produce a more robust and comparable evidence base on links between exposure to natural outdoor environment and human health and well-being, using well studied and new outcomes with standardization between countries.</li> </ul>                                                                                                                                                                                                                                                                                                                                                         |
| <ul style="list-style-type: none"> <li>▪ Potentially very sensitive groups such as pregnant women/fetus have not been studied at all.</li> </ul>                                                                                               | <ul style="list-style-type: none"> <li>▪ Extend the evidence base to new outcomes and vulnerable populations e.g. pregnant women and their foetus, chronic respiratory and cardiovascular patients, ethnic minorities and</li> </ul>                                                                                                                                                                                                                                                                                                                                                                                                 |

1  
2  
3  
4  
5  
6  
7  
8  
9  
10  
11  
12  
13  
14  
15  
16  
17  
18  
19  
20  
21  
22  
23  
24  
25  
26  
27  
28  
29  
30  
31  
32  
33  
34  
35  
36  
37  
38  
39  
40  
41  
42  
43  
44  
45  
46  
47  
48  
49

|                                                                                                                                                                                                                                      |                                                                                                                                                                                                                                                                            |
|--------------------------------------------------------------------------------------------------------------------------------------------------------------------------------------------------------------------------------------|----------------------------------------------------------------------------------------------------------------------------------------------------------------------------------------------------------------------------------------------------------------------------|
|                                                                                                                                                                                                                                      | low social economic class.                                                                                                                                                                                                                                                 |
| <ul style="list-style-type: none"> <li>Most studies focused on green space; the evidence base for the effects of blue space is very limited.</li> </ul>                                                                              | <ul style="list-style-type: none"> <li>Not only examine the effects of green space, but also of blue space.</li> </ul>                                                                                                                                                     |
| <ul style="list-style-type: none"> <li>Most of the green space studies have been conducted in the US or the North West of Europe.</li> </ul>                                                                                         | <ul style="list-style-type: none"> <li>Conduct comparable studies across Europe and produce evidence for North Western, Eastern and Southern Europe. This will deliver insights into regional, social and/or cultural differences in relation to natural space.</li> </ul> |
| <ul style="list-style-type: none"> <li>Most studies do not include actual use of the natural environment.</li> </ul>                                                                                                                 | <ul style="list-style-type: none"> <li>Consider actual use of the natural environment, an often neglected but fundamental indicator in relation to exposure to natural environments.</li> </ul>                                                                            |
| <ul style="list-style-type: none"> <li>There appeared to be differences by social group, with some apparently benefiting more than others from natural space, but the evidence is sparse.</li> </ul>                                 | <ul style="list-style-type: none"> <li>Produce a more robust and comparable evidence base on links between exposure to natural outdoor environment and human health and well-being, with special attention for effect modification by social groups</li> </ul>             |
| <ul style="list-style-type: none"> <li>A number of potential mechanisms have been suggested, including increased physical activity and social contacts for those living near natural space, natural environments exerting</li> </ul> | <ul style="list-style-type: none"> <li>Examine the proposed mechanisms (physical activity, stress, social contacts, and environmental risk factors) simultaneously in a large sample in various countries (WP2). This will enable</li> </ul>                               |



|                                                                                                                                                                                                                                                                                                                                                                                                                                                                                                                                            |                                                                                                                                                                                                                                                                                                                                                                                      |
|--------------------------------------------------------------------------------------------------------------------------------------------------------------------------------------------------------------------------------------------------------------------------------------------------------------------------------------------------------------------------------------------------------------------------------------------------------------------------------------------------------------------------------------------|--------------------------------------------------------------------------------------------------------------------------------------------------------------------------------------------------------------------------------------------------------------------------------------------------------------------------------------------------------------------------------------|
| <p>stress lowering or attention restoring effects, and reducing environmental hazards (e.g. air pollution, high temperatures). However, the studies of potential mechanisms have often been limited to assessing one mechanism at the time, which increases the likelihood of unmeasured confounding effects and misses the opportunity to study these potentially interrelated mechanisms in coherence.</p> <ul style="list-style-type: none"> <li>▪ to study the mechanisms in coherence even though they may be interrelated</li> </ul> | <p>us to study specific factors while adjusting for others, and thereby strengthening the interpretation of the results</p>                                                                                                                                                                                                                                                          |
| <ul style="list-style-type: none"> <li>▪ Unable to answer what specific quantitative and qualitative characteristics of the natural environment have a positive effect on health and well-being, through what pathways is still largely unknown.</li> </ul>                                                                                                                                                                                                                                                                                | <ul style="list-style-type: none"> <li>▪ Make classifications for the type and level of the indicators, which is important for policy makers.</li> <li>▪ Examine the importance of both quantitative (amount, type, access, use) and qualitative characteristics (acoustic quality, identity, variety, safety) of the natural environment</li> </ul>                                 |
| <ul style="list-style-type: none"> <li>▪ Limited research exploring the sustained affective, cognitive and physiological responses to a single exposure and the effects of a repeated exposure to the same natural environment</li> <li>▪ Unable to explain how policymakers and planners can design a natural environment to maximise health benefits</li> </ul>                                                                                                                                                                          | <ul style="list-style-type: none"> <li>▪ Explore longer-term changes in affect, cognitive function and physiological indicators that have to date only been studied during, or immediately after, engagement with the natural environment.</li> <li>▪ Explore the immediate, maintained and long-term effects of repeated engagement with the same natural environment on</li> </ul> |

1  
2  
3  
4  
5  
6  
7  
8  
9  
10  
11  
12  
13  
14  
15  
16  
17  
18  
19  
20  
21  
22  
23  
24  
25  
26  
27  
28  
29  
30  
31  
32  
33  
34  
35  
36  
37  
38  
39  
40  
41  
42  
43  
44  
45  
46  
47  
48  
49

|                                                                                                                                               |                                                                                                                                |
|-----------------------------------------------------------------------------------------------------------------------------------------------|--------------------------------------------------------------------------------------------------------------------------------|
|                                                                                                                                               | affect, cognitive function, and physiological indicators of well-being .                                                       |
| <ul style="list-style-type: none"> <li>▪ Guidelines of lifestyle, health and well being have largely undervalued local populations</li> </ul> | <ul style="list-style-type: none"> <li>▪ Include lifestyle, health and well being factors of the local populations.</li> </ul> |

For peer review only

Annex-websfigures

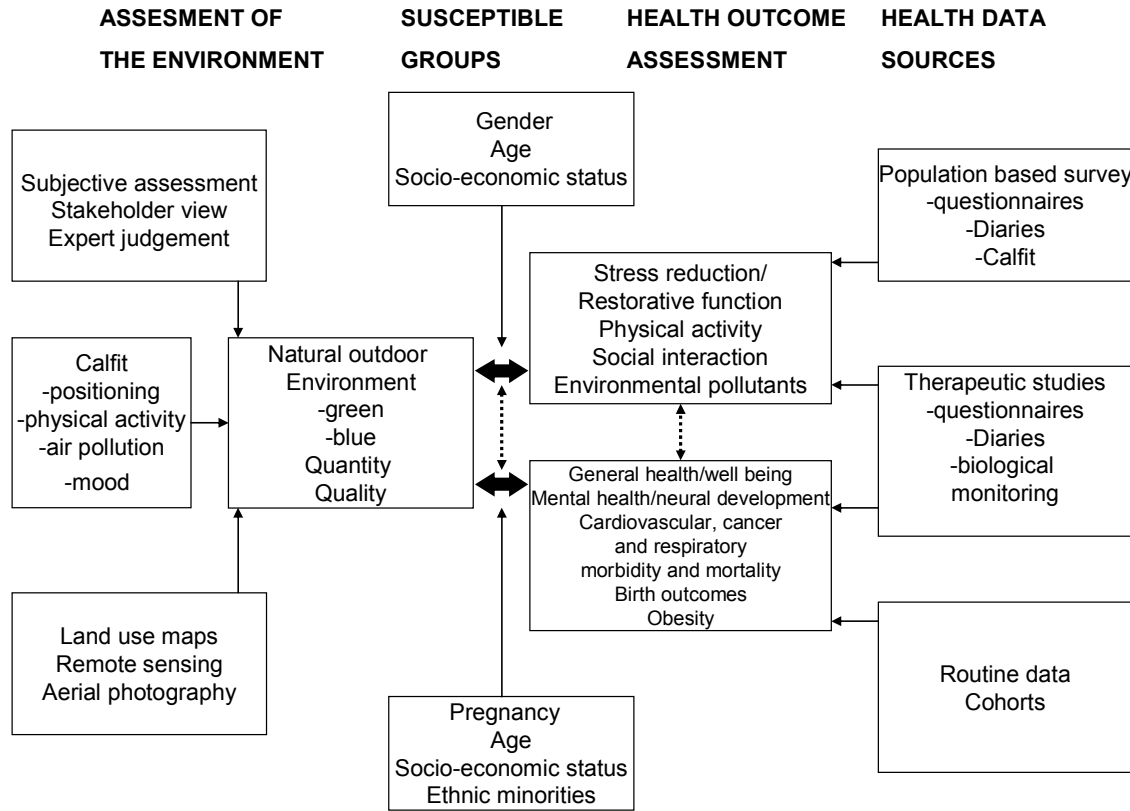

Web Figure 1 Natural outdoor environment, mechanisms and health data input in PHENOTYPE

1  
2  
3  
4  
5  
6  
7  
8  
9  
10  
11  
12  
13  
14  
15  
16  
17  
18  
19  
20  
21  
22  
23  
24  
25  
26  
27  
28  
29  
30  
31  
32  
33  
34  
35  
36  
37  
38  
39  
40  
41  
42  
43  
44  
45  
46  
47  
48  
49

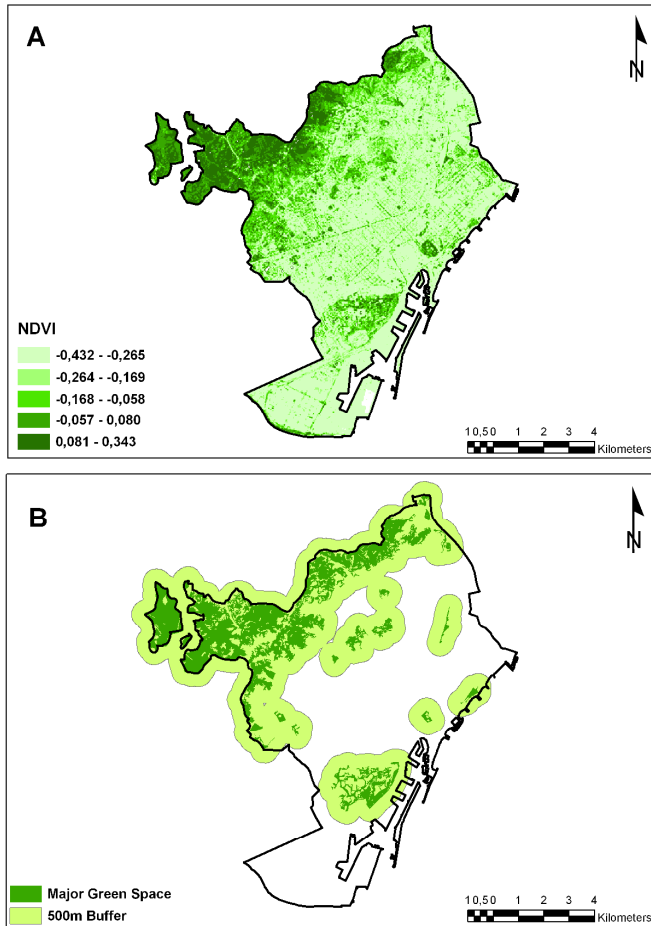

er review only

Web Figure 2 NDVI map of Barcelona and buffers around major green space areas

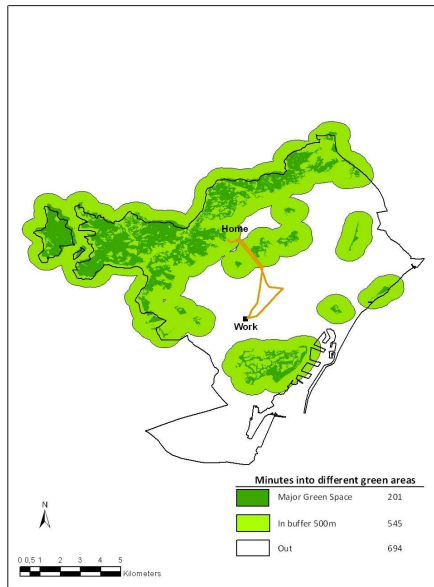

peer review only

Web Figure 3 Mobility pattern for a subject in Barcelona obtained with the Calfit tool

1  
2  
3  
4  
5  
6  
7  
8  
9  
10  
11  
12  
13  
14  
15  
16  
17  
18  
19  
20  
21  
22  
23  
24  
25  
26  
27  
28  
29  
30  
31  
32  
33  
34  
35  
36  
37  
38  
39  
40  
41  
42  
43  
44  
45  
46  
47  
48  
49

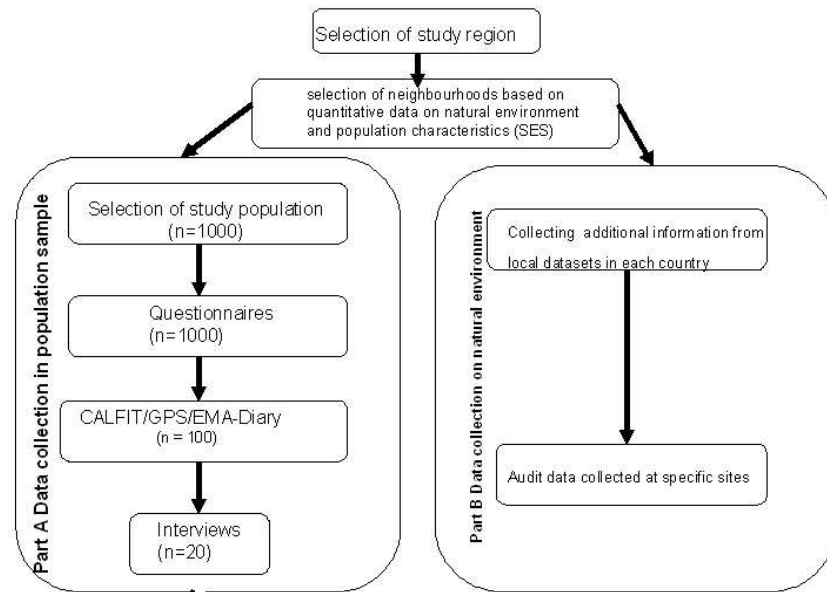

36 Web Figure 4 Design of data collection in 4 European case cities to study the underlying mechanism

1  
2  
3  
4  
5  
6  
7  
8  
9  
10  
11  
12  
13  
14  
15  
16  
17  
18  
19  
20  
21  
22  
23  
24  
25  
26  
27  
28  
29  
30  
31  
32  
33  
34  
35  
36  
37  
38  
39  
40  
41  
42  
43  
44  
45  
46  
47  
48  
49

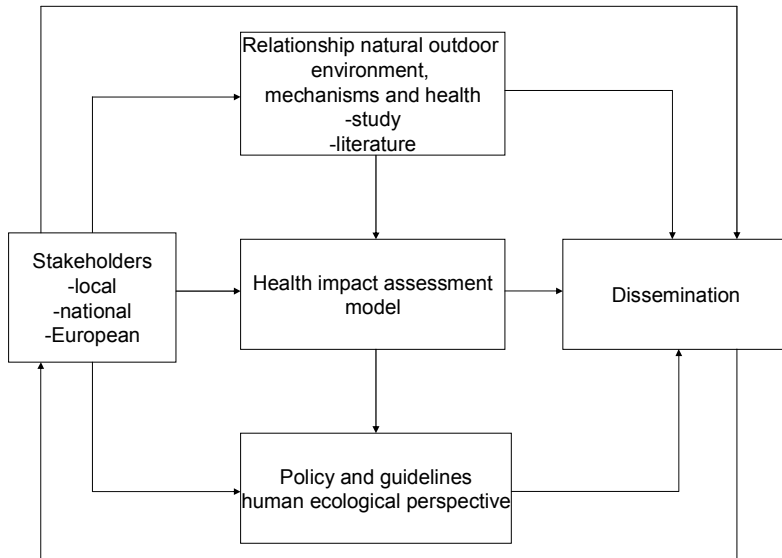

Web Figure 5 Stakeholder input and dissemination

review only

1  
2  
3  
4  
5  
6  
7  
8  
9  
10  
11  
12  
13  
14  
15  
16  
17  
18  
19  
20  
21  
22  
23  
24  
25  
26  
27  
28  
29  
30  
31  
32  
33  
34  
35  
36  
37  
38  
39  
40  
41  
42  
43  
44  
45  
46  
47  
48  
49

Web Table 1 Currently available databases and cohorts for inclusion in PHENOTYPE

| Study       | n    | Population                                                     | Collected outcomes                                                                                                                                                                                                    | Relevant covariate and mechanism data                                  |
|-------------|------|----------------------------------------------------------------|-----------------------------------------------------------------------------------------------------------------------------------------------------------------------------------------------------------------------|------------------------------------------------------------------------|
| CREAL Spain |      |                                                                |                                                                                                                                                                                                                       |                                                                        |
| PISCINA     | 3000 | Children 6-9, 2006, Sabadell, Catalonia                        | Respiratory health<br>BMI                                                                                                                                                                                             | Social economic status<br>Physical activity<br>Air pollution           |
| INMA        | 3000 | Children, 2-10, ongoing around Spain                           | Birth weight and gestation, respiratory health, neural development                                                                                                                                                    | Social economic status<br>Physical activity<br>Stress<br>Air pollution |
| PAC-COPD    | 342  | Patients with chronic obstructive pulmonary disease (PAC-CODP) | Hospital admissions<br>All cause and specific mortality<br>Functional data (lung function, cardiovascular function)<br>Symptoms and co-morbidities<br>Quality of life<br>Mental status<br>Body weight and composition | Social economic status<br>Physical activity<br>Air pollution           |



|                                                  |                                                   |                                                                                                                                                 |                                                                                                             |                                                              |
|--------------------------------------------------|---------------------------------------------------|-------------------------------------------------------------------------------------------------------------------------------------------------|-------------------------------------------------------------------------------------------------------------|--------------------------------------------------------------|
| ECRHS                                            | 8500                                              | Adult population in many cities around Europe                                                                                                   | Respiratory health<br>Short form SF36                                                                       | Social economic status<br>Physical activity<br>Air pollution |
| Routine data<br>Catalonia                        | Pop 7M<br>0.5 million<br>deaths                   | All, 1999-2006, Catalonia                                                                                                                       | All cause and specific<br>mortality                                                                         | Social economic<br>status                                    |
| Hospital clinic<br>database                      | 16000                                             | Births, 2000-2005 Barcelona                                                                                                                     | Birth weight and<br>gestation                                                                               | Social economic<br>status<br>Air pollution                   |
| Netherlands                                      |                                                   |                                                                                                                                                 |                                                                                                             |                                                              |
| Cohort of<br>Dutch<br>inhabitants<br>Netherlands | Pop 16M                                           | All, 2000-2008                                                                                                                                  | All cause and specific<br>mortality and morbidity                                                           | Social economic<br>status                                    |
| Doetinchem<br>cohort                             | Approximately<br>5000 over a<br>period of 5 years | See: Verschuren WMM, Blokstra A, Picavet HSJ, Smit HA.<br>The Doetinchem cohort study (cohort profile) Int J Epidemiol<br>2008; 37(6):1236-1241 | Body weight, serum<br>cholesterol, mortality,<br>morbidity, health-<br>related quality of life<br>(RAND-36) | Social economic<br>status, physical<br>activity              |
| Health survey<br>Utrecht                         | 3475                                              | Adults 3475 (19-99 years)                                                                                                                       | lifestyle, perceived<br>health, chronic diseases                                                            | Socioeconomic<br>status, physical<br>activity                |
| United<br>Kingdom                                |                                                   |                                                                                                                                                 |                                                                                                             |                                                              |
| Born in<br>Bradford                              | 12000                                             | Babies, ongoing, England (large ethnic population) and their<br>parents for a subgroup                                                          | Birth weight and<br>gestation<br>General and mental<br>health parents in a                                  | Social economic<br>status<br>Air pollution<br>Detailed       |

1  
2  
3  
4  
5  
6  
7  
8  
9  
10  
11  
12  
13  
14  
15  
16  
17  
18  
19  
20  
21  
22  
23  
24  
25  
26  
27  
28  
29  
30  
31  
32  
33  
34  
35  
36  
37  
38  
39  
40  
41  
42  
43  
44  
45  
46  
47  
48  
49

|                                              |             |                                                                                                                        |                                                                                                                                                             |                                                                          |
|----------------------------------------------|-------------|------------------------------------------------------------------------------------------------------------------------|-------------------------------------------------------------------------------------------------------------------------------------------------------------|--------------------------------------------------------------------------|
|                                              |             |                                                                                                                        | subset of 1500                                                                                                                                              | ethnicity                                                                |
| Routine hospital emissions/disease incidence |             | Small area-level data for Stoke-on-Trent/Staffordshire                                                                 | Rates and nature of hospital episodes (e.g., respiratory, CVD), morbidity and mortality                                                                     | Social economic status<br>Air pollution                                  |
| National health data                         |             | Small area-level health data for UK                                                                                    | Nature and rates of morbidity and mortality                                                                                                                 | Social economic status<br>Air pollution                                  |
| Lithuania                                    |             |                                                                                                                        |                                                                                                                                                             |                                                                          |
| Routine morbidity data Lithuania             | 0.5 million | Lithuania population, all age groups. Classification of all registered cases causes according to ICD-10 revision codes | Urban-rural area, age, sex, cardiovascular, respiratory, cancer, and other morbidity by districts                                                           | Social and demographic status                                            |
| Routine mortality data Lithuania             | 0.5 million | Lithuania population, all age groups. Classification of all registered cases causes according to ICD-10 revision codes | Urban-rural area, age, sex, cardiovascular, respiratory, cancer, and other morbidity by districts                                                           | Social and demographic status                                            |
| Detailed Health survey                       | 7000        | Representative sample adults of Kaunas citizens, Lithuania                                                             | General health including<br>Blood pressure, high cholesterol and diabetes, Depression<br>Physical functioning<br>Cognitive function<br>Psychosocial factors | Social economic status<br>Air pollution<br>Physical activities<br>Stress |
| Kaunas birth                                 | 4,260       | Kaunas babies and their parents for a subgroup                                                                         | Birth weight and                                                                                                                                            | Social,                                                                  |

|    |        |  |                                                                                                                               |                                 |
|----|--------|--|-------------------------------------------------------------------------------------------------------------------------------|---------------------------------|
| 1  |        |  |                                                                                                                               |                                 |
| 2  |        |  |                                                                                                                               |                                 |
| 3  |        |  |                                                                                                                               |                                 |
| 4  |        |  |                                                                                                                               |                                 |
| 5  |        |  |                                                                                                                               |                                 |
| 6  | cohort |  | <a href="http://www.birthcohorts.net/Cohort.Show.asp?cohortid=87">http://www.birthcohorts.net/Cohort.Show.asp?cohortid=87</a> | gestational age                 |
| 7  |        |  |                                                                                                                               | demographic,<br>economic status |
| 8  |        |  |                                                                                                                               | Air pollution                   |
| 9  |        |  |                                                                                                                               |                                 |
| 10 |        |  |                                                                                                                               |                                 |
| 11 |        |  |                                                                                                                               |                                 |
| 12 |        |  |                                                                                                                               |                                 |
| 13 |        |  |                                                                                                                               |                                 |
| 14 |        |  |                                                                                                                               |                                 |
| 15 |        |  |                                                                                                                               |                                 |
| 16 |        |  |                                                                                                                               |                                 |
| 17 |        |  |                                                                                                                               |                                 |
| 18 |        |  |                                                                                                                               |                                 |
| 19 |        |  |                                                                                                                               |                                 |
| 20 |        |  |                                                                                                                               |                                 |
| 21 |        |  |                                                                                                                               |                                 |
| 22 |        |  |                                                                                                                               |                                 |
| 23 |        |  |                                                                                                                               |                                 |
| 24 |        |  |                                                                                                                               |                                 |
| 25 |        |  |                                                                                                                               |                                 |
| 26 |        |  |                                                                                                                               |                                 |
| 27 |        |  |                                                                                                                               |                                 |
| 28 |        |  |                                                                                                                               |                                 |
| 29 |        |  |                                                                                                                               |                                 |
| 30 |        |  |                                                                                                                               |                                 |
| 31 |        |  |                                                                                                                               |                                 |
| 32 |        |  |                                                                                                                               |                                 |
| 33 |        |  |                                                                                                                               |                                 |
| 34 |        |  |                                                                                                                               |                                 |
| 35 |        |  |                                                                                                                               |                                 |
| 36 |        |  |                                                                                                                               |                                 |
| 37 |        |  |                                                                                                                               |                                 |
| 38 |        |  |                                                                                                                               |                                 |
| 39 |        |  |                                                                                                                               |                                 |
| 40 |        |  |                                                                                                                               |                                 |
| 41 |        |  |                                                                                                                               |                                 |
| 42 |        |  |                                                                                                                               |                                 |
| 43 |        |  |                                                                                                                               |                                 |
| 44 |        |  |                                                                                                                               |                                 |
| 45 |        |  |                                                                                                                               |                                 |
| 46 |        |  |                                                                                                                               |                                 |
| 47 |        |  |                                                                                                                               |                                 |
| 48 |        |  |                                                                                                                               |                                 |
| 49 |        |  |                                                                                                                               |                                 |

For peer review only

1  
2  
3  
4  
5  
6  
7  
8  
9  
10  
11  
12  
13  
14  
15  
16  
17  
18  
19  
20  
21  
22  
23  
24  
25  
26  
27  
28  
29  
30  
31  
32  
33  
34  
35  
36  
37  
38  
39  
40  
41  
42  
43  
44  
45  
46  
47  
48  
49

Web Table 2. Summary of proposed experimental design in each partner country in PHENOTYPE

|             | Country              | Sample                                       | Summary design                                                                                                                                                                                                                              | Measures |                    |                                                                                |                                                       |                                                                 |
|-------------|----------------------|----------------------------------------------|---------------------------------------------------------------------------------------------------------------------------------------------------------------------------------------------------------------------------------------------|----------|--------------------|--------------------------------------------------------------------------------|-------------------------------------------------------|-----------------------------------------------------------------|
|             |                      |                                              |                                                                                                                                                                                                                                             | Affect   | Cognition          | Physiological                                                                  | Environment                                           | Other                                                           |
| Preventive  | UK: study 1          | Healthy adults (n=40)                        | - Field-based<br>- Within-subjects<br>- 30-minute exposure to natural green, natural green/blue, and urban environment<br>- Measures at baseline (pre-exposure), 30 and 60-minutes post exposure                                            | Mood     | Cognitive function | - Salivary cortisol<br>- HR<br>- HRV<br>- BP                                   | Perceived restoration                                 | RPE<br>Walking speed                                            |
|             | UK: study 2          | Healthy adults (n=40)                        | - Field-based<br>- Between groups<br>- 30-minute exposure to natural <i>or</i> urban environment on three consecutive days<br>- Measures at baseline (day 1), 0, 30 and 60-minutes on exposure days (days 2-4) and final follow-up on day 5 | Mood     | Cognitive function | - Salivary cortisol<br>- HR<br>- HRV<br>- BP                                   | Perceived restoration                                 | RPE<br>Walking speed<br>Hedonic and eudemonic life satisfaction |
|             | Netherlands: study 1 | Healthy adults (n=50)                        | - Laboratory-base<br>- Within subjects<br>- Shown images of natural and urban environment before a stressor (model 1) and after a stressor (model 2) stressor (to explore buffering and restorative effects, respectively)                  | Mood     | Cognitive function | - Salivary cortisol<br>- HR<br>- HRV<br>- BP                                   | Perceived restoration                                 |                                                                 |
|             | Netherlands: study 2 | Healthy adults (n=25)                        | - Laboratory-based<br>- Within subjects<br>- Shown images of natural and urban environment before a stressor (model 1) and after a stressor (model 2) stressor (to explore buffering and restorative effects, respectively)                 | Mood     | Cognitive function | - Neurological response (fMRI)<br>- Salivary cortisol<br>- HR<br>- HRV<br>- BP | Perceived restoration                                 |                                                                 |
| Therapeutic | Spain                | Adults with elevated stress levels (n=20-40) | - Field-based<br>- Exposure to natural green, natural green/blue, and urban environment over several hours<br>- Measures at baseline (pre-exposure), 30 and                                                                                 | Mood     | Cognitive function | - Salivary cortisol<br>- HR<br>- HRV<br>- BP                                   | - Perceived restoration<br>- Air pollution<br>- Noise | RPE<br>Walking speed<br>Social interaction                      |

1  
2  
3  
4  
5  
6  
7  
8  
9  
10  
11  
12  
13  
14  
15  
16  
17  
18  
19  
20  
21  
22  
23  
24  
25  
26  
27  
28  
29  
30  
31  
32  
33  
34  
35  
36  
37  
38  
39  
40  
41  
42  
43  
44  
45  
46  
47  
48  
49

|  |           |                        |                                                                                                                                                                                                                                                                                                 |      |                    |                                                                                      |                       |                                |
|--|-----------|------------------------|-------------------------------------------------------------------------------------------------------------------------------------------------------------------------------------------------------------------------------------------------------------------------------------------------|------|--------------------|--------------------------------------------------------------------------------------|-----------------------|--------------------------------|
|  |           |                        | 60-minutes post exposure<br>- Participants given CALFIT phones for some days for longer term monitoring (mood, social interaction, physical activity)                                                                                                                                           |      |                    |                                                                                      | pollution             | and physical activity (CALFIT) |
|  | Lithuania | Adults with CAD (n=20) | - Field-based<br>- Between-subjects<br>- 30-minute exposure to natural green <i>or</i> urban environment on two consecutive days (days 2 and 3)<br>- Measures at baseline (pre-exposure), 30 and 60-minutes post exposure<br>- Walking treadmill test at baseline (day 1) and follow-up (day 2) | Mood | Cognitive function | - Exercise capacity (treadmill test)<br>- Salivary cortisol<br>- HR<br>- HRV<br>- BP | Perceived restoration | RPE<br>Walking speed           |

CAD, coronary artery disease; HR, heart rate; HRV, heart rate variability; BP, blood pressure, RPE, rate of perceived exertion; fMRI, functional magnetic resonance imaging

1  
2  
3  
4  
5  
6  
7  
8  
9  
10  
11  
12  
13  
14  
15  
16  
17  
18  
19  
20  
21  
22  
23  
24  
25  
26  
27  
28  
29  
30  
31  
32  
33  
34  
35  
36  
37  
38  
39  
40  
41  
42  
43  
44  
45  
46  
47  
48  
49

For peer review only

# BMJ Open

## POSITIVE HEALTH EFFECTS OF THE NATURAL OUTDOOR ENVIRONMENT IN TYPICAL POPULATIONS IN DIFFERENT REGIONS IN EUROPE (PHENOTYPE)-A STUDY PROGRAMME PROTOCOL

|                               |                                                                                                                                                                                                                                                                                                                                                                                                                                                                                                                                                                                                                                                                                                                                                                                                                                                                                                                                                                                                                                                                                                                                                                                                                                                                                                                                                                                                                                                                                                                                                                                                                                                                                                                                                                                                                                                                                                                                                                                                                                                                                                                                                                                                                                                                 |
|-------------------------------|-----------------------------------------------------------------------------------------------------------------------------------------------------------------------------------------------------------------------------------------------------------------------------------------------------------------------------------------------------------------------------------------------------------------------------------------------------------------------------------------------------------------------------------------------------------------------------------------------------------------------------------------------------------------------------------------------------------------------------------------------------------------------------------------------------------------------------------------------------------------------------------------------------------------------------------------------------------------------------------------------------------------------------------------------------------------------------------------------------------------------------------------------------------------------------------------------------------------------------------------------------------------------------------------------------------------------------------------------------------------------------------------------------------------------------------------------------------------------------------------------------------------------------------------------------------------------------------------------------------------------------------------------------------------------------------------------------------------------------------------------------------------------------------------------------------------------------------------------------------------------------------------------------------------------------------------------------------------------------------------------------------------------------------------------------------------------------------------------------------------------------------------------------------------------------------------------------------------------------------------------------------------|
| Journal:                      | <i>BMJ Open</i>                                                                                                                                                                                                                                                                                                                                                                                                                                                                                                                                                                                                                                                                                                                                                                                                                                                                                                                                                                                                                                                                                                                                                                                                                                                                                                                                                                                                                                                                                                                                                                                                                                                                                                                                                                                                                                                                                                                                                                                                                                                                                                                                                                                                                                                 |
| Manuscript ID:                | bmjopen-2014-004951.R1                                                                                                                                                                                                                                                                                                                                                                                                                                                                                                                                                                                                                                                                                                                                                                                                                                                                                                                                                                                                                                                                                                                                                                                                                                                                                                                                                                                                                                                                                                                                                                                                                                                                                                                                                                                                                                                                                                                                                                                                                                                                                                                                                                                                                                          |
| Article Type:                 | Protocol                                                                                                                                                                                                                                                                                                                                                                                                                                                                                                                                                                                                                                                                                                                                                                                                                                                                                                                                                                                                                                                                                                                                                                                                                                                                                                                                                                                                                                                                                                                                                                                                                                                                                                                                                                                                                                                                                                                                                                                                                                                                                                                                                                                                                                                        |
| Date Submitted by the Author: | 28-Feb-2014                                                                                                                                                                                                                                                                                                                                                                                                                                                                                                                                                                                                                                                                                                                                                                                                                                                                                                                                                                                                                                                                                                                                                                                                                                                                                                                                                                                                                                                                                                                                                                                                                                                                                                                                                                                                                                                                                                                                                                                                                                                                                                                                                                                                                                                     |
| Complete List of Authors:     | <p>Nieuwenhuijsen, Mark; Center for Research in Environmental Epidemiology (CREAL) - Universitat Pompeu Fabra (UPF), Research Professor in Environmental Epidemiol; Consortium for Biomedical Research in Epidemiology and Public Health (CIBER en Epidemiología y Salud Pública-CIBERESP),</p> <p>Kruize, Hanneke; National Institute for Public Health and the Environment,, Centre of Environmental Health Research</p> <p>Gidlow, Christopher; CSHER,</p> <p>Andrusaityte, Sandra; Vytauto Didziojo Universitetas,</p> <p>Anto, Joseph; /; Center for Research in Environmental Epidemiology (CREAL) - Universitat Pompeu Fabra (UPF) - IMIM (Hospital del Mar Medical Research Institute) - CIBERESP,</p> <p>Basagana, Xavier; Center for Research in Environmental Epidemiology (CREAL) - Universitat Pompeu Fabra (UPF), Research Professor in Environmental Epidemiol; Consortium for Biomedical Research in Epidemiology and Public Health (CIBER en Epidemiología y Salud Pública-CIBERESP),</p> <p>Cirach, Marta; Center for Research in Environmental Epidemiology (CREAL) - Universitat Pompeu Fabra (UPF), Research Professor in Environmental Epidemiol; Consortium for Biomedical Research in Epidemiology and Public Health (CIBER en Epidemiología y Salud Pública-CIBERESP),</p> <p>Dadvand, Payam; Center for Research in Environmental Epidemiology (CREAL) - Universitat Pompeu Fabra (UPF), Research Professor in Environmental Epidemiol; Consortium for Biomedical Research in Epidemiology and Public Health (CIBER en Epidemiología y Salud Pública-CIBERESP),</p> <p>Danileviciute, Asta; Vytauto Didziojo Universitetas,</p> <p>Donaire-Gonzalez, David; Center for Research in Environmental Epidemiology (CREAL) - Universitat Pompeu Fabra (UPF), Research Professor in Environmental Epidemiol; Consortium for Biomedical Research in Epidemiology and Public Health (CIBER en Epidemiología y Salud Pública-CIBERESP),</p> <p>Garcia-Aymerich, Judith; Center for Research in Environmental Epidemiology (CREAL) - Universitat Pompeu Fabra (UPF), Research Professor in Environmental Epidemiol; Consortium for Biomedical Research in Epidemiology and Public Health (CIBER en Epidemiología y Salud Pública-CIBERESP),</p> |

|                                    |                                                                                                                                                                                                                                                                                                                                                                                                                                                                                                                                                                                                                                                                                                                                                                                                                                                                                                                                                                                                                                                                                                                                                                                                                                                                                                                                                                                                                                                                                                                                      |
|------------------------------------|--------------------------------------------------------------------------------------------------------------------------------------------------------------------------------------------------------------------------------------------------------------------------------------------------------------------------------------------------------------------------------------------------------------------------------------------------------------------------------------------------------------------------------------------------------------------------------------------------------------------------------------------------------------------------------------------------------------------------------------------------------------------------------------------------------------------------------------------------------------------------------------------------------------------------------------------------------------------------------------------------------------------------------------------------------------------------------------------------------------------------------------------------------------------------------------------------------------------------------------------------------------------------------------------------------------------------------------------------------------------------------------------------------------------------------------------------------------------------------------------------------------------------------------|
|                                    | <p>Jerrett, Michael; UCB, University of California,<br/>         Jones, Marc; CSHER,<br/>         Julvez, Jordi; Center for Research in Environmental Epidemiology (CREAL)<br/>         - Universitat Pompeu Fabra (UPF), Research Professor in Environmental<br/>         Epidemiol; Consortium for Biomedical Research in Epidemiology and Public<br/>         Health (CIBER en Epidemiología y Salud Pública-CIBERESP),<br/>         Van Kempen, Elise; National Institute for Public Health and the<br/>         Environment, Centre for Environmental Health Research<br/>         van Kamp, Irene; RIVM, cMGO<br/>         Maas, Jolanda; VUMC,<br/>         Seto, Edmund; UCB, University of California,<br/>         Smith, Graham; CSHER,<br/>         Triguero, Margarita; Center for Research in Environmental Epidemiology<br/>         (CREAL) - Universitat Pompeu Fabra (UPF), Research Professor in<br/>         Environmental Epidemiol; Consortium for Biomedical Research in<br/>         Epidemiology and Public Health (CIBER en Epidemiología y Salud Pública-<br/>         CIBERESP),<br/>         Wendel-Vos, Wanda; National Institute for Public Health and the<br/>         Environment,<br/>         Wright, John; Bradford Hospital Trust,<br/>         Zufferey, Joris; University of Geneva,<br/>         van den Hazel, Peter; VGGM,<br/>         Lawrence, Roderick; University of Geneva,<br/>         Grazuleviciene, Regina; Vytautas Magnus University, Environmental<br/>         Sciences</p> |
| <b>Primary Subject<br>Heading</b>: | Public health                                                                                                                                                                                                                                                                                                                                                                                                                                                                                                                                                                                                                                                                                                                                                                                                                                                                                                                                                                                                                                                                                                                                                                                                                                                                                                                                                                                                                                                                                                                        |
| Secondary Subject Heading:         | Epidemiology, Public health, Occupational and environmental medicine                                                                                                                                                                                                                                                                                                                                                                                                                                                                                                                                                                                                                                                                                                                                                                                                                                                                                                                                                                                                                                                                                                                                                                                                                                                                                                                                                                                                                                                                 |
| Keywords:                          | Green space, Blue space, Health, Well being, Physical activity                                                                                                                                                                                                                                                                                                                                                                                                                                                                                                                                                                                                                                                                                                                                                                                                                                                                                                                                                                                                                                                                                                                                                                                                                                                                                                                                                                                                                                                                       |

SCHOLARONE™  
Manuscripts

only



1  
2  
3 **POSITIVE HEALTH EFFECTS OF THE NATURAL OUTDOOR ENVIRONMENT**  
4 **IN TYPICAL POPULATIONS IN DIFFERENT REGIONS IN EUROPE**  
5  
6 **(PHENOTYPE)-A STUDY PROGRAMME PROTOCOL**  
7  
8  
9

10  
11 Mark J Nieuwenhuijsen<sup>1,2,11</sup>, Hanneke Kruize<sup>3</sup>, Christopher Gidlow<sup>4</sup>, Sandra  
12 Andrusaityte<sup>5</sup>, Josep Maria Antó<sup>1,2,11,12</sup>, Xavier Basagaña<sup>1,2,11</sup>, Marta Cirach<sup>1,2,11</sup>, Payam  
13 Dadvand<sup>1,2,11</sup>, Asta Danileviciute<sup>5</sup>, David Donaire<sup>1,2,11</sup>, Judith Garcia<sup>1,2,11</sup>, Michael  
14 Jerrett<sup>9</sup>, Marc Jones<sup>4</sup>, Jordi Julvez<sup>1,2,11,12</sup>, Elise van Kempen<sup>3</sup>, Irene van Kamp<sup>3</sup>, Jolanda  
15 Maas<sup>7</sup>, Edmund Seto<sup>9</sup>, Graham Smith<sup>4</sup>, Margarita Triguero<sup>1,2,11</sup>, Wanda Wendel-Vos<sup>3</sup>,  
16 John Wright<sup>10</sup>, Joris Zufferey<sup>6</sup>, Peter Jan van den Hazel<sup>8</sup>, Roderick Lawrence<sup>6</sup>, Regina  
17 Grazuleviciene<sup>5</sup>.  
18  
19

20  
21  
22 <sup>1</sup> Centre for Research in Environmental Epidemiology (CREAL), Barcelona,  
23

24 <sup>2</sup> CIBER Epidemiología y Salud Pública (CIBERESP), Madrid, Spain

25 <sup>3</sup> RIVM, Bilthoven, Netherlands

26 <sup>4</sup> CSHER, Stoke-on-Trent, United Kingdom

27 <sup>5</sup> Vytauto Didziojo Universitetas, Kaunas, Lithuania

28 <sup>6</sup> University of Geneva, Geneva, Switzerland

29 <sup>7</sup> VUMC, Amsterdam, Netherlands

30 <sup>8</sup> VGGM, Arnhem, Netherlands

31 <sup>9</sup> UCB, University of California Berkeley, United States

32 <sup>10</sup> Bradford Hospital Trust

33 <sup>11</sup> Universitat Pompeu Fabra (UPF)

34 <sup>12</sup> IMIM (Hospital del Mar Medical Research Institute)  
35  
36

37 Project management and contact: Diana van Gent (CREAL); [dvangent@creal.cat](mailto:dvangent@creal.cat)  
38  
39  
40

41 Mark J Nieuwenhuijsen PhD

42 Research Professor in Environmental Epidemiology

43 Center for Research in Environmental Epidemiology (CREAL)

44 Parc de Recerca Biomèdica de Barcelona - PRBB (office 183.05) C. Doctor Aiguader,

45 88, 08003 Barcelona, SPAIN

46 Tel.: direct (++34) 93 2147337

47 Assistant: Mar Ferrer: (++34) 93 2147330

48 [mferrer1@creal.cat](mailto:mferrer1@creal.cat)

49 FAX: (++34) 93 2147302

50 Email: [mnieuwenhuijsen@creal.cat](mailto:mnieuwenhuijsen@creal.cat)

51 Webpages: <http://www.creal.cat/>

52 [www.phenotype.eu](http://www.phenotype.eu)  
53  
54  
55  
56  
57  
58  
59  
60

## Abstract

**Introduction:** Growing evidence suggests that close contact with nature brings benefits to human health and well-being, but the proposed mechanisms are still not well understood and the associations with health remain uncertain. The **Positive Health Effects of the Natural Outdoor environment in Typical Populations** in different regions in Europe (PHENOTYPE) project investigates the interconnections between natural outdoor environments and better human health and well-being..

**Aims and methods:** The PHENOTYPE project explores the proposed underlying mechanisms at work (stress reduction/restorative function, physical activity, social interaction, exposure to environmental hazards) and examines the associations with health outcomes for different population groups. It implements conventional and new innovative high tech methods to characterize the natural environment in terms of quality and quantity. Preventive as well as therapeutic effects of contact with the natural environment are being covered. PHENOTYPE further addresses implications for land-use planning and green space management.

The main innovative part of the study is the evaluation of possible short and long term associations of green space and health and the possible underlying mechanisms in 4 different countries (with quite different type of green space and use of green space) using the same methods and methodology in one research program. This type of holistic approach has not been undertaken before. Furthermore there are technological innovations such as the use of remote sensing and smartphones in the assessment of green space.

**Conclusion:** The project will produce a more robust evidence base on links between exposure to natural outdoor environment and human health and well-being, in addition to a better integration of human health needs into land use planning and green space management in rural as well as urban areas.

1  
2  
3 **Keywords:** green space, blue space, health, well being, physical activity, social  
4 contacts, restoration, stress, air pollution, remote sensing, GIS, audit, questionnaire  
5 survey, smartphones  
6  
7  
8  
9  
10  
11  
12  
13  
14  
15  
16  
17  
18  
19  
20  
21  
22  
23  
24  
25  
26  
27  
28  
29  
30  
31  
32  
33  
34  
35  
36  
37  
38  
39  
40  
41  
42  
43  
44  
45  
46  
47  
48  
49  
50  
51  
52  
53  
54  
55  
56  
57  
58  
59  
60

For peer review only

## Article summary

### Strengths

The PHENOTYPE project is the largest European project on green space and health

The PHENOTYPE project examines simultaneously the possible underlying mechanisms (stress reduction/restorative function, physical activity, social interaction, exposure to environmental hazards) for the relationship between green space and health in 4 different countries in Europe

The PHENOTYPE project examines a range of possible associations of the natural outdoor environment and health using 16 different cohorts and/registries in 4 different European countries

The PHENOTYPE project uses a range of novel tools and methods to assess access and use of green space including remote sensing, smartphones, audits and interviews.

The PHENOTYPE project works closely with stakeholders and produces new information for stakeholders.

## Introduction

Positive health effects have been observed between green space and mortality longevity[1-3], cardiovascular disease[4], people's self reported general health[5,6], mental health[7-11], sleep patterns[12], recovery from illness[13], social health aspects[14-18] and birth outcomes[19-21]. Some of the associations were shown to be modified by social economic status and level of urbanity, with greater benefits for populations with lower socioeconomic class[20,22] and those in more urban areas[6,22]. Furthermore gender has been shown to modify the relationship[11].

Increased physical activity and social contacts, psychological restoration/stress reduction, and a reduction in pollutants such as noise and air pollution, and temperature have been proposed as possible mechanisms for the health benefits of green space. Access to and/or use of green space has been associated with higher levels of physical activity[23-33] and lower levels of obesity within communities[25,27,34-38]. Studies even suggested that 'green exercise' can have even more positive mental health benefits than other kinds of exercise[39-42].

Psychological restoration[43-45] and reduced stress and anxiety[7,8,17,46,47] have all been associated with access to and/or use of green and natural space. An inner city study in a deprived estate in Chicago showed the benefits of green space both to cognitive restoration[48,49], self-discipline[48], reduced aggression[49] and reduced crime[50], with the latter also observed elsewhere recently[51]

Furthermore a few studies have suggested that green space is associated with more social contacts and cohesion[16,17,52]. And finally reduction of personal exposure to air pollution has been observed in areas with more green space[53], while vegetation has been suggested to reduce air pollution levels, and temperature[54-57], with some suggestion that the benefits are greater for socially disadvantaged groups[55]. It has also been suggested that vegetation (trees, plants) and soil may have an impact on the sound level[58-63]. Part of the appeal of green spaces may be related to pleasant acoustic environments. This may have its own, direct beneficial health effect (Health Council of the Netherlands, 2006).

1  
2  
3 While this growing evidence exists that close contact with nature brings benefits to  
4 human health and well-being, the proposed mechanisms are still not well understood  
5 and the associations with health remain uncertain. Furthermore, it is unclear if the  
6 possible mechanisms act in isolation or together, since with some exceptions[18] they  
7 have been studied in isolation. A coherent conceptual framework on the proposed  
8 mechanisms is currently lacking. Also, most of the research has been conducted in the  
9 North West of Europe and USA leaving questions about the generalisability to other  
10 regions. Inconsistency and variation in indicators (eg type, size and quality) for green  
11 space have often made it difficult to compare results from different studies, and a better  
12 characterisation including that of quantity and quality of green and blue spaces is  
13 needed, not only for research but also for policymakers and spatial planners. Studies  
14 have often focused on access to green space without taking into account actual use of  
15 green space. While blue space may also have a positive effect on health, probably in  
16 combination with green space, there are only a few epidemiological studies  
17 investigating this[64-66]  
18  
19  
20  
21  
22  
23  
24  
25  
26  
27  
28

29 PHENOTYPE, a collaborative research project and explores the proposed underlying  
30 mechanisms at work (stress reduction/restorative function, physical activity, social  
31 interaction, exposure to environmental hazards). PHENOTYPE is the first study  
32 designed to examine these mechanisms simultaneously in a large sample (N=4000  
33 subjects) in various European countries using the same methodology. This allows the  
34 study of specific factors while adjusting for others, and thereby strengthening the  
35 interpretation of the results. It further examines both the long term and short term  
36 associations with health (eg general health and wellbeing, mental health/neural  
37 development, stress, cardiovascular, cancer and respiratory mortality and morbidity,  
38 birth outcomes and obesity) for different population groups (e.g. pregnant women  
39 and/or foetus, different age groups, socioeconomic status, ethnic groups, and patients),  
40 through analyses of existing cohort studies, observational studies and experiments.  
41 Preventive as well as therapeutic effects of contact with the natural environment are  
42 being evaluated. A coherent conceptual framework on the association between the  
43 natural environment and its effects on health and well-being is being developed, and it  
44 addresses implications for land-use planning and green space management.  
45  
46  
47  
48  
49  
50  
51  
52  
53  
54  
55  
56  
57  
58  
59  
60

1  
2  
3 The study includes both rural and urban settings, but the main focus is on the urban  
4 environment, for a number of reasons. Most of the population lives in urban areas  
5 (75%) in Europe, making these of greater relevance to public health, and rapid  
6 urbanization continues to reduce accessible natural environments for urban residents.  
7  
8 Most people make more frequent use of the green spaces in their nearby living  
9 environment instead of travelling greater distances to rural areas, in particular people  
10 with lower socio-economic status, elderly people and children[67,68]. Furthermore,  
11 rural dwellers tend to have constant contact with the natural environment and it may  
12 therefore also be more difficult to assess its effects.  
13  
14  
15  
16  
17  
18

19 Lastly, the project uses an interdisciplinary and integrated approach, applying the best  
20 and most efficient methods to understand the relation between exposure to the natural  
21 environment and health. It implements conventional and innovative high tech methods  
22 to characterize the natural environment in terms of quality and quantity. This paper  
23 provides a general overview of the research methodology of PHENOTYPE.  
24  
25  
26  
27  
28  
29

## 30 31 **Methods**

32  
33  
34 Figure 1 summarizes the different parts of the study and the interdependencies between  
35 the different parts, namely the characterisation of the natural environment and the way it  
36 is used, examination of the underlying mechanisms in daily life settings, short and long  
37 term effects of the natural environment, and the implications for management and  
38 policy of the natural environment (see overview Figures 1 and web figure 1). In this  
39 section we will elaborate on each of these parts. A summary of the mechanisms,  
40 outcomes, populations and areas selected for investigation are given in Table 1.  
41  
42  
43  
44  
45  
46  
47  
48  
49

### 50 ***Characterising the natural environment and the way it is used.***

51  
52  
53 The research includes evaluation of the natural environment, which includes for the  
54 purposes of the project:

55  
56 - Green spaces (e.g. roof gardens, city parks, court yards) and “greenery”; forests, nature  
57 reserves/parks, mountains, farmland, trees, landscaping  
58  
59  
60

1  
2  
3 - Blue spaces; water such as canals, ponds, creeks, rivers, beaches etc.

4 Although many of these may actually not be "natural" since they have been man-made,  
5  
6 for the purpose of the project we classify them as such.  
7

8  
9  
10 One of the main aims of PHENOTYPE is to examine the importance of both  
11 quantitative (e.g. amount, type, access, use) and qualitative characteristics (e.g. acoustic  
12 quality, identity, variety, safety, rubbish) of the natural environment by collecting  
13 detailed data on these characteristics using a combination of methods. The focus lies on  
14 natural environments at different scales and distances from the home (city/town,  
15 neighbourhood, street level) and where possible also at other places where people stay  
16 (work, school, on their way to home/school, recreational). In addition, actual use of the  
17 natural environment is taken into consideration. To achieve the aim, a detailed  
18 assessment will be conducted in 4 case cities (Barcelona, Spain; Doetinchem, the  
19 Netherlands; Kaunas, Lithuania; and Stoke-on-Trent, United Kingdom), with less  
20 detailed assessment in other study areas.  
21  
22  
23  
24  
25  
26  
27  
28

29  
30 PHENOTYPE uses conventional land use maps, remote sensing data from satellites and  
31 aerial photography, complemented by detailed discussions with volunteers and other  
32 stakeholder living and working in the studied areas to derive comparable classifications  
33 of the natural environment in different countries. Collected data will contribute to the  
34 characterisation of the natural environment (both quantitative and qualitative e.g.  
35 accessibility, acoustical quality, recreational activities, walkability etc). For the  
36 quantitative characterisation, PHENOTYPE makes use of available land use maps such  
37 as COordination and INformation on the Environmental programme, initiated by the  
38 European Commission (CORINE)[69] and Urban Atlas[70], and remote sensing and  
39 aerial photography to obtain comparable indices such as NDVI[71] of the natural  
40 outdoor environment in different countries. Landsat Enhanced Thematic Mapper Plus  
41 (ETM+) data are applied to a classification and regression tree (CART) model to  
42 categorise land cover types for the urban areas of interest[55]. Early application of the  
43 NDVI in Barcelona, Spain showed good results[20] (Web Figure 2)  
44  
45  
46  
47  
48  
49  
50  
51  
52

53  
54 To collect additional qualitative information on the natural environment and on other  
55 physical and social features, systematic observations (audits) are conducted by trained  
56 researchers in selected neighbourhoods in the 4 case cities using the same methods.  
57  
58  
59  
60



1  
2  
3 Since it is not feasible and not necessary to audit every street in a selected  
4 neighbourhood, a purposeful sample of streets is drawn, ensuring that important  
5 neighbourhood features are included. The selected neighbourhoods are divided into  
6 more or less homogeneous sub-areas by means of data/maps on land use/function of  
7 areas in combination with local knowledge of the area. Subsequently, trained auditors  
8 are asked to visit the sub-areas and observe them in a systematic way (auditing) using a  
9 paper form containing several close-ended questions. Every sub-area is visited by two  
10 auditors. For the first 1-2 areas, the auditors fill in the list together, discussing  
11 completion to reach consensus. In subsequent areas, where possible, the two auditors  
12 complete the audit independently and simultaneously. Furthermore, up to two natural  
13 environments of more than one hectare in size are selected per neighbourhood using  
14 GIS. Again following training in completion of the audit, two auditors visit the  
15 environments. For the first five areas, auditors undertake the interview together,  
16 discussing completion to reach consensus, thus maximizing consistency. In subsequent  
17 areas, where possible, two assessors complete the audit independently and  
18 simultaneously. In the absence of existing measures that could meet our requirements,  
19 the streetscape audit was developed for this project and the natural environment tool  
20 was adapted from an existing measures. This kind of bespoke tool development is seen  
21 in similar studies e.g. by Van Dillen[72]. One form is used for evaluating the  
22 streetscape, using indicators derived from the Street Typology developed by  
23 Leijdelmeijer et al. (2002)[73], a list of evaluating the quality of green by Van Dillen  
24 (2012)[72] and the audit tool developed by Van Lenthe et al. (2006)[74]. The natural  
25 environment audit is adapted from that developed by Gidlow et al (2012)[75] through  
26 addition of items and domains to reflect the greater diversity in natural environments to  
27 be included (i.e., different types of natural environment across four European cities).  
28 The tools were piloted and adjusted prior to use. They have not been 'validated', but  
29 there is no gold standard quality measure for natural environments against which to  
30 compare. Inter-rater reliability will be estimated through derivation of Inter-rater  
31 Correlation Coefficients (ICC) and PCA will be used to ensure that any redundant items  
32 are removed and included items are grouped sensibly into domains, before overall  
33 quality scores will be derived.

34  
35  
36  
37  
38  
39  
40  
41  
42  
43  
44  
45  
46  
47  
48  
49  
50  
51  
52  
53  
54  
55  
56 To gain insight into the way people use the natural environment, a face to face  
57 questionnaire survey is conducted to collect data on 1000 people in the 30 selected  
58  
59  
60

1  
2  
3 neighbourhoods in each of the 4 case cities, and an in-depth study using “Calfit”, a  
4 smartphone-based monitor of time-location patterns and momentary states, on a  
5 subsample (n=100) of the participants of the questionnaire survey (for further detailed  
6 information, see next section on underlying mechanisms). The Calfit software[76,77]  
7 runs on a Google Android operating system and as currently configured can collect data  
8 on physical activity using the motion sensor and geographic location through a global  
9 positioning system (GPS), to obtain information on minutes spent and physical activity  
10 levels in different natural environments (Web Figure 3). The instrument has been  
11 validated against the Actigraph accelerometer[76], combined with other pollution  
12 measurements to assess likely inhalation[77], and lab-validated using the Cosmed  
13 metabolic monitoring system.  
14  
15  
16  
17  
18  
19  
20  
21

22  
23 The work will produce different indicators of natural space that can be used in the  
24 studies described below. The aim is to make a hierarchy of indicators with on the  
25 bottom simple measures such as NDVI that can be easily obtained for all the study areas  
26 and on the top detailed measures of for example green space with actually information  
27 on the quantity, quality and use that can only be obtained for only some areas after in-  
28 depth study. As part of the work, we will examine the relationship between the simple  
29 and detailed measures to better understand how detailed information on small scale can  
30 help the interpretation of health studies conducted in larger areas with only simple  
31 measures available using existing epidemiological studies and registries (see below).  
32  
33  
34  
35  
36  
37  
38  
39

### 40 ***Examining the underlying mechanism in the daily life setting***

41  
42  
43 New data will be collected to explore in detail and simultaneously the proposed  
44 mechanisms (physical activity, social contacts/cohesion, psychological restoration/stress  
45 reduction) underlying the relationship between the natural environment and health and  
46 well-being, in the four case cities. In each of these cities neighbourhoods varying in  
47 socio-economic status and in their distance to green space are selected. In these  
48 neighbourhoods the natural environment will be characterised, and (as mentioned above  
49 already) a selection of 1000 randomly selected residents (4000 in total, 18-75 years)  
50 will participate in a questionnaire survey, 100 in a smartphone study, and 20 in in-depth  
51 interviews (Web Figure 4).  
52  
53  
54  
55  
56  
57  
58  
59  
60

1  
2  
3 To optimally investigate what types of natural environments and different levels of  
4 accessibility are relevant in relation with the mechanisms that we investigate (physical  
5 activity, stress and restoration, social interactions and environmental pollution), and to  
6 investigate potential differences in this mechanism among the population, we use a  
7 multiple level approach and select neighbourhoods with different socio-economic status  
8 (SES) and access to the natural environment. We use existing statistical or  
9 administrative units with Existing statistical or administrative units that were as similar  
10 as possible with regard to variation in population size; in Stoke-on-Trent Lower Layer  
11 Super Output Areas (LSOAs), in Barcelona census areas, in Kaunas voting districts and  
12 in Doetinchem neighborhoods. Natural space and SES measures are assigned to all the  
13 units, using existing data. For natural space, Urban Atlas is used for Stoke-on-Trent,  
14 Barcelona and Kaunas. Since Urban Atlas is not available for Doetinchem, data of  
15 another Dutch database ('Top10 nl') is used. For SES no comparable data existed for  
16 the 4 cities. Therefore partners use their own local data. Then the units are ranked by  
17 each natural space and SES. Subsequently a selection of two neighbourhoods from each  
18 combination of top, middle and bottom tertiles of SES and quintiles of the natural space  
19 is made (approx.  $2 \times 3 \times 5 = 30$  units). A few extra units are added to optimize contrast  
20 and reach a sufficient number of units to be able to recruit a 1000 subjects in each city  
21 (30 subjects per units). Since there are no common person registries in these countries,  
22 subjects (aged between 18 and 75) are selected using different approaches. In  
23 Doetinchem and Stoke-on-Trent, addresses are sampled randomly from the BAG  
24 Registry ('Buildings and Adresses') 2012 and a local address registry respectively and  
25 the person with the closest birthday to the interview data is selected at each address, in  
26 Barcelona subjects are randomly selected from the person registry (empadronamiento)  
27 and in Kaunas subjects are sampled randomly from a 2006-2009 survey of randomly  
28 sampled people of the city of Kaunas. In each case there is an over selection of  
29 potential addresses or subjects to be able to interview at least a 1000 subjects (and 30  
30 per unit) in each city. The target of a 1000 subjects per city was mostly based on the  
31 available budget. To enable multi-level analysis, we estimated that a minimum of 30  
32 participants per group (or neighbourhood) were required, with a minimum of 30 groups.

33  
34  
35  
36  
37  
38  
39  
40  
41  
42  
43  
44  
45  
46  
47  
48  
49  
50  
51  
52  
53  
54  
55  
56  
57  
58  
59  
60  
The questionnaire survey was designed to investigate three potential mechanisms in  
relation to natural environments and health: via physical activity, stress and restoration  
and social interactions as described in. In addition questions are included about

1  
2  
3 environmental worries and reactions to perceived exposures (air pollution, noise, etc).  
4 The choice of indicators was based on these three mechanisms and was achieved via an  
5 interactive process of experts within the PHENOTYPE team. As much as possible  
6 questions were derived from existing and validated indices, some tailored to the specific  
7 objectives of PHENOTYPE. The questionnaire was developed in English and was  
8 translated (and back translated) into Dutch, Spanish, Catalan, and Lithuanian. The  
9 questionnaire was developed to be applied in an oral interview of at maximum 60  
10 minutes. In Kaunas it is not common to have face-to-face interviews; therefore a written  
11 questionnaire is sent by post to the selected people. The questionnaire was piloted by all  
12 partners, with specific attention for comprehensibility, clarity and duration and was  
13 adapted at some points based on outcomes of these pilots.  
14  
15  
16  
17  
18  
19  
20  
21

22  
23 The final questionnaire is structured along four main clusters of questions: I. Green and  
24 Blue Spaces; II Residential situation: Dwelling & Neighbourhood; III Wellbeing and  
25 Health; IV Personal characteristics. Per mechanism questions are asked about  
26 availability, use, importance, and satisfaction. In the sequencing of the questions we  
27 strive for a coherent set of questions per cluster moving from general to specific and  
28 from ‘easy’ to more intruding questions. Furthermore, most of the answer categories  
29 moved from neutral negative towards positive items. For all answers showcards have  
30 been developed by RIVM, to make it easier for both interviewers and respondents, and  
31 to speed up the interview process. A separate instruction document was developed to  
32 train the interviewers. The questionnaire ended with an optional a pencil paper attention  
33 test (Color Trails Test (CTT-A)) add ref.  
34  
35  
36  
37  
38  
39  
40  
41

42  
43 Finally for the smartphone study at least 100 volunteers from each country are randomly  
44 selected from the participants of the questionnaire survey who indicated that they were  
45 willing to participate in the smartphone study. For these subjects, during 7 subsequential  
46 days the emotional state of the subject, the local environment (e.g., different quantities  
47 or qualities of natural space) and the social setting are assessed with the smartphone and  
48 the innovative Calfit technology. Besides objective geolocation and physical activity  
49 (see section Characterisation the natural environment), subjective data on stress  
50 reduction/restoration and social contacts are collected simultaneously. The latter data  
51 are collected through interactive diaries capable of eliciting ecological momentary  
52 assessment (EMA). EMA is a novel approach to elicit responses to electronic surveys  
53  
54  
55  
56  
57  
58  
59  
60

1  
2  
3 throughout the course of daily life[78]. The participant receives prompts at random  
4 intervals to complete small surveys on the phone, which then have time and location  
5 stamp.  
6  
7

8  
9 From the people who participate in both the questionnaire survey and the CALFIT study  
10 and who indicate they wanted to volunteer, 80 people (20 in each case city) are  
11 approached for semi structured interviews. These interviews are conducted to gain more  
12 detailed information on specific topics included in the questionnaire survey and  
13 CALFIT/EMA. Topics addressed include the motivation for travel routes, the  
14 associations of natural environment with mood, behaviour and well-being, the attitude  
15 towards and importance of (experiences with) natural environment, and reasons for  
16 using or not using the natural environment.  
17  
18  
19  
20  
21  
22

### 23 24 *Epidemiological studies to examine long term effects of the natural environment* 25

26  
27 By using existing epidemiological studies and registries and linking these to the natural  
28 space indicators described earlier, the association between natural environment and a  
29 range of different long term health outcomes will be examined in an efficient and cost  
30 effective manner. PHENOTYPE makes use of 16 existing cohorts and registries with  
31 good health outcome data in Spain, the Netherland, Lithuania, and United Kingdom  
32 (Web Table 1), linking these to newly created natural environment indicators.  
33 Comparable estimates are produced for various regions in Europe for the associations  
34 with pregnancy outcomes, foetus development, children's health and adult population  
35 morbidity and mortality. We specifically focus on:  
36  
37  
38  
39  
40  
41  
42

- 43 • the natural outdoor environment and ethnicity, socio-economic status, women's  
44 health and pregnancy outcomes;
- 45 • the natural outdoor environment and foetus development, birth weight, and  
46 gestational age;
- 47 • the natural outdoor environment and general development, neurodevelopment,  
48 cognitive function and respiratory health in children;
- 49 • the natural outdoor environment and respiratory health in various European cities;
- 50 • the natural outdoor environment and general health, physical activity, specific  
51 morbidity and mortality.  
52  
53  
54  
55  
56  
57  
58  
59  
60

1  
2  
3  
4 The assessment of natural environment indicators will be mainly based on satellite data  
5 and land use maps as CORINE and Urban atlas, and sometimes local data. This will  
6 restrict to some extent the evaluation of the association with the natural environment,  
7 but this is the only realistic and achievable approach. All studies examine the role of  
8 socio-economic status, which has been suggested as an effect modifier for the  
9 relationship between exposure to the natural environment and health benefits. The  
10 European Community Respiratory Health study (ECRHS)[79] further allows for  
11 examination of exposure to the natural outdoor environment and associations with  
12 health in a range of different European cities. Some cohorts such as the Born in  
13 Bradford study[80] offers a unique opportunity to investigate the role of ethnicity in the  
14 relationship between exposure to the natural outdoor environment and health benefits,  
15 in Bradford study half of the participants are from Pakistani background, with  
16 information on both the mother and baby from pregnancy to early years in life.  
17  
18  
19  
20  
21  
22  
23  
24  
25  
26  
27

### 28 *Experiments to examine short term effects of the natural environment*

29  
30  
31 To examine short term effects of the natural environment on health and well-being, one  
32 or more experimental studies are conducted in each country in which individuals are  
33 exposed to different types of natural and urban environments (i.e., environmental  
34 conditions). The majority of data collection is field-based to maximise the ecological (as  
35 well as internal) validity of any observed effects.  
36  
37  
38

39 Using a range of psychological and physiological indicators relevant to the various  
40 possible mechanisms, and 2) healthy and patient population groups (with mental and/or  
41 somatic morbidities) we will collectively explore::  
42  
43

- 44 - preventive and therapeutic effects of natural environments.
- 45 - immediate and sustained changes in affective, cognitive and physiological  
46 responses indicative of well-being while engaged in a natural environment, and  
47 after leaving a natural environment
- 48 - neurobiological responses to viewing natural or urban scenes before/after  
49 experiencing stress.  
50  
51  
52  
53  
54  
55

56 Through variation in experimental design, each partner makes a novel contribution(s) to  
57 the area as (details in Web Table 2):  
58  
59  
60

- UK: In healthy individuals, Study 1 compares immediate and post-exposure psychophysiological effects of urban versus natural environments to explore whether any beneficial effects are sustained following single exposures; Study 2 uses longer-term follow-up and repeated exposure to natural environments to explore whether any effects are accumulated, sustained or attenuated.
- Netherlands: an experimental functional Magnetic Resonance Imaging (fMRI) study is conducted in healthy individuals to investigate neurobiological responses to viewing natural or urban scenes before/after experiencing stress; i.e., whether viewing natural compared to urban scenery can prevent or buffer against stress responses, and how this is represented in brain activation patterns.
- Spain: in individuals with elevated stress levels, group-based exposure and Ecological Momentary Assessment (EMA, using CALFIT technology) are used to explore the role of social interaction and the nature of physical activity, in immediate and longer term responses. Ecological validity will be enhanced through ‘free-living’ activities within environments, rather than controlling activities, again, using EMA, GPS and accelerometry to monitor the nature (and perceptions) of this activity.
- Lithuania: a clinical population with established coronary artery disease (CAD) are recruited to evaluate the therapeutic effect of the natural environment. The outcomes of this experiment may have direct clinical applications for the use of urban and different types of natural environment in cardiac rehabilitation.

### ***Implications, policy and guidelines and involvement of stakeholders***

#### *Guidelines*

PHENOTYPE will provide recommendations for policymakers and guidelines for professional practitioners involved with spatial planning and health to create natural environments that promote health and well being. For this, we focus on a human ecological perspective which allows for a better integration of human health needs into land use planning and green space management in both rural and urban areas[81].

Currently legal standards that have been developed with economic, technological and

1  
2  
3 political priorities in mind, are leading in urban design, whereas the lifestyle, sense of  
4 community, identity, and health and well being of local populations have been largely  
5 undervalued. The guidelines will reflect the importance to consider environmental,  
6 social, economic and other components of the natural and built environments in ways  
7 that also take into account and result from the point of view of citizens. PHENOTYPE  
8 will complement the common quantitative approach by valorising the social/human  
9 functions of these environments, especially their contribution to promoting health and  
10 quality of life.  
11  
12  
13  
14  
15  
16

17  
18 Following this broad and innovative approach, PHENOTYPE will formulate, test and  
19 validate a set of recommendations and guidelines concerning the desired characteristics  
20 of different types of natural environments in urban and rural areas, specifically their  
21 characteristic features, accessibility to them for different population groups, as well as  
22 their facilities, maintenance and services. By doing so, the work will overcome the  
23 existing applicability gap between information and knowledge accumulated by much  
24 research and policy definition and implementation.  
25  
26  
27  
28  
29

30  
31 The guidelines for professional practitioners involved with spatial planning and health  
32 will consider three core topics in relation to each of the natural environment being  
33 considered:  
34  
35

- 36 1. Qualitative characteristics of natural environments; recommendations concerning  
37 surface area, vegetation, water sources, ambient noise levels, views and  
38 microclimate;
- 39 2. Facilities, Maintenance and Services; recommendations about the kinds of  
40 communal facilities and services provided in each type of natural environment, as  
41 well as suggested levels of maintenance;
- 42 3. Accessibility Guidelines to Natural Environments; including requirements about  
43 access to different types of natural environments such as allotments,  
44 neighbourhood parks, children's playgrounds and nature reserves.  
45  
46  
47  
48  
49  
50

51 The baseline for the work is firstly the compilation and analysis of currently available  
52 information from existing databases and literature, and later new data collected by the  
53 project as described above. This will be complemented by the engagement with the  
54 appropriate stakeholders to assess scope for development. These insights will be  
55  
56  
57  
58  
59  
60



1  
2  
3 combined into a conceptual framework on the underlying mechanisms of the effects of  
4 the natural environment on health and well-being.  
5  
6

### 7 *Stakeholders and dissemination*

8  
9  
10  
11 The participation provides a forum for project assurance and benefits for PHENOTYPE  
12 are summarised as follows:  
13

- 14  
15  
16 - A more robust evidence base on links between exposure to natural outdoor  
17 environment and human health/well-being for various regions in Europe. Hereby  
18 we expect to develop a better understanding of the potential mechanisms.  
19
- 20  
21 - A better integration of human needs into land use planning and green space  
22 management in rural as well as urban areas. Furthermore, the application of  
23 these needs in practical guidelines.  
24  
25  
26

27  
28 Stakeholder involvement is critical for bringing outside (policy) ideas into the research  
29 planning, to increase the usefulness of the research, and to assure a better  
30 implementation of the results of the project (Web Figure 5). In a research project, this is  
31 often limited because the lack of interest of stakeholders and the limited resources and  
32 efforts of consortia.  
33  
34  
35

36  
37  
38 From the start of PHENOTYPE actively sought to establish and maintain relations and  
39 dialogues with and between key stakeholders from local, regional and national health  
40 and environment authorities, institutions and the international research community.  
41 These include policy makers, architects, urban planners, natural space managers, health  
42 professionals, and the international research community. This group is highly diverse,  
43 as we are looking at a range of professions within the subject areas of environment and  
44 health, from volunteers to scientists, community workers and policy developers.  
45 PHENOTYPE has thus far been successful in its engagement activities, providing  
46 continuous opportunities for information exchange and collaborations. These contribute  
47 to strengthening networking between researchers, policy-makers and stakeholders in  
48 order to facilitate the transfer of scientific knowledge to policy development, to  
49 exchange ideas about best practice and to help identify emerging issues on the natural  
50 outdoor environment and its mechanisms to improve health.  
51  
52  
53  
54  
55  
56  
57  
58  
59  
60

1  
2  
3  
4 The PHENOTYPE website [www.phenotype.eu](http://www.phenotype.eu) provides an overview of the project,  
5 progress, actualities, surveys and publications. The site has a sign up form for periodic  
6 newsletters through which all stakeholders are regularly informed. It guarantees  
7 continuous visibility, and provides a means for interested parties to respond to activities,  
8 or to contact us with invitations to attend workshops, etc. PHENOTYPE is also found  
9 on social media twitter (@greenhealth4eu) and LinkedIn. The PHENOTYPE databases  
10 and overall results will be exploitable by policy makers at national and international  
11 level in areas including urban planning and health.  
12  
13  
14  
15  
16  
17  
18  
19  
20

## 21 **Conclusion**

22  
23  
24 The PHENOTYPE project is an FP7 collaborative action, funded by the EC to explore  
25 the mechanisms underlying positive short term and long term health effects for different  
26 population groups. PHENOTYPE applies conventional and new innovative high tech  
27 methods to characterize the natural environment in terms of quality and quantity.  
28 Preventive as well as therapeutic effects of contact with the natural environment will be  
29 covered. The proposed work aims to address the limitations of some of the studies that  
30 have been published so far (Table 2). Furthermore it addresses implications for land-  
31 use planning and green space management. The project will produce a more robust  
32 evidence base on links between exposure to natural outdoor environment and human  
33 health and well-being. This in turn will contribute to improved integration of human  
34 health needs into land use planning and green space management in rural and urban  
35 areas.  
36  
37  
38  
39  
40  
41  
42  
43  
44  
45  
46  
47  
48  
49  
50  
51  
52  
53  
54  
55  
56  
57  
58  
59  
60

## Acknowledgement

This research is receiving funding from the European Community's Seventh Framework Programme (FP7/2007-2013) under grant agreement no: 282996

[ENV.2011.1.2.3-2] Positive effects of natural environment for human health and well-being] Duration 1 Jan 2012-31 Dec 2015

Ethics approval was obtained for all aspects of the study by the local ethics committees in the countries where the work was conducted, and sent to the European Commission before advancement of the study.

## Author statement

Mark J Nieuwenhuijsen, Hanneke Kruize, Christopher Gidlow, Michael Jerrett, Jolanda Maas, Edmund Seto, Peter Jan van den Hazel, Roderick Lawrence, and Regina Grazuleviciene and wrote the original grant proposal on which the study design and paper is based. Mark J Nieuwenhuijsen drafted the version of the paper and received input from all the authors. All authors read and commented on the paper and agree with the final version.

## Competing Interests

None

## Data Sharing Statement

"No additional data available yet"

1  
2  
3  
4  
5 "No additional data available yet".  
6  
7  
8  
9  
10  
11  
12  
13  
14  
15  
16  
17  
18  
19  
20  
21  
22  
23  
24  
25  
26  
27  
28  
29  
30  
31  
32  
33  
34  
35  
36  
37  
38  
39  
40  
41

## References

42 (1) Takano, T., Nakamura, K., & Watanabe, M. (2002). Urban residential environments  
43 and senior citizens' longevity in megacity areas: The importance of walkable green  
44 spaces. *Journal of Epidemiological Community Health*, 56, 913–918.  
45  
46  
47

48  
49 (2) Mitchell, R., & Popham, F. (2008). Effect of exposure to natural environment on  
50 health inequalities: An observational population study. *The Lancet*, 372(9650), 1655–  
51 1660.  
52  
53  
54

55  
56 (3) Villeneuve PJ, Jerrett M, Su JG, et al. A cohort study relating urban green space  
57 with mortality in Ontario, Canada. *Environ Res*. 2012 May;115:51-8  
58  
59  
60

1  
2  
3  
4 (4) Pereira G, Foster S, Martin K, et al. The association between neighborhood  
5 greenness and cardiovascular disease: an observational study. *BMC Public Health* 2012,  
6 12:466  
7  
8

9  
10  
11 (5) de Vries, S., Verheij, R. A., Groenewegen, P. P., et al. (2003). Natural environments  
12 – healthy environments? An exploratory analysis of the relationship between greenspace  
13 and health. *Environment and Planning A*, 35, 1717–1731.  
14  
15

16  
17  
18 (6) Maas, J., Verheij, R. A., Groenewegen, P. P., et al. (2006). Green space, urbanity  
19 and health: How strong is the relation? *Journal of Epidemiology and Community Health*,  
20 60, 587–592.  
21  
22

23  
24 (7) Grahn, P., & Stigsdotter, U. A. (2003). Landscape planning and stress. *Urban*  
25 *Forestry & Urban Greening*, 2(1), 1–18.  
26  
27

28  
29 (8) Hartig, T., Evans, G. W., Jamner, L. D., et al. (2003). Tracking restoration in natural  
30 and urban field settings. *Journal of Environmental Psychology*, 23, 109–123.  
31  
32

33  
34 (9) Maas, J., Verheij, R. A., de Vries, S., et al. Morbidity is related to a green living  
35 environment. *Journal of*  
36 *Epidemiology and Community Health*, 63, 967–973.  
37  
38

39  
40 (10) Ottosson, J., & Grahn, P. (2005). A comparison of leisure time spent in a garden  
41 with leisure time spent indoors: On measures of restoration in residents in geriatric care.  
42 *Landscape Research*, 30(1), 23–55.  
43  
44  
45

46  
47 (11) Richardson, E. A., & Mitchell, R. (2010b). Gender differences in relationships  
48 between urban green space and health in the United Kingdom. *Social Science and*  
49 *Medicine*, 71(3), 568–575.  
50  
51  
52

53  
54 (12) Astell-Burt T, Feng X, Kolt GS. Does access to neighbourhood green space  
55 promote a healthy duration of sleep? Novel findings from a cross-sectional study of 259  
56  
57  
58  
59  
60

1  
2  
3 319 Australians. *BMJ Open*. 2013a Aug 13;3(8). pii: e003094. doi: 10.1136/bmjopen-  
4 2013-003094.  
5  
6

7  
8 (13) Ulrich RS. Views through a Windows may influence recovery from surgery.  
9 *Science*. 1984 Apr 27;224(4647):420-1.  
10

11  
12 (14) Kim, J., & Kaplan, R. (2004). Physical and psychological factors in sense of  
13 community – New urbanist Kentlands and nearby orchard village. *Environment*  
14 *Behavior*, 36, 313–334.  
15  
16

17  
18 (15) Sullivan, W. C., Kuo, F. E., & Depooter, S. F. (2004). The fruit of urban nature:  
19 Vital neighbourhood spaces. *Environment and Behavior*, 36, 678–700.  
20  
21

22  
23 (16) Kweon, B. S., Sullivan, W. C., & Wiley, A. (1998). Green common spaces and the  
24 social integration of inner-city older adults. *Environment and Behavior*, 30, 832–858.  
25  
26

27  
28 (17) Maas, J., van Dillen, S. M. E., Verheij, R. A., et al. (2009a). Social contacts as a  
29 possible mechanism behind the relation between green space and health. *Health and*  
30 *Place*, 15(2), 586–595.  
31  
32

33  
34 (18) de Vries S, van Dillen SME, Groenewegen PP, et al. Streetscape greenery and  
35 health: Stress, social cohesion and physical activity as mediators. *Social Science &*  
36 *Medicine* 94 (2013) 26e33  
37  
38

39  
40 (19) Donovan GH, Michael YL, Butry DT, et al. Urban trees and the risk of poor birth  
41 outcomes. *Health & Place* 17 (2011) 390–393  
42  
43

44  
45 (20) Dadvand P, de Nazelle A, Figueras F, et al. 2012a. Green space, health inequality  
46 and pregnancy. *Environ Int* 40:110-115.  
47  
48

49  
50 (21) Dadvand P, Sunyer J, Basagaña X, et al. 2012b. Surrounding Greenness and  
51 Pregnancy Outcomes in Four Spanish Birth Cohorts. *Environmental health perspectives*  
52 120(10):1481-1487.  
53  
54  
55  
56  
57  
58  
59  
60

1  
2  
3 (22) Mitchell, R., & Popham, F. (2007). Greenspace, urbanity and health: Relationships  
4 in England. *Journal of Epidemiology and Community Health*, 61, 681–683.  
5  
6

7  
8 (23) Cohen DA, Ashwood JS, Scott MM, et al. Public parks and physical activity  
9 among adolescent girls. *Pediatrics* 2006 Nov;118(5):e1381-9  
10  
11

12  
13 (24) Cohen, D.A., McKenzie, T.L., Sehgal, A., et al. & Lurie, N. (2007). Contribution  
14 of public parks to physical activity. *American Journal of Public Health*, 97:509-14.  
15  
16

17  
18 (25) Coombes, E., Jones, A. P., & Hillsdon, M. (2010). The relationship of physical  
19 activity and overweight to objectively measured green space accessibility and use.  
20 *Social Science & Medicine*, 70(6), 816–822.  
21  
22

23  
24 (26) Lachowycz, K., & Jones, A. P. (2011). Greenspace and obesity: a systematic  
25 review of the evidence. *Obesity Reviews*, 12(5), e183-e189. doi: 10.1111/j.1467-  
26 789X.2010.00827.x  
27  
28

29  
30  
31 (27) Toftager M, Ekholm O, Schipperijn J, et al. Distance to green space and physical  
32 activity: a Danish national representative survey. *J Phys Act Health*. 2011  
33 Aug;8(6):741-9.  
34  
35

36  
37  
38 (28) Rodríguez DA, Cho GH, Evenson KR, et al. Out and about: association of the built  
39 environment with physical activity behaviors of adolescent females. *Health Place*. 2012  
40 Jan;18(1):55-62.  
41  
42

43  
44 (29) Mytton OT, Townsend N, Rutter H, et al. Green space and physical activity: an  
45 observational study using Health Survey for England data. *Health Place*. 2012  
46 Sep;18(5):1034-41. doi: 10.1016/j.healthplace.2012.06.003. Epub 2012 Jun 17.  
47  
48

49  
50  
51 (30) Annerstedt M, Ostergren PO, Björk J, et al. Green qualities in the neighbourhood  
52 and mental health - results from a longitudinal cohort study in Southern Sweden. *BMC*  
53 *Public Health*. 2012 May 8;12:337. doi: 10.1186/1471-2458-12-337.  
54  
55  
56  
57  
58  
59  
60

- 1  
2  
3 (31) Almanza E, Jerrett M, Dunton G, et al. A study of community design, greenness,  
4 and physical activity in children using satellite, GPS and accelerometer data. *Health*  
5 *Place*. 2012 Jan;18(1):46-54.  
6  
7  
8  
9  
10 (32) Astell-Burt T, Feng X, Kolt GS. Green space is associated with walking and  
11 moderate-to-vigorous physical activity (MVPA) in middle-to-older-aged adults:  
12 findings from 203 883 Australians in the 45 and Up Study. *Br J Sports Med*. 2013b Apr  
13 30. [Epub ahead of print]  
14  
15  
16  
17  
18 (33) Richardson EA, Pearce J, Mitchell R, et al. Role of physical activity in the  
19 relationship between urban green space and health. *Public Health*. 2013  
20 Apr;127(4):318-24. doi: 10.1016/j.puhe.2013.01.004. Epub 2013 Apr 12.  
21  
22  
23  
24 (34) Ellaway E, Macintyre S, Bonnefoy X. Graffiti, greenery, and obesity in adults:  
25 secondary analysis of European cross sectional survey. *BMJ* 2005 17;331(7517):611-2  
26  
27  
28  
29  
30 (35) Wolch J, Jerrett M, Reynolds K, et al. Childhood obesity and proximity to urban  
31 parks and recreational resources: A longitudinal cohort study. *Health & Place* 17 (2011)  
32 207–214  
33  
34  
35  
36 (36) Pereira G, Christian H, Foster S, et al. The association between neighborhood  
37 greenness and weight status: An observational study in Perth Western Australia  
38 *Environmental Health* 2013, 12:49 (19 June 2013)  
39  
40  
41  
42  
43 (37) Astell-Burt T, Feng X, Kolt GS. Greener neighborhoods, slimmer people?  
44 Evidence from 246 920 Australians. *Int J Obes (Lond)*. 2013c May 3. doi:  
45 10.1038/ijo.2013.64. [Epub ahead of print]  
46  
47  
48  
49 (38) Lovasi GS, Schwartz-Soicher O, Quinn JW, et al. Neighborhood safety  
50 and green space as predictors of obesity among preschool children from low-income  
51 families in New York City. *Prev Med*. 2013 May 31. pii: S0091-7435(13)00175-8. doi:  
52 10.1016/j.ypmed.2013.05.012. [Epub ahead of print]  
53  
54  
55  
56  
57  
58  
59  
60



1  
2  
3 (39) Bodin, M. & Hartig, T. (2003). Does the outdoor environment matter for  
4 psychological restoration gained through running? *Psychology of Sport and Exercise*,  
5 4:141-153  
6  
7

8  
9 (40) Pretty, J., Peacock, J., Sellens, M. et al. (2005). The mental and physical health  
10 outcomes of green exercise. *International Journal of Environmental Health Research*,  
11 15(5):319-337.  
12  
13

14  
15 (41) Bowler DE, Buyung-Ali LM, Knight TM, et al. A systematic review of evidence  
16 for the added benefits to health of exposure to natural environments. *BMC Public*  
17 *Health* 2010, 10:456  
18  
19  
20  
21

22  
23 (42) Thompson Coon, J., Boddy, K., Stein, K., et al. (2011). Does Participating in  
24 Physical Activity in Outdoor Natural Environments Have a Greater Effect on Physical  
25 and Mental Wellbeing than Physical Activity Indoors? A Systematic Review.  
26 *Environmental Science & Technology*, 45(5), 1761-1772. doi: 10.1021/es102947t  
27  
28  
29

30  
31 (43) Kaplan, R., & Kaplan, S. (1989). The experience of nature: A psychological  
32 perspective. New York: Cambridge University Press.  
33  
34  
35

36 (44) van den Berg, A. E., Koole, S. L., & van der Wulp, N. Y. (2003). Environmental  
37 preference and restoration: (How) are they related? *Journal of Environmental*  
38 *Psychology*, 23(2), 135–146.  
39  
40  
41

42 (45) van den Berg, A., & Custers, M. H. G. (2011). Gardening promotes neuroendocrine  
43 and affective restoration from stress. *Journal of Health Psychology*, 16(1), 3–11.  
44  
45  
46

47 (46) Ulrich, R. S., Simons, R. F., Losito, B. D., et al. (1991). Stress recovery during  
48 exposure to natural and urban environments. *Journal of*  
49 *Environmental Psychology*, 11, 201–230.  
50  
51  
52

53 (47) Stigsdotter UK, Ekholm O, Schipperijn J, et al. Health promoting outdoor  
54 environments – associations between green  
55  
56  
57  
58  
59  
60

1  
2  
3 space, and health, health-related quality of life and stress based on a Danish national  
4 representative survey. *Scandinavian Journal of Public Health*, 2010; 0: 1–7  
5  
6

7  
8 (48) Faber Taylor, A., Kuo, F. E., & Sullivan, W. (2002). Views of nature and self  
9 discipline: Evidence from inner city children. *Journal of Environmental Psychology*, 22,  
10 49–63.  
11

12  
13  
14 (49) Kuo, F. E., & Sullivan, W. C. (2001a). Aggression and violence in the inner city:  
15 Effects of environment on mental fatigue. *Environment and Behavior*, 33(4), 543–571.  
16  
17

18  
19 (50) Kuo, F. E., & Sullivan, W. C. (2001b). Environment and crime in the inner city:  
20 Effects of environment via mental fatigue. *Environment and Behavior*, 33(3), 343–367.  
21  
22

23  
24 (51) Wolfe MK, Jeremy Mennis J. Does vegetation encourage or suppress urban crime?  
25 Evidence from Philadelphia, PA. *Landscape and Urban Planning* 108 (2012) 112– 122  
26  
27

28  
29 (52) Kuo FE, Sullivan WC, Wiley A. Fertile ground for community: inner-city  
30 neighborhood common spaces. *Am J Community Psychol*, 1998a; 26:823-51  
31  
32

33  
34 (53) Dadvand P, de Nazelle A, Triguero-Mas M, et al. Surrounding Greenness and  
35 Exposure to Air Pollution During Pregnancy: An Analysis of Personal Monitoring Data.  
36 *Environ Health Perspect*. 2012c;120(9):1286-90  
37  
38

39  
40 (54) Baldauf R, Watkins N, Heist D, et al. 2009. Near-road air quality monitoring:  
41 Factors affecting network design and interpretation of data. *Air Qual Atmos Health*  
42 2(1):1-9.  
43  
44

45  
46 (55) Su JG, Jerrett M, de Nazelle A, et al. Does exposure to air pollution in urban parks  
47 have socioeconomic, racial or ethnic gradients? *Environ Res*. 2011 Apr;111(3):319-28.  
48  
49

50  
51 (56) Park M, Hagishima A, Tanimoto J, et al. Effect of urban vegetation on outdoor  
52 thermal environment: Field measurement at a scale model site. *Building and*  
53 *Environment* 56:38-46.  
54  
55  
56  
57  
58  
59  
60

- 1  
2  
3 (57) Park M, Hagishima A, Tanimoto J, et al. 2012b. Effect of urban vegetation on  
4 outdoor thermal environment: Field measurement at a scale model site. *Building and*  
5 *Environment* 56:38-46.  
6  
7  
8  
9  
10 (58) Aylor DE, *Noise reduction by vegetation and ground*. *J Acoust Soc Am*, 1972. **51**:  
11 p. 197-205.  
12  
13  
14 (59) Fan Y, Zhiyi B, Zhujun Z, et al, *The investigation of noise attenuation by plants*  
15 *and the corresponding noise-reducing spectrum*. *J Environ Health*, 2010. **72**: p. 8-15.  
16  
17  
18  
19 (60) Fang CF and Ling DL, *Investigation of the noise reduction provided by tree belts*.  
20 *Landscape Urban Plan*, 2003. **63**: p. 187-195.  
21  
22  
23  
24 (61) Fang CF and Ling DL, *Guidance for noise reduction provided by tree belts*.  
25 *Landscape Urban Plan*, 2005. **71**: p. 29-34.  
26  
27  
28  
29 (62) Samara T and Tsitsoni T, *Road traffic noise reduction by vegetation in the city ring*  
30 *road of a big city*, in *Proceedings of the International Conference on Environmental*  
31 *Management, Engineering, Planning and Economics*, Kungolos A, Aravossis K,  
32 Karagiannidis A, and Samaras P, Editors. 2007: Skiathos. p. 2591-2596.  
33  
34  
35  
36  
37 (63) Zhang M and Kang J, Towards the evaluation, description, and creation of  
38 soundscapes in urban open spaces. *Environ Plann B*, 2007. **34**: p. 68-86.  
39  
40  
41  
42 (64) Völker S, Kistemann T. The impact of blue space on human health and well-being  
43 - Salutogenetic health effects of inland surface waters: a review. *Int J Hyg*  
44 *Environ Health*. 2011 Nov;214(6):449-60.  
45  
46  
47  
48 (65) Völker S and Kistemann T. "I'm always entirely happy when I'm here!" Urban  
49 blue enhancing human health and well-being in Cologne and Düsseldorf, Germany.  
50 *Social Science & Medicine* 2013 Feb;78:113-24  
51  
52  
53  
54  
55 (66) White MP, Alcock I, Wheeler BW, et al. Coastal proximity, health and well-being:  
56 Results from a longitudinal panel survey. *Health Place*. 2013 Sep;23:97-103.  
57  
58  
59  
60

- 1  
2  
3  
4 (67) Schwanen T, Dijst M, Dieleman FM. 2002. A microlevel analysis of residential  
5 context and travel time. *Environ Plan A* 34(8):1487-1508.  
6  
7  
8  
9  
10 (68) Maas J. 2008. *Vitamin G: Green environments-Healthy environments*. Utrecht:  
11 Nivel.  
12  
13  
14 (69) EEA 2005, European Environment Agency, *CORINE land cover 2000 (CLC2000)*  
15 *100 m - version 8/2005 version 2*, Copenhagen.  
16  
17  
18  
19 (70) EEA 2010, European Environment Agency. *Urban Atlas 2010*.  
20 <http://www.eea.europa.eu/data-and-maps/data/urban-atlas/>. Created : Apr 13,  
21 2010 Published : May 28, 2010 Last modified : Apr 17, 2013  
22  
23  
24  
25  
26 (71) Weier J, Herring D. Measuring vegetation (NDVI & EVI).  
27 <http://earthobservatory.nasa.gov/Features/MeasuringVegetation/>:NASA2011. Accessed  
28 in January 2011  
29  
30  
31  
32  
33 (72) Dillen SME van, Vries S de, Groenewegen PP, et al. Greenspace in urban  
34 neighbourhoods and residents' health: adding quality to quantity. *J Epidemiol*  
35 *Community Health* 2012. 66:e8. doi:10.1136/jech.2009.104695  
36  
37  
38  
39 (73) Leidelmeijer K, Marsman G, Reijden H van der, et al. *Tussen woning en wijk. Een*  
40 *straattypologie voor Nederland*. Amsterdam: RIGO, 2002.  
41  
42  
43  
44 (74) Lenthe F van, Huisman M, Kamphuis C, et al. Een beoordelingsinstrument van de  
45 fysieke en sociale buurtkenmerken die gezondheid stimuleren dan wel belemmeren.  
46 *Eindverslag van een project gefinancierd door het Fonds Openbare Gezondheidszorg*  
47 *(OZG)*. Rotterdam: Erasmus MC, 2006.  
48  
49  
50  
51  
52  
53 (75) Gidlow CJ, Ellis NJ, Bostock S. Development of the Neighbourhood Green Space  
54 Tool (NGST) *Landscape and Urban Planning* 106 (2012) 347– 358  
55  
56  
57  
58  
59  
60

1  
2  
3 (76) Donaire-Gonzalez D, de Nazelle A, Seto E, et al. Comparison of physical activity  
4 measures using smartphone based CalFit and Actigraph. J Med Internet Res 2013  
5  
6

7  
8 (77) de Nazelle A, Seto E, Donaire-Gonzalez D, et al. Improving estimates of air  
9 pollution exposure through ubiquitous sensing technologies. Environ Pol 2013; 176:  
10 92-99  
11  
12

13  
14 (78) Shiffman S, Stone AA, Hufford MR. Ecological momentary assessment. *Annu Rev*  
15 *Clin Psychol.* 2008;4:1-32  
16  
17

18  
19 (79) Burney PG, Luczynska C, Chinn S, et al. The European Community Respiratory  
20 Health Survey. Eur Respir J 1994; May;7(5):954-60.  
21  
22

23  
24 (80) Wright J, Small N, Raynor P, et al. on behalf of the Born in Bradford Scientific  
25 Collaborators Group. Cohort profile: The Born in Bradford multi-ethnic family cohort  
26 study. International Journal of Epidemiology 2012;1-14 doi:10.1093/ije/dys112  
27  
28

29  
30 (81) Lawrence, RJ (2001) Human Ecology. IN: M. Tolba (ed.), *Our Fragile World:*  
31 *Challenges and opportunities for sustainable development, Volume 1.* EOLSS  
32 Publishers, Oxford, 2001, pp.675-693  
33  
34  
35  
36  
37  
38  
39  
40  
41  
42  
43  
44  
45  
46  
47  
48  
49  
50  
51  
52  
53  
54  
55  
56  
57  
58  
59  
60

Table 1 PHENOTYPE study mechanisms, outcomes, populations and regions

It will explore underlying mechanisms related to:

- stress reduction/restorative function
  - physical activity
  - social interaction/social cohesion
- exposure to environmental hazards (e.g. noise/acoustic quality, air pollution)

Both preventative and therapeutic effects (patients) will be considered. Outcomes of interest that are evaluated are:

- general health and well-being (including medically unexplained symptoms (MUPS))
- mental health/neural development
- stress
- cardiovascular, cancer and respiratory mortality and morbidity
- birth outcomes
- obesity

It will examine the effects for different population groups, including more vulnerable populations:

- pregnant women and/or foetus
- age groups (children, elderly)
- (lower) socio-economic status
- ethnic minorities
- patients/people with specific health complaints

It will conduct comparative studies in different regions of Europe to examine any underlying regional, social and/or cultural differences related to the meanings, uses, mechanisms and health effects of the natural environment and we will include the:

- North west (Netherlands, England)
- South (Spain)
- East (Lithuania)

Table 2 Limitations of current green space work and work undertaken by PHENOTYPE to address these

| Limitations of current available work                                                                                                                                                                                                          | What PHENOTYPE will do                                                                                                                                                                                                                                                                                                                                                                                                                                                                                                                                                                                                               |
|------------------------------------------------------------------------------------------------------------------------------------------------------------------------------------------------------------------------------------------------|--------------------------------------------------------------------------------------------------------------------------------------------------------------------------------------------------------------------------------------------------------------------------------------------------------------------------------------------------------------------------------------------------------------------------------------------------------------------------------------------------------------------------------------------------------------------------------------------------------------------------------------|
| <ul style="list-style-type: none"> <li>▪ Inconsistency and variation in indicators for green or natural space have often made it difficult to compare results from different studies.</li> </ul>                                               | <ul style="list-style-type: none"> <li>▪ Minimize the potential differences due to classification of natural space, by combining the use of conventional maps and data sources with remote sensing data and aerial photography, gather individual-level data through detailed discussions with subjects living in the areas, and use considerable stakeholder engagement to develop comparable classifications of the natural environment in different countries.</li> <li>▪ Produce a more robust and comparable evidence base on links between exposure to natural outdoor environment and human health and well-being.</li> </ul> |
| <ul style="list-style-type: none"> <li>▪ A number of disease outcomes have been studied, but besides the routinely collected data (which use ICD coding), not always in a standardized and comparable manner in different countries</li> </ul> | <ul style="list-style-type: none"> <li>▪ Produce a more robust and comparable evidence base on links between exposure to natural outdoor environment and human health and well-being, using well studied and new outcomes with standardization between countries.</li> </ul>                                                                                                                                                                                                                                                                                                                                                         |
| <ul style="list-style-type: none"> <li>▪ Potentially very sensitive groups such as pregnant women/fetus have not been studied at all.</li> </ul>                                                                                               | <ul style="list-style-type: none"> <li>▪ Extend the evidence base to new outcomes and vulnerable populations e.g. pregnant women and their foetus, chronic respiratory and cardiovascular patients, ethnic minorities and</li> </ul>                                                                                                                                                                                                                                                                                                                                                                                                 |

1  
2  
3  
4  
5  
6  
7  
8  
9  
10  
11  
12  
13  
14  
15  
16  
17  
18  
19  
20  
21  
22  
23  
24  
25  
26  
27  
28  
29  
30  
31  
32  
33  
34  
35  
36  
37  
38  
39  
40  
41  
42  
43  
44  
45  
46  
47  
48  
49

|                                                                                                                                                                                                                                      |                                                                                                                                                                                                                                                                            |
|--------------------------------------------------------------------------------------------------------------------------------------------------------------------------------------------------------------------------------------|----------------------------------------------------------------------------------------------------------------------------------------------------------------------------------------------------------------------------------------------------------------------------|
|                                                                                                                                                                                                                                      | low social economic class.                                                                                                                                                                                                                                                 |
| <ul style="list-style-type: none"> <li>Most studies focused on green space; the evidence base for the effects of blue space is very limited.</li> </ul>                                                                              | <ul style="list-style-type: none"> <li>Not only examine the effects of green space, but also of blue space.</li> </ul>                                                                                                                                                     |
| <ul style="list-style-type: none"> <li>Most of the green space studies have been conducted in the US or the North West of Europe.</li> </ul>                                                                                         | <ul style="list-style-type: none"> <li>Conduct comparable studies across Europe and produce evidence for North Western, Eastern and Southern Europe. This will deliver insights into regional, social and/or cultural differences in relation to natural space.</li> </ul> |
| <ul style="list-style-type: none"> <li>Most studies do not include actual use of the natural environment.</li> </ul>                                                                                                                 | <ul style="list-style-type: none"> <li>Consider actual use of the natural environment, an often neglected but fundamental indicator in relation to exposure to natural environments.</li> </ul>                                                                            |
| <ul style="list-style-type: none"> <li>There appeared to be differences by social group, with some apparently benefiting more than others from natural space, but the evidence is sparse.</li> </ul>                                 | <ul style="list-style-type: none"> <li>Produce a more robust and comparable evidence base on links between exposure to natural outdoor environment and human health and well-being, with special attention for effect modification by social groups</li> </ul>             |
| <ul style="list-style-type: none"> <li>A number of potential mechanisms have been suggested, including increased physical activity and social contacts for those living near natural space, natural environments exerting</li> </ul> | <ul style="list-style-type: none"> <li>Examine the proposed mechanisms (physical activity, stress, social contacts, and environmental risk factors) simultaneously in a large sample in various countries (WP2). This will enable</li> </ul>                               |



|                                                                                                                                                                                                                                                                                                                                                                                                                                                                                                                                            |                                                                                                                                                                                                                                                                                                                                                                                      |
|--------------------------------------------------------------------------------------------------------------------------------------------------------------------------------------------------------------------------------------------------------------------------------------------------------------------------------------------------------------------------------------------------------------------------------------------------------------------------------------------------------------------------------------------|--------------------------------------------------------------------------------------------------------------------------------------------------------------------------------------------------------------------------------------------------------------------------------------------------------------------------------------------------------------------------------------|
| <p>stress lowering or attention restoring effects, and reducing environmental hazards (e.g. air pollution, high temperatures). However, the studies of potential mechanisms have often been limited to assessing one mechanism at the time, which increases the likelihood of unmeasured confounding effects and misses the opportunity to study these potentially interrelated mechanisms in coherence.</p> <ul style="list-style-type: none"> <li>▪ to study the mechanisms in coherence even though they may be interrelated</li> </ul> | <p>us to study specific factors while adjusting for others, and thereby strengthening the interpretation of the results</p>                                                                                                                                                                                                                                                          |
| <ul style="list-style-type: none"> <li>▪ Unable to answer what specific quantitative and qualitative characteristics of the natural environment have a positive effect on health and well-being, through what pathways is still largely unknown.</li> </ul>                                                                                                                                                                                                                                                                                | <ul style="list-style-type: none"> <li>▪ Make classifications for the type and level of the indicators, which is important for policy makers.</li> <li>▪ Examine the importance of both quantitative (amount, type, access, use) and qualitative characteristics (acoustic quality, identity, variety, safety) of the natural environment</li> </ul>                                 |
| <ul style="list-style-type: none"> <li>▪ Limited research exploring the sustained affective, cognitive and physiological responses to a single exposure and the effects of a repeated exposure to the same natural environment</li> <li>▪ Unable to explain how policymakers and planners can design a natural environment to maximise health benefits</li> </ul>                                                                                                                                                                          | <ul style="list-style-type: none"> <li>▪ Explore longer-term changes in affect, cognitive function and physiological indicators that have to date only been studied during, or immediately after, engagement with the natural environment.</li> <li>▪ Explore the immediate, maintained and long-term effects of repeated engagement with the same natural environment on</li> </ul> |

1  
2  
3  
4  
5  
6  
7  
8  
9  
10  
11  
12  
13  
14  
15  
16  
17  
18  
19  
20  
21  
22  
23  
24  
25  
26  
27  
28  
29  
30  
31  
32  
33  
34  
35  
36  
37  
38  
39  
40  
41  
42  
43  
44  
45  
46  
47  
48  
49

|                                                                                                                                               |                                                                                                                                |
|-----------------------------------------------------------------------------------------------------------------------------------------------|--------------------------------------------------------------------------------------------------------------------------------|
|                                                                                                                                               | affect, cognitive function, and physiological indicators of well-being .                                                       |
| <ul style="list-style-type: none"> <li>▪ Guidelines of lifestyle, health and well being have largely undervalued local populations</li> </ul> | <ul style="list-style-type: none"> <li>▪ Include lifestyle, health and well being factors of the local populations.</li> </ul> |

For peer review only

## Figure legend

Figure 1: Interdependencies of different parts of the PHENOTYPE project

## Annex-web figures

Web Figure 1 Natural outdoor environment, mechanisms and health data input in PHENOTYPE

Web Figure 2 NDVI map of Barcelona and buffers around major green space areas

Web Figure 3 Mobility pattern for a subject in Barcelona obtained with the Calfit tool

Web Figure 4 Design of data collection in 4 European case cities to study the underlying mechanism

Web Figure 5 Stakeholder input and dissemination

(All attached separately)

POSITIVE HEALTH EFFECTS OF THE NATURAL OUTDOOR ENVIRONMENT IN TYPICAL POPULATIONS IN DIFFERENT REGIONS IN EUROPE (PHENOTYPE)-A STUDY PROGRAMME PROTOCOL

**POSITIVE HEALTH EFFECTS OF THE NATURAL OUTDOOR ENVIRONMENT IN TYPICAL POPULATIONS IN DIFFERENT REGIONS IN EUROPE (PHENOTYPE)**

Mark J Nieuwenhuijsen<sup>1,2,11</sup>, Hanneke Kruize<sup>3</sup>, Christopher Gidlow<sup>4</sup>, Sandra Andrusaityte<sup>5</sup>, Josep Maria Antó<sup>1,2,11,12</sup>, Xavier Basagaña<sup>1,2,11</sup>, Marta Cirach<sup>1,2,11</sup>, Payam Davdand<sup>1,2,11</sup>, Asta Danileviciute<sup>5</sup>, David Donaire<sup>1,2,11</sup>, Judith Garcia<sup>1,2,11</sup>, Michael Jerrett<sup>9</sup>, Marc Jones<sup>4</sup>, Jordi Julvez<sup>1,2,11,12</sup>, Elise van Kempen<sup>3</sup>, Irene van Kamp<sup>3</sup>, Jolanda Maas<sup>7</sup>, Edmund Seto<sup>9</sup>, Graham Smith<sup>4</sup>, Margarita Triguero<sup>1,2,11</sup>, Wanda Wendel-Vos<sup>3</sup>, John Wright<sup>10</sup>, Joris Zufferey<sup>6</sup>, Peter Jan van den Hazel<sup>8</sup>, Roderick Lawrence<sup>6</sup>, Regina Grazuleviciene<sup>5</sup>.

<sup>1</sup> Centre for Research in Environmental Epidemiology (CREAL), Barcelona.

<sup>2</sup> CIBER Epidemiología y Salud Pública (CIBERESP), Madrid, Spain

<sup>3</sup> RIVM, Bilthoven, Netherlands

<sup>4</sup> CSHER, Stoke-on-Trent, United Kingdom

<sup>5</sup> Vytauto Didziojo Universitetas, Kaunas, Lithuania

<sup>6</sup> University of Geneva, Geneva, Switzerland

<sup>7</sup> VUMC, Amsterdam, Netherlands

<sup>8</sup> VGGM, Arnhem, Netherlands

<sup>9</sup> UCB, University of California Berkeley, United States

<sup>10</sup> Bradford Hospital Trust

<sup>11</sup> Universitat Pompeu Fabra (UPF)

<sup>12</sup> IMIM (Hospital del Mar Medical Research Institute)

Mark J Nieuwenhuijsen<sup>1,2</sup>, Hanneke Kruize<sup>3</sup>, Christopher Gidlow<sup>4</sup>, Sandra Andrusaityte<sup>5</sup>, Josep Maria Antó<sup>1,2</sup>, Xavier Basagaña<sup>1,2</sup>, Marta Cirach<sup>1,2</sup>, Payam Davdand<sup>1,2</sup>, Asta Danileviciute<sup>5</sup>, David Donaire<sup>1,2</sup>, Judith Garcia<sup>1,2</sup>, Michael Jerrett<sup>9</sup>, Marc Jones<sup>4</sup>, Jordi Julvez<sup>1,2</sup>, Elise van Kempen<sup>3</sup>, Irene van Kamp<sup>3</sup>, Jolanda Maas<sup>7</sup>, Edmund Seto<sup>9</sup>, Graham Smith<sup>4</sup>, Margarita Triguero<sup>1,2</sup>, Wanda Wendel-Vos<sup>3</sup>, John Wright<sup>10</sup>, Joris Zufferey<sup>6</sup>, Peter Jan van den Hazel<sup>8</sup>, Roderick Lawrence<sup>6</sup>, Regina Grazuleviciene<sup>5</sup>.

<sup>1</sup> Centre for Research in Environmental Epidemiology (CREAL), Barcelona.

<sup>2</sup> Consortium for Biomedical Research in Epidemiology and Public Health (CIBER-en Epidemiología y Salud Pública CIBERESP), Madrid, Spain <sup>3</sup> RIVM, Bilthoven, Netherlands

<sup>4</sup> CSHER, Stoke-on-Trent, United Kingdom

<sup>5</sup> Vytauto Didziojo Universitetas, Kaunas, Lithuania

<sup>6</sup> University of Geneva, Geneva, Switzerland

<sup>7</sup> VUMC, Amsterdam, Netherlands

<sup>8</sup> VGGM, Arnhem, Netherlands

<sup>9</sup> UCB, University of California Berkeley, United States

<sup>10</sup> Bradford Hospital Trust

Project management and contact: Diana van Gent (CREAL); [dvangent@creal.cat](mailto:dvangent@creal.cat)

1  
2  
3  
4  
5  
6  
7  
8  
9 Mark J Nieuwenhuijsen PhD  
10 Research Professor in Environmental Epidemiology  
11 Center for Research in Environmental Epidemiology (CREAL)  
12 Parc de Recerca Biomèdica de Barcelona - PRBB (office 183.05) C. Doctor Aiguader,  
13 88, 08003 Barcelona , SPAIN  
14 Tel.: direct (++34) 93 2147337  
15 Assistant: Mar Ferrer: (++34) 93 2147330  
16 mferrer1@creal.cat  
17 FAX: (++34) 93 2147302  
18 Email: mnieuwenhuijsen@creal.cat  
19 Webpages: <http://www.creal.cat/>  
20 **www.phenotype.eu**  
21  
22  
23  
24  
25  
26  
27  
28  
29  
30  
31  
32  
33  
34  
35  
36  
37  
38  
39  
40  
41  
42  
43  
44  
45  
46  
47  
48  
49  
50  
51  
52  
53  
54  
55  
56  
57  
58  
59  
60

## Abstract

**Introduction:** Growing evidence suggests that close contact with nature brings benefits to human health and well-being, but the proposed mechanisms are still not well understood and the associations with health ~~effects~~ remain uncertain. The Positive Health Effects of the Natural Outdoor environment in Typical Populations in different regions in Europe (PHENOTYPE) project investigates the interconnections between natural outdoor environments ~~, in both rural and urban settings,~~ and better human health and well-being ~~being in the North West, South and East of Europe. Here we provide a description of the proposed work.~~

**Aims and methods:** The PHENOTYPE project explores the proposed underlying mechanisms at work (stress reduction/restorative function, physical activity, social interaction, exposure to environmental hazards) and examines the associations with health effects-outcomes ~~(e.g. general health and wellbeing, mental health/neural development, stress, cardiovascular, cancer and respiratory mortality and morbidity, birth outcomes and obesity)~~ for different population groups ~~(e.g. pregnant women and/or foetus, different age groups, socioeconomic status, ethnic groups, and patients)~~. It implements conventional and new innovative high tech methods to characterize the natural environment in terms of quality and quantity. Preventive as well as therapeutic effects of contact with the natural environment are being covered. PHENOTYPE further addresses implications for land-use planning and green space management.

**Result:** The main innovative part of the study is the evaluation of possible short and long term effect associations of green space and health and the possible underlying mechanisms in 4 different countries (with quite different type of green space and use of green space) using the same methods and methodology in one research program. This type of holistic approach has not been undertaken before. Furthermore there are technological innovations such as the use of remote sensing and smartphones in the assessment of green space.

**Conclusion:** The project will produce a more robust evidence base on links between exposure to natural outdoor environment and human health and well-being, in addition

Formatted: Font: Not Bold

1  
2  
3  
4  
5  
6 to a better integration of human health needs into land use planning and green space  
7 management in rural as well as urban areas.  
8  
9

10  
11 **Keywords:** green space, blue space, health, well being, physical activity, social  
12 contacts, restoration, stress, air pollution, remote sensing, GIS, audit, questionnaire  
13 survey, smartphones  
14  
15  
16  
17  
18  
19  
20  
21  
22  
23  
24  
25  
26  
27  
28  
29  
30  
31  
32  
33  
34  
35  
36  
37  
38  
39  
40  
41  
42  
43  
44  
45  
46  
47  
48  
49  
50  
51  
52  
53  
54  
55  
56  
57  
58  
59  
60

## Article summary

### Strengths

The PHENOTYPE project is the largest European project on green space and health

The PHENOTYPE project examines simultaneously the possible underlying mechanisms (stress reduction/restorative function, physical activity, social interaction, exposure to environmental hazards) for the relationship between green space and health in 4 different countries in Europe

The PHENOTYPE project examines a range of possible associations of the natural outdoor environment and health ~~health effects of green space~~ using 16 different cohorts and/registries in 4 different European countries

The PHENOTYPE project uses a range of novel tools and methods to assess access and use of green space including remote sensing, smartphones, audits and interviews.

The PHENOTYPE project works closely with stakeholders and produces new information for stakeholders.

### Weakness

~~The limited funding may not lead to the full exploitation by the wealth of data generated within the life time of the project~~



## Introduction

Positive health effects have been observed between green space and mortality longevity[1-3]([Takano et al. 2002](#); [Mitchell and Popham 2008](#), [Villeneuve et al. 2012](#)), cardiovascular disease[4]([Pereira et al. 2012](#)), people's self reported general health[5,6]([de Vries et al. 2003](#); [Maas et al. 2006](#)), mental health[7-11]([Grahn & Stigsdotter, 2003](#); [Hartig et al. 2003](#); [Maas, et al. 2009b](#); [Ottoosson & Grahn, 2005](#); [Richardson et al. 2013](#)), sleep patterns[12]([Astell-Burt et al. 2013a](#)), recovery from illness[13]([Ulrich 1994](#)), social health aspects[14-18]([Kim & Kaplan, 2004](#); [Sullivan et al. 2004](#); [Kweon et al 1998](#); [Maas et al. 2009a](#); [de Vries 2010](#)) and birth outcomes[19-21]([Donovan et al. 2012](#); [Dadvand et al. 2012a](#), [Dadvand et al. 2012b](#)). Some of the associations were shown to be modified by social economic status and level of urbanity, with greater benefits for populations with lower socioeconomic class[20,22]([Mitchell & Popham, 2008](#), [Dadvand et al. 2012a](#)) and those in more urban areas[6,22]([Maas et al. 2006](#); [Mitchell et al. 2007](#)). Furthermore gender has been shown to modify the relationship[11]([Richardson and Mitchell 2010b](#)).

Increased physical activity and social contacts, psychological restoration/stress reduction, and a reduction in pollutants such as noise and air pollution, and temperature have been proposed as possible mechanisms for the health benefits of green space. Access to and/or use of green space has been associated with higher levels of physical activity[23-33]([Cohen et al. 2006](#); [Cohen et al. 2007](#); [Coombes et al. 2010](#); [Lachowycz and Jones 2011](#); [Toftager et al. 2011](#); [Rodriguez et al. 2012](#); [Mytton et al. 2012](#); [Annerstedt et al. 2012](#); [Almanza et al. 2012](#); [Astell-Burt et al. 2013b](#); [Richardson et al. 2013](#)) and lower levels of obesity within communities[25,27,34-38]([Coombes et al. 2010](#); [Ellaway et al. 2005](#); [Wolch et al. 2011](#); [Toftager et al. 2011](#); [Pereira et al. 2013](#); [Astell-Burt et al. 2013c](#); [Lovasi et al 2013](#)). Studies even suggested that 'green exercise' can have even more positive mental health benefits than other kinds of exercise[39-42]([Bodin et al. 2003](#); [Pretty et al. 2005](#); [Bowler et al. 2010](#); [Thompson Coon et al. 2011](#)).

Psychological restoration[43-45]([Kaplan & Kaplan, 1989](#); [van den Berg et al. 2003](#); [van den Berg & Custers, 2011](#);) and reduced stress and anxiety[7,8,17,46,47]([Ulrich et al., 1991](#), [Grahn & Stigsdotter, 2003](#); [Hartig et al. 2003](#); [Maas et al. 2009](#); [Stigsdotter et al 2010](#)) have all been associated with access to and/or use of green and natural space.

1  
2  
3  
4  
5  
6 An inner city study in a deprived estate in Chicago showed the benefits of green space  
7 both to cognitive restoration[48,49](Faber Taylor 2002; Kuo & Sullivan, 2001a), self-  
8 discipline[48](Faber Taylor et al. 2002), reduced aggression[49](Kuo & Sullivan,  
9 2001a) and reduced crime[50](Kuo & Sullivan, 2001b), with the latter also observed  
10 elsewhere recently[51](Wolfe and Mennis 2013)  
11  
12  
13

14  
15 Furthermore a few studies have suggested that green space is associated with more  
16 social contacts and cohesion[16,17,52](Kuo et al. 1998; Kweon et al. 1998; Maas et al  
17 2009).  
18

19 And finally reduction of personal exposure to air pollution has been observed in areas  
20 with more green space[53](Dadvand et al. 2012e), while vegetation has been suggested  
21 to reduce air pollution levels, and temperature[54-57](Baldauf et al. 2009; Su et al.  
22 2011; Park et al. 2012a, 2012b), with some suggestion that the benefits are greater for  
23 socially disadvantaged groups[55](Su et al. 2011). It has also been suggested that  
24 vegetation (trees, plants) and soil may have an impact on the sound level[58-63](Aylor,  
25 1972; Fan et al. 2010; Fang & Ling, 2003, 2005; Samara & Tsitsoni, 2007; Zhang &  
26 Kang, 2007). Part of the appeal of green spaces may be related to pleasant acoustic  
27 environments (Brown, 2006 in: Health Council of the Netherlands, 2006). This may  
28 have its own, direct beneficial health effect (Health Council of the Netherlands, 2006).  
29  
30  
31  
32  
33  
34

35 While this growing evidence exists that close contact with nature brings benefits to  
36 human health and well-being, the proposed mechanisms are still not well understood  
37 and the associations with health effects remain uncertain. Furthermore, it is unclear if  
38 the possible mechanisms act in isolation or together, since with some exceptions[18](de  
39 Vries et al. 2013) they have been studied in isolation. A coherent conceptual framework  
40 on the proposed mechanisms is currently lacking. Also, most of the research has been  
41 conducted in the North West of Europe and USA leaving questions about the  
42 generalisability to other regions. Inconsistency and variation in indicators (eg type, size  
43 and quality) for green space have often made it difficult to compare results from  
44 different studies, and a better characterisation including that of quantity and quality of  
45 green and blue spaces is needed, not only for research but also for policymakers and  
46 spatial planners. Studies have often focused on access to green space without taking into  
47 account actual use of green space. While blue space may also have a positive effect on  
48 health, probably in combination with green space, there are only a few epidemiological  
49  
50  
51  
52  
53  
54  
55  
56  
57  
58  
59  
60

1  
2  
3  
4  
5  
6 studies investigating this [\[64-66\]](#) ([Völker and Kistemann 2011](#), [Völker and Kistemann](#)  
7 [2013](#), [White et al. 2013](#))  
8  
9

10 PHENOTYPE, a collaborative research project and explores the proposed underlying  
11 mechanisms at work (stress reduction/restorative function, physical activity, social  
12 interaction, exposure to environmental hazards). PHENOTYPE is the first study  
13 designed to examine these mechanisms simultaneously in a large sample (N=4000  
14 subjects) in various European countries using the same methodology. This allows the  
15 study of specific factors while adjusting for others, and thereby strengthening the  
16 interpretation of the results. It further examines both the long term and short term ~~health~~  
17 ~~effects-associations with health~~ (eg general health and wellbeing, mental health/neural  
18 development, stress, cardiovascular, cancer and respiratory mortality and morbidity,  
19 birth outcomes and obesity) for different population groups (e.g. pregnant women  
20 and/or foetus, different age groups, socioeconomic status, ethnic groups, and patients),  
21 through analyses of existing cohort studies, observational studies and experiments.  
22 Preventive as well as therapeutic effects of contact with the natural environment are  
23 being evaluated. A coherent conceptual framework on the association between the  
24 natural environment and its effects on health and well-being is being developed, and it  
25 addresses implications for land-use planning and green space management.  
26  
27  
28  
29  
30  
31  
32  
33  
34

35 The study includes both rural and urban settings, but the main focus is on the urban  
36 environment, for a number of reasons. Most of the population lives in urban areas  
37 (75%) in Europe, making these of greater relevance to public health, and rapid  
38 urbanization continues to reduce accessible natural environments for urban residents.  
39 Most people make more frequent use of the green spaces in their nearby living  
40 environment instead of travelling greater distances to rural areas, in particular people  
41 with lower socio-economic status, elderly people and children [\[67,68\]](#) ([Schwanen et al.](#)  
42 [2002](#); [Maas 2008](#)). Furthermore, rural dwellers tend to have constant contact with the  
43 natural environment and it may therefore also be more difficult to assess its effects.  
44  
45  
46  
47  
48  
49

50 Lastly, the project uses an interdisciplinary and integrated approach, applying the best  
51 and most efficient methods to understand the relation between exposure to the natural  
52 environment and health. It implements conventional and ~~new~~ innovative high tech  
53  
54  
55  
56  
57  
58  
59  
60

1  
2  
3  
4  
5  
6 methods to characterize the natural environment in terms of quality and quantity. This  
7 paper provides a general overview of the research methodology of PHENOTYPE.  
8  
9

## 10 11 12 **Methods and results** 13

14  
15 Figure 1 summarizes the different parts of the study and the interdependencies between  
16 the different parts, namely the characterisation of the natural environment and the way it  
17 is used, examination of the underlying mechanisms in daily life settings, short and long  
18 term effects of the natural environment, and the implications for management and  
19 policy of the natural environment (see overview Figures 1 and web figure 1). In this  
20 section we will elaborate on each of these parts. A summary of the mechanisms,  
21 outcomes, populations and areas selected for investigation are given in Table 1.  
22  
23  
24  
25  
26  
27

### 28 *Characterising the natural environment and the way it is used.* 29

30  
31 The research includes evaluation of the natural environment, which includes for the  
32 purposes of the project:

- 33 - Green spaces (e.g. roof gardens, city parks, court yards) and “greenery”; forests, nature  
34 reserves/parks, mountains, farmland, trees, landscaping
- 35 - Blue spaces; water such as canals, ponds, creeks, rivers, beaches etc.

36  
37 Although many of these may actually not be “natural” since they have been man-made,  
38 for the purpose of the project we classify them as such.  
39  
40  
41  
42

43 One of the main aims of PHENOTYPE is to examine the importance of both  
44 quantitative (e.g. amount, type, access, use) and qualitative characteristics (e.g. acoustic  
45 quality, identity, variety, safety, rubbish) of the natural environment by collecting  
46 detailed data on these characteristics using a combination of methods. The focus lies on  
47 natural environments at different scales and distances from the home (city/town,  
48 neighbourhood, street level) and where possible also at other places where people stay  
49 (work, school, on their way to home/school, recreational). In addition, actual use of the  
50 natural environment is taken into consideration. To achieve the aim, a detailed  
51 assessment will be conducted in 4 case cities (Barcelona, Spain; Doetinchem, the  
52  
53  
54  
55  
56  
57  
58  
59  
60

1  
2  
3  
4  
5  
6 Netherlands; Kaunas, Lithuania; and Stoke-on-Trent, United Kingdom), with less  
7 detailed assessment in other study areas.  
8  
9

10 PHENOTYPE uses conventional land use maps, remote sensing data from satellites and  
11 aerial photography, complemented by detailed discussions with volunteers and other  
12 stakeholder living and working in the studied areas to derive comparable classifications  
13 of the natural environment in different countries. Collected data will contribute to the  
14 characterisation of the natural environment (both quantitative and qualitative e.g.  
15 accessibility, acoustical quality, recreational activities, walkability etc). For the  
16 quantitative characterisation, PHENOTYPE makes use of available land use maps such  
17 as COordination and INformation on the Environmental programme, initiated by the  
18 European Commission (CORINE)[69](EAA-2005) and Urban Atlas[70](EAA-2010),  
19 and remote sensing and aerial photography to obtain comparable indices such as  
20 NDVI[71](Weier and Herring, 2011) of the natural outdoor environment in different  
21 countries. Landsat Enhanced Thematic Mapper Plus (ETM+) data are applied to a  
22 classification and regression tree (CART) model to categorise land cover types for the  
23 urban areas of interest[55](Su et al 2010). Early application of the NDVI in Barcelona,  
24 Spain showed good results[20] (Web Figure 2), Dadvand et al. 2012a)

25  
26  
27  
28  
29  
30  
31  
32  
33  
34 To collect additional qualitative information on the natural environment and on other  
35 physical and social features, systematic observations (audits) are conducted by trained  
36 researchers in selected neighbourhoods in the 4 -case cities using the same methods.

37  
38 Since it is not feasible and not necessary to audit every street in a selected  
39 neighbourhood, a purposeful sample of streets is drawn, ensuring that important  
40 neighbourhood features are included. The selected neighbourhoods are divided into  
41 more or less homogeneous sub-areas by means of data/maps on land use/function of  
42 areas in combination with local knowledge of the area. Subsequently, trained auditors  
43 are asked to visit the sub-areas and observe them in a systematic way (auditing) using a  
44 paper form containing several close-ended questions. Every sub-area is visited by two  
45 auditors. For the first 1-2 areas, the auditors fill in the list together, discussing  
46 completion to reach consensus. In subsequent areas, where possible, the two auditors  
47 complete the audit independently and simultaneously. Furthermore, up to two natural  
48 environments of more than one hectare in size are selected per neighbourhood using  
49 GIS. Again following training in completion of the audit, two auditors visit the  
50  
51  
52  
53  
54  
55  
56

Formatted: Font: (Default) Times New Roman, 12 pt

Formatted: Font: (Default) Times New Roman, 12 pt

1  
2  
3  
4  
5  
6 environments. For the first five areas, auditors undertake the interview together,  
7 discussing completion to reach consensus, thus maximizing consistency. In subsequent  
8 areas, where possible, two assessors complete the audit independently and  
9 simultaneously. In the absence of existing measures that could meet our requirements,  
10 the streetscape audit was developed for this project and the natural environment tool  
11 was adapted from an existing measures. This kind of bespoke tool development is seen  
12 in similar studies e.g.[72] (e.g., Van Dillen et al. 2012.). One form is used for evaluating  
13 the streetscape, using indicators derived from the Street Typology developed by  
14 Leijdelmeijer et al. (2002)[73], a list of evaluating the quality of green by Van Dillen  
15 (2012)[72] and the audit tool developed by Van Lenthe et al. (2006)[74]. The natural  
16 environment audit is adapted from that developed by Gidlow et al (2012)[75] through  
17 addition of items and domains to reflect the greater diversity in natural environments to  
18 be included (i.e., different types of natural environment across four European cities).  
19 The tools were piloted and adjusted prior to use. They have not been ‘validated’, but  
20 there is no gold standard quality measure for natural environments against which to  
21 compare. Inter-rater reliability will be estimated through derivation of Inter-rater  
22 Correlation Coefficients (ICC) and PCA will be used to ensure that any redundant items  
23 are removed and included items are grouped sensibly into domains, before overall  
24 quality scores will be derived.

25 The researchers walk through the neighbourhood, systematically coding characteristics  
26 such as the architectural character, maintenance of the landscape, and perceptions on  
27 how a place looks and feels. To collect comparable information in the 4 case cities, two  
28 standardized forms are used. One form is used for evaluating the streetscape, using  
29 indicators derived from the Street Typology developed by Leijdelmeijer et al. (2002), a  
30 list of evaluating the quality of green by Van Dillen (2012) and the audit tool developed  
31 by Van Lenthe et al. (2006). A second form is used for evaluating the natural spaces in  
32 the study areas of at least 1 ha. It is an adapted form of the Neighbourhood Green Space  
33 Tool developed by Gidlow et al. (2012).

34  
35  
36  
37  
38  
39  
40  
41  
42  
43  
44  
45  
46  
47  
48  
49 To gain insight into the way people use the natural environment, a face to face  
50 questionnaire survey is conducted to collect data on 1000 people in the 30 selected  
51 neighbourhoods in each of the 4 case cities, and an in-depth study using “Calfit”, a  
52 smartphone-based monitor of time-location patterns and momentary states, on a  
53 subsample (n=100) of the participants of the questionnaire survey (for further detailed  
54  
55  
56

Formatted: Font: Times New Roman, 12 pt

1  
2  
3  
4  
5  
6 information, see next section on underlying mechanisms). The Calfit software<sup>[76,77]</sup>  
7 (Donaire-Gonzales et al. 2013, de Nazelle et al. 2013) runs on a Google Android  
8 operating system and as currently configured can collect data on physical activity using  
9 the motion sensor and geographic location through a global positioning system (GPS), to  
10 obtain information on minutes spent and physical activity levels in different natural  
11 environments (Web Figure 3). The instrument has been validated against the Actigraph  
12 accelerometer<sup>[76]</sup> (Donaire-Gonzales et al. 2013), combined with other pollution  
13 measurements to assess likely inhalation<sup>[77]</sup> (de Nazelle et al. 2013), and lab-validated  
14 using the Cosmed metabolic monitoring system.  
15  
16  
17  
18  
19

20  
21 The work will produce different indicators of natural space that can be used in the  
22 studies described below. The aim is to make a hierarchy of indicators with on the  
23 bottom simple measures such as NDVI that can be easily obtained for all the study areas  
24 and on the top detailed measures of for example green space with actually information  
25 on the quantity, quality and use that can only be obtained for only some areas after in-  
26 depth study. –As part of the work, we will examine the relationship between the simple  
27 and detailed measures to better understand how detailed information on small scale can  
28 help the interpretation of health studies conducted in larger areas with only simple  
29 measures available using existing epidemiological studies and registries (see below).  
30  
31  
32  
33  
34

### 35 *Examining the underlying mechanism in the daily life setting*

36  
37  
38  
39 New data will be collected to explore in detail and simultaneously the proposed  
40 mechanisms (physical activity, social contacts/cohesion, psychological restoration/stress  
41 reduction) underlying the relationship between the natural environment and health and  
42 well-being, in the four case cities. In each of these cities ~~30~~ neighbourhoods varying in  
43 socio-economic status and in their distance to green space are selected. In these  
44 neighbourhoods the natural environment will be characterised, and (as mentioned above  
45 already) a selection of 1000 randomly selected residents (4000 in total, 18-75 years)  
46 will participate in a questionnaire survey, 100 in a smartphone study, and 20 in in-depth  
47 interviews (Web Figure 4).  
48  
49  
50  
51  
52

53 To optimally investigate what types of natural environments and different levels of  
54 accessibility are relevant in relation with the mechanisms that we investigate (physical  
55  
56  
57  
58  
59  
60

Formatted: Font: Times New Roman, 12 pt

Formatted: Font: Times New Roman, 12 pt, English (U.S.)

Formatted: Font: Times New Roman, 12 pt

Formatted: Font: Times New Roman, 12 pt, English (U.S.)

1  
2  
3  
4  
5  
6 activity, stress and restoration, social interactions and environmental pollution), and to  
7 investigate potential differences in this mechanism among the population, we use a  
8 multiple level approach and select neighbourhoods with different socio-economic status  
9 (SES) and access to the natural environment. We use existing statistical or  
10 administrative units with Existing statistical or administrative units that were as similar  
11 as possible with regard to variation in population size; in Stoke-on-Trent Lower Layer  
12 Super Output Areas (LSOAs), in Barcelona census areas, in Kaunas voting districts and  
13 in Doetinchem neighborhoods. Natural space and SES measures are assigned to all the  
14 units, using existing data. For natural space, Urban Atlas is used for Stoke-on-Trent,  
15 Barcelona and Kaunas. Since Urban Atlas is not available for Doetinchem, data of  
16 another Dutch database ('Top10 nl') is used. For SES no comparable data existed for  
17 the 4 cities. Therefore partners use their own local data. Then the units are ranked by  
18 each natural space and SES. Subsequently a selection of two neighbourhoods from each  
19 combination of top, middle and bottom tertiles of SES and quintiles of the natural space  
20 is made (approx. 2\*3\*5= 30 units). A few extra units are added to optimize contrast  
21 and reach a sufficient number units to be able to recruit a 1000 subjects in each city (30  
22 subjects per units). Since there is no common person registries in these countries,  
23 subjects (aged between 18 and 75) are selected using different approaches. In  
24 Doetinchem and Stoke-on-Trent, addresses are sampled randomly from the BAG  
25 Registry ('Buildings and Adresses') 2012 and a local address registry respectively and  
26 the person with the closest birthday to the interview data is selected at each address, in  
27 Barcelona subjects are randomly selected from the person registry (empadronamiento)  
28 and in Kaunas subjects are sampled randomly from a 2006-2009 survey of randomly  
29 sampled people of the city of Kaunas. In each case there is an over selection of  
30 potential addresses or subjects to be able to interview at least a 1000 subjects (and 30  
31 per unit) in each city. The target of a 1000 subjects per city was based on the available  
32 budget. To enable multi-level analysis, we estimated that a minimum of 30 participants  
33 per group (or neighbourhood) were required, with a minimum of 30 groups.  
34 The choice of items was based on the proposed mechanisms and was achieved via an  
35 interactive process of experts within the PHENOTYPE team and others in the  
36 institutions involved. As much as possible questions were derived from existing and  
37 validated indices. The questionnaire was piloted by the four centers separately with  
38 specific attention for comprehensibility, clarity and duration and was adapted based on  
39 these pilots. The questionnaire is structured along several main clusters of questions: i)  
40  
41  
42  
43  
44  
45  
46  
47  
48  
49  
50  
51  
52  
53  
54  
55  
56  
57  
58  
59  
60

Formatted: Font: Times New Roman, 12 pt

Formatted: Font: Times New Roman, 12 pt, English (U.S.)

Formatted: Font: Times New Roman, 12 pt

Formatted: Font: Times New Roman, 12 pt, English (U.S.)

Formatted: Font: Times New Roman, 12 pt, English (U.S.)



1  
2  
3  
4  
5  
6 residential situation: ii) dwelling iii) wellbeing and health, and iv) personal  
7 characteristics. It includes questions on perceived quality and use of green and blue  
8 space in the residential area and in the immediate living environment, perceived  
9 environmental and social quality including aspects as noise, amenities and social  
10 cohesion, lifestyle, subjective health and questions related to personal background. The  
11 questionnaire was developed in English and translated and back translated in Dutch,  
12 Spanish and Lithuanian. More details on the frameworks and questionnaire will be  
13 described in a forthcoming paper by Van Kamp et al. (In prep). Also we will assessment  
14 cognitive fatigue in each subject as measured by CTT.

15  
16 The questionnaire survey was designed to investigate three potential mechanisms in  
17 relation to natural environments and health: via physical activity, stress and restoration  
18 and social interactions as described in. In addition questions are included about  
19 environmental worries and reactions to perceived exposures (air pollution, noise, etc).  
20 The choice of indicators was based on these three mechanisms and was achieved via an  
21 interactive process of experts within the PHENOTYPE team. As much as possible  
22 questions were derived from existing and validated indices, some tailored to the specific  
23 objectives of PHENOTYPE. The questionnaire was developed in English and was  
24 translated (and back translated?) into Dutch, Spanish, Catalan, and Lithuanian. The  
25 questionnaire was developed to be applied in an oral interview of at maximum 60  
26 minutes. In Kaunas it is not common to have face-to-face interviews; therefore a written  
27 questionnaire is sent by post to the selected people. The questionnaire was piloted by all  
28 partners, with specific attention for comprehensibility, clarity and duration and was  
29 adapted at some points based on outcomes of these pilots.

30  
31 The final questionnaire is structured along four main clusters of questions: I. Green and  
32 Blue Spaces; II Residential situation: Dwelling & Neighbourhood; III Wellbeing and  
33 Health; IV Personal characteristics. Per mechanism questions are asked about  
34 availability, use, importance, and satisfaction. In the sequencing of the questions we  
35 strive for a coherent set of questions per cluster moving from general to specific and  
36 from “easy” to more intruding questions. Furthermore, most of the answer categories  
37 moved from neutral negative towards positive items.

38  
39 For all answers showcards have been developed by RIVM, to make it easier for both  
40 interviewers and respondents, and to speed up the interview process. A separate  
41 instruction document was developed to train the interviewers. The questionnaire ended  
42 with an optional a pencil paper attention test (Color Trails Test (CTT-A)) add ref.  
43  
44  
45  
46  
47  
48  
49  
50  
51  
52  
53  
54  
55  
56  
57  
58  
59  
60

Formatted: Font: (Default) Times New Roman, 12 pt, English (U.S.)

1  
2  
3  
4  
5  
6  
7  
8 Finally for the smartphone study at least 100 volunteers from each country are randomly  
9 selected from the participants of the questionnaire survey who indicated that they were  
10 willing to participate in the smartphone study. For these subjects,

Formatted: Font: (Default) Times New Roman, 12 pt, English (U.S.)

Formatted: English (U.S.)

11 ~~From the 1,000 volunteers in each of the 4 case cities who complete the questionnaire,~~  
12 ~~100 people are approached to take part in a smartphone study (100 in total).~~ During 7  
13  
14  
15  
16  
17  
18  
19  
20  
21  
22  
23  
24  
25  
26  
27  
28  
29  
30  
31  
32  
33  
34  
35  
36  
37  
38  
39  
40  
41  
42  
43  
44  
45  
46  
47  
48  
49  
50  
51  
52  
53  
54  
55  
56  
57  
58  
59  
60  
subsequential days the emotional state of the subject, the local environment (e.g.,  
different quantities or qualities of natural space) and the social setting are assessed with  
the smartphone and the innovative Calfit technology. Besides objective geolocation and  
physical activity (see section [Characterisation the natural environment](#)), subjective data  
on stress reduction/restoration and social contacts are collected simultaneously. The  
latter data are collected through interactive diaries capable of eliciting ecological  
momentary assessment (EMA). EMA is a novel approach to elicit responses to  
electronic surveys throughout the course of daily life<sup>[78]</sup> (Shiffman et al. 2008). The  
participant receives prompts at random intervals to complete small surveys on the  
phone, which then have time and location stamp.

From the people who participate in both the questionnaire survey and the CALFIT study  
and who indicate they wanted to volunteer, 80 people (20 in each case city) are  
approached for semi structured interviews. These interviews are conducted to gain more  
detailed information on specific topics included in the questionnaire survey and  
CALFIT/EMA. Topics addressed include the motivation for travel routes, the **effect**  
**associations** of natural environment ~~on-with~~ mood, behaviour and well-being, the  
attitude towards and importance of (experiences with) natural environment, and reasons  
for using or not using the natural environment.

#### ***Epidemiological studies to examine long term effects of the natural environment***

By using existing epidemiological studies and registries and linking these to the natural  
space indicators described earlier, the association between natural environment and a  
range of different long term health **effects-outcomes** will be examined in an efficient and  
cost effective manner. PHENOTYPE makes use of 16 existing cohorts and registries  
with good health outcome data in Spain, the Netherland, Lithuania, and United  
Kingdom (Web Table 1), linking these to newly created natural environment indicators.

1  
2  
3  
4  
5  
6 Comparable estimates are produced for various regions in Europe for the ~~effects~~  
7 ~~on~~associations with pregnancy outcomes, foetus development, children's health and  
8 adult population morbidity and mortality. We specifically focus on:  
9

- 10 • the natural outdoor environment and ethnicity, socio-economic status, women's  
11 health and pregnancy outcomes;
- 12 • the natural outdoor environment and foetus development, birth weight, and  
13 gestational age;
- 14 • the natural outdoor environment and general development, neurodevelopment,  
15 cognitive function and respiratory health in children;
- 16 • the natural outdoor environment and respiratory health in various European cities;
- 17 • the natural outdoor environment and general health, physical activity, specific  
18 morbidity and mortality.

19  
20  
21  
22  
23  
24  
25  
26 The assessment of natural environment indicators will be mainly based on satellite data  
27 and land use maps as CORINE and Urban atlas, and sometimes local data. This will  
28 restrict to some extent the evaluation of the ~~effect of~~association with the natural  
29 environment, but this is the only realistic and achievable approach. All studies  
30 examine the role of socio-economic status, which has been suggested as an effect  
31 modifier for the relationship between exposure to the natural environment and health  
32 benefits. The European Community Respiratory Health study (ECRHS)[\[79\]](#) ([Burney et](#)  
33 [al-1994](#)) further allows for examination of exposure to the natural outdoor environment  
34 and ~~health effects~~associations with health in a range of different European cities. Some  
35 cohorts such as the Born in Bradford study[\[80\]](#) ([Wright et al. 2012](#)) offers a unique  
36 opportunity to investigate the role of ethnicity in the relationship between exposure to  
37 the natural outdoor environment and health benefits, in Bradford study half of the  
38 participants are from Pakistani background, with information on both the mother and  
39 baby from pregnancy to early years in life.  
40  
41  
42  
43  
44  
45

#### 46 47 ***Experiments to examine short term effects of the natural environment***

48  
49  
50 To examine short term effects of the natural environment on health and well-being, one  
51 or more experimental studies are conducted in each country in which individuals are  
52 exposed to different types of natural and urban environments (i.e., environmental  
53  
54  
55  
56  
57  
58  
59  
60

1  
2  
3  
4  
5  
6 conditions). The majority of data collection is field-based to maximise the ecological (as  
7 well as internal) validity of any observed effects.  
8

9 Using a range of psychological and physiological indicators relevant to the various  
10 possible mechanisms, and 2) healthy and patient population groups (with mental and/or  
11 somatic morbidities) we will collectively explore:~~Using a range of psychological and~~  
12 ~~physiological indicators relevant to the various possible mechanisms, and inclusion of~~  
13 ~~healthy and patient population groups (with mental and physical morbidities)~~  
14 ~~collectively explore:~~  
15

Formatted: Font: Times New Roman, 12 pt

- 16  
17  
18 - preventive and therapeutic effects of natural environments.  
19 - immediate and sustained changes in affective, cognitive and physiological  
20 responses indicative of well-being while engaged in a natural environment, and  
21 after leaving a natural environment  
22  
23 - neurobiological responses to viewing natural or urban scenes before/after  
24 experiencing stress.  
25  
26  
27

28 Through variation in experimental design, each partner makes a novel contribution(s) to  
29 the area as (details in Web Table 2):  
30

- 31 • UK: In healthy individuals, Study 1 compares immediate and post-exposure psycho-  
32 physiological effects of urban versus natural environments to explore whether any  
33 beneficial effects are sustained following single exposures; Study 2 uses longer-term  
34 follow-up and repeated exposure to natural environments to explore whether any  
35 effects are accumulated, sustained or attenuated.  
36  
37 • Netherlands: an experimental functional Magnetic Resonance Imaging (fMRI) study  
38 is conducted in healthy individuals to investigate neurobiological responses to  
39 viewing natural or urban scenes before/after experiencing stress; i.e., whether  
40 viewing natural compared to urban scenery can prevent or buffer against stress  
41 responses, and how this is represented in brain activation patterns.  
42  
43 • Spain: in individuals with elevated stress levels, group-based exposure and  
44 Ecological Momentary Assessment (EMA, using CALFIT technology) are used to  
45 explore the role of social interaction and the nature of physical activity, in  
46 immediate and longer term responses. Ecological validity will be enhanced through  
47 'free-living' activities within environments, rather than controlling activities, again,  
48 using EMA, GPS and accelerometry to monitor the nature (and perceptions) of this  
49 activity.  
50  
51  
52  
53  
54  
55  
56  
57  
58  
59  
60

- Lithuania: a clinical population with established coronary artery disease (CAD) are recruited to evaluate the therapeutic effect of the natural environment. The outcomes of this experiment may have direct clinical applications for the use of urban and different types of natural environment in cardiac rehabilitation.

### *Implications, policy and guidelines and involvement of stakeholders*

#### *Guidelines*

PHENOTYPE will provide recommendations for policymakers and guidelines for professional practitioners involved with spatial planning and health to create natural environments that promote health and well being. For this, we focus on a human ecological perspective which allows for a better integration of human health needs into land use planning and green space management in both rural and urban areas<sup>[81]</sup> (Lawrence 2004). Currently legal standards that have been developed with economic, technological and political priorities in mind, are leading in urban design, whereas the lifestyle, sense of community, identity, and health and well being of local populations have been largely undervalued. The guidelines will reflect the importance to consider environmental, social, economic and other components of the natural and built environments in ways that also take into account and result from the point of view of citizens. PHENOTYPE will complement the common quantitative approach by valorising the social/human functions of these environments, especially their contribution to promoting health and quality of life.

Following this broad and innovative approach, PHENOTYPE will formulate, test and validate a set of recommendations and guidelines concerning the desired characteristics of different types of natural environments in urban and rural areas, specifically their characteristic features, accessibility to them for different population groups, as well as their facilities, maintenance and services. By doing so, the work will overcome the existing applicability gap between information and knowledge accumulated by much research and policy definition and implementation.

1  
2  
3  
4  
5  
6 The guidelines for professional practitioners involved with spatial planning and health  
7 will consider three core topics in relation to each of the natural environment being  
8 considered:  
9

- 10 1. Qualitative characteristics of natural environments; recommendations concerning  
11 surface area, vegetation, water sources, ambient noise levels, views and  
12 microclimate;
- 13 2. Facilities, Maintenance and Services; recommendations about the kinds of  
14 communal facilities and services provided in each type of natural environment, as  
15 well as suggested levels of maintenance;
- 16 3. Accessibility Guidelines to Natural Environments; including requirements about  
17 access to different types of natural environments such as allotments,  
18 neighbourhood parks, children's playgrounds and nature reserves.

19 The baseline for the work is firstly the compilation and analysis of currently available  
20 information from existing databases and literature, and later new data collected by the  
21 project as described above. This will be complemented by the engagement with the  
22 appropriate stakeholders to assess scope for development. These insights will be  
23 combined into a conceptual framework on the underlying mechanisms of the effects of  
24 the natural environment on health and well-being.  
25  
26  
27  
28  
29  
30  
31  
32  
33

#### 34 *Stakeholders and dissemination*

35  
36  
37 The participation provides a forum for project assurance and benefits for PHENOTYPE  
38 are summarised as follows:  
39

- 40 - A more robust evidence base on links between exposure to natural outdoor  
41 environment and human health/well-being for various regions in Europe. Hereby  
42 we expect to develop a better understanding of the potential mechanisms.
- 43 - A better integration of human needs into land use planning and green space  
44 management in rural as well as urban areas. Furthermore, the application of  
45 these needs in practical guidelines.  
46  
47  
48  
49

50  
51 Stakeholder involvement is critical for bringing outside (policy) ideas into the research  
52 planning, to increase the usefulness of the research, and to assure a better  
53 implementation of the results of the project (Web Figure 5). In a research project, this is  
54  
55  
56

1  
2  
3  
4  
5  
6 often limited because the lack of interest of stakeholders and the limited resources and  
7 efforts of consortia.  
8

9  
10 From the start of PHENOTYPE actively sought to establish and maintain relations and  
11 dialogues with and between key stakeholders from local, regional and national health  
12 and environment authorities, institutions and the international research community.

13 These include policy makers, architects, urban planners, natural space managers, health  
14 professionals, and the international research community. This group is highly diverse,  
15 as we are looking at a range of professions within the subject areas of environment and  
16 health, from volunteers to scientists, community workers and policy developers.

17 PHENOTYPE has thus far been successful in its engagement activities, providing  
18 continuous opportunities for information exchange and collaborations. These contribute  
19 to strengthening networking between researchers, policy-makers and stakeholders in  
20 order to facilitate the transfer of scientific knowledge to policy development, to  
21 exchange ideas about best practice and to help identify emerging issues on the natural  
22 outdoor environment and its mechanisms to improve health.  
23  
24

25 The PHENOTYPE website [www.phenotype.eu](http://www.phenotype.eu) provides an overview of the project,  
26 progress, actualities, surveys and publications. The site has a sign up form for periodic  
27 newsletters through which all stakeholders are regularly informed. It guarantees  
28 continuous visibility, and provides a means for interested parties to respond to activities,  
29 or to contact us with invitations to attend workshops, etc. PHENOTYPE is also found  
30 on social media twitter (@greenhealth4eu) and LinkedIn. The PHENOTYPE databases  
31 and overall results will be exploitable by policy makers at national and international  
32 level in areas including urban planning and health.  
33  
34  
35  
36  
37  
38  
39  
40  
41  
42

## 43 44 45 **Conclusion**

46  
47  
48 The PHENOTYPE project is an FP7 collaborative action, funded by the EC to explore  
49 the mechanisms underlying positive short term and long term health effects for different  
50 population groups. PHENOTYPE applies conventional and new innovative high tech  
51 methods to characterize the natural environment in terms of quality and quantity.  
52 Preventive as well as therapeutic effects of contact with the natural environment will be  
53  
54  
55

1  
2  
3  
4  
5  
6 covered. The proposed work aims to address the limitations of some of the studies that  
7 have been published so far (Table 2). Furthermore it addresses implications for land-  
8 use planning and green space management. The project will produce a more robust  
9 evidence base on links between exposure to natural outdoor environment and human  
10 health and well-being. This in turn will contribute to improved integration of human  
11 health needs into land use planning and green space management in rural and urban  
12 areas.  
13  
14  
15  
16

17  
18 "No additional data available yet".  
19  
20  
21  
22  
23  
24  
25  
26  
27  
28  
29  
30  
31  
32  
33  
34  
35  
36  
37  
38  
39  
40  
41  
42  
43  
44  
45  
46  
47  
48  
49  
50  
51  
52  
53  
54  
55  
56  
57  
58  
59  
60



**Author statement**

Mark J Nieuwenhuijsen, Hanneke Kruize, Christopher Gidlow, Michael Jerrett, Jolanda Maas, Edmund Seto, Peter Jan van den Hazel, Roderick Lawrence, and Regina Grazuleviciene and wrote the original grant proposal on which the study design and paper is based. Mark J Nieuwenhuijsen drafted the version of the paper and received input from all the authors. All authors read and commented on the paper and agree with the final version.

**Acknowledgement**

This research is receiving funding from the European Community's Seventh Framework Programme (FP7/2007-2013) under grant agreement no: 282996

[ENV.2011.1.2.3-2] Positive effects of natural environment for human health and well-being] Duration 1 Jan 2012-31 Dec 2015

Ethics approval was obtained for all aspects of the study by the local ethics committees in the countries where the work was conducted, and sent to the European Commission before advancement of the study.

## References

(1) Takano, T., Nakamura, K., & Watanabe, M. (2002). [Urban residential environments and senior citizens' longevity in megacity areas: The importance of walkable green spaces.](#) *Journal of Epidemiological Community Health*, 56, 913–918.

(2) Mitchell, R., & Popham, F. (2008). [Effect of exposure to natural environment on health inequalities: An observational population study.](#) *The Lancet*, 372(9650), 1655–1660.

(3) Villeneuve PJ, Jerrett M, Su JG, Burnett R, Chen H, Wheeler AJ, Goldberg MS. [A cohort study relating urban green space with mortality in Ontario, Canada.](#) *Environ Res.* 2012 May;115:51-8

(4) Pereira G, Foster S, Martin K, Christian H, Boruff BJ, Knuiman M and Giles-Corti B. [The association between neighborhood greenness and cardiovascular disease: an observational study.](#) *BMC Public Health* 2012, 12:466

(5) de Vries, S., Verheij, R. A., Groenewegen, P. P., & Spreeuwenberg, P. (2003). [Natural environments – healthy environments? An exploratory analysis of the relationship between greenspace and health.](#) *Environment and Planning A*, 35, 1717–1731.

(6) Maas, J., Verheij, R. A., Groenewegen, P. P., de Vries, S., & Spreeuwenberg, P. (2006). [Green space, urbanity and health: How strong is the relation?](#) *Journal of Epidemiology and Community Health*, 60, 587–592.

(7) Grahn, P., & Stigsdotter, U. A. (2003). [Landscape planning and stress.](#) *Urban Forestry & Urban Greening*, 2(1), 1–18.

(8) Hartig, T., Evans, G. W., Jamner, L. D., Davies, D. S., & Gärling, T. (2003). [Tracking restoration in natural and urban field settings.](#) *Journal of Environmental Psychology*, 23, 109–123.

Formatted: Indent: Left: 0", First line: 0",  
Line spacing: 1.5 lines

Formatted: Indent: Left: 0", First line: 0",  
Line spacing: 1.5 lines

Formatted: Indent: Left: 0", First line: 0",  
Line spacing: 1.5 lines

Formatted: Indent: Left: 0", First line: 0",  
Line spacing: 1.5 lines

Formatted: Indent: Left: 0", First line: 0",  
Line spacing: 1.5 lines

Formatted: Indent: Left: 0", First line: 0",  
Line spacing: 1.5 lines

1  
2  
3  
4  
5  
6 (9) Maas, J., Verheij, R. A., de Vries, S., Spreeuwenberg, P., Groenewegen, P. P., &  
7 Schellevis, G. S. (2009b). Morbidity is related to a green living environment. *Journal of*  
8 *Epidemiology and Community Health*, 63, 967–973.

10  
11 (10) Ottosson, J., & Grahn, P. (2005). A comparison of leisure time spent in a garden  
12 with leisure time spent indoors: On measures of restoration in residents in geriatric care.  
13 *Landscape Research*, 30(1), 23–55.

16  
17 (11) Richardson, E. A., & Mitchell, R. (2010b). Gender differences in relationships  
18 between urban green space and health in the United Kingdom. *Social Science and*  
19 *Medicine*, 71(3), 568–575.

22  
23 (12) Astell-Burt T, Feng X, Kolt GS. Does access to neighbourhood green space  
24 promote a healthy duration of sleep? Novel findings from a cross-sectional study of 259  
25 319 Australians. *BMJ Open*. 2013a Aug 13;3(8). pii: e003094. doi: 10.1136/bmjopen-  
26 2013-003094.

29  
30 (13) Ulrich RS. Views through a Windows may influence recovery from surgery.  
31 *Science*. 1984 Apr 27;224(4647):420-1.

33  
34 (14) Kim, J., & Kaplan, R. (2004). Physical and psychological factors in sense of  
35 community – New urbanist Kentlands and nearby orchard village. *Environment*  
36 *Behavior*, 36, 313–334.

39  
40 (15) Sullivan, W. C., Kuo, F. E., & Depooter, S. F. (2004). The fruit of urban nature:  
41 Vital neighbourhood spaces. *Environment and Behavior*, 36, 678–700.

44  
45 (16) Kweon, B. S., Sullivan, W. C., & Wiley, A. (1998). Green common spaces and the  
46 social integration of inner-city older adults. *Environment and Behavior*, 30, 832–858.

49  
50 (17) Maas, J., van Dillen, S. M. E., Verheij, R. A., & Groenewegen, P. P. (2009a). Social  
51 contacts as a possible mechanism behind the relation between green space and health.  
52 *Health and Place*, 15(2), 586–595.

Formatted: Indent: Left: 0", First line: 0",  
Line spacing: 1.5 lines

Formatted: Indent: Left: 0", First line: 0",  
Line spacing: 1.5 lines

Formatted: Indent: Left: 0", First line: 0",  
Line spacing: 1.5 lines

Formatted: Indent: Left: 0", First line: 0",  
Line spacing: 1.5 lines

Formatted: Indent: Left: 0", First line: 0",  
Line spacing: 1.5 lines

Formatted: Indent: Left: 0", First line: 0",  
Line spacing: 1.5 lines

Formatted: Indent: Left: 0", First line: 0",  
Line spacing: 1.5 lines

Formatted: Indent: Left: 0", First line: 0",  
Line spacing: 1.5 lines

Formatted: Indent: Left: 0", First line: 0",  
Line spacing: 1.5 lines

(18) de Vries S, van Dillen SME, Groenewegen PP, Spreeuwenberg P. Streetscape greenery and health: Stress, social cohesion and physical activity as mediators. *Social Science & Medicine* 94 (2013) 26e33

(19) Donovan GH, Michael YL, Butry DT, Sullivan AD, Chase JM. Urban trees and the risk of poor birth outcomes. *Health & Place* 17 (2011) 390–393

(20) Dadvand P, de Nazelle A, Figueras F, Basagaña X, Sue J, Amoly E, et al. 2012a. Green space, health inequality and pregnancy. *Environ Int* 40:110-115.

(21) Dadvand P, Sunyer J, Basagaña X, Ballester F, Lertxundi A, Fernandez-Somoano A, et al. 2012b. Surrounding Greenness and Pregnancy Outcomes in Four Spanish Birth Cohorts. *Environmental health perspectives* 120(10):1481-1487.

(22) Mitchell, R., & Popham, F. (2007). Greenspace, urbanity and health: Relationships in England. *Journal of Epidemiology and Community Health*, 61, 681–683.

(23) Cohen DA, Ashwood JS, Scott MM, Overton A, Evenson KR, Staten LK, Porter D, McKenzie TL, Catellier D. Public parks and physical activity among adolescent girls. *Pediatrics* 2006 Nov;118(5):e1381-9

(24) Cohen, D.A., McKenzie, T.L., Sehgal, A., Williamson, S., Golinelli, D. & Lurie, N. (2007). Contribution of public parks to physical activity. *American Journal of Public Health*, 97:509-14.

(25) Coombes, E., Jones, A. P., & Hillsdon, M. (2010). The relationship of physical activity and overweight to objectively measured green space accessibility and use. *Social Science & Medicine*, 70(6), 816–822.

(26) Lachowycz, K., & Jones, A. P. (2011). Greenspace and obesity: a systematic review of the evidence. *Obesity Reviews*, 12(5), e183-e189. doi: 10.1111/j.1467-789X.2010.00827.x

Formatted: Indent: Left: 0", First line: 0", Line spacing: 1.5 lines

Formatted: English (U.S.)

Formatted: Spanish (International Sort)

Formatted: Indent: Left: 0", First line: 0", Line spacing: 1.5 lines

Formatted: Indent: Left: 0", First line: 0", Line spacing: 1.5 lines

(27) Toftager M, Ekholm O, Schipperijn J, Stigsdotter U, Bentsen P, Grønbæk M, Randrup TB, Kamper-Jørgensen F. Distance to green space and physical activity: a Danish national representative survey. *J Phys Act Health*. 2011 Aug;8(6):741-9.

(28) Rodríguez DA, Cho GH, Evenson KR, Conway TL, Cohen D, Ghosh-Dastidar B, Pickrel JL, Veblen-Mortenson S, Lytle LA. Out and about: association of the built environment with physical activity behaviors of adolescent females. *Health Place*. 2012 Jan;18(1):55-62.

(29) Mytton OT, Townsend N, Rutter H, Foster C. Green space and physical activity: an observational study using Health Survey for England data. *Health Place*. 2012 Sep;18(5):1034-41. doi: 10.1016/j.healthplace.2012.06.003. Epub 2012 Jun 17.

(30) Annerstedt M, Ostergren PO, Björk J, Grahn P, Skärbäck E, Währborg P. Green qualities in the neighbourhood and mental health - results from a longitudinal cohort study in Southern Sweden. *BMC Public Health*. 2012 May 8;12:337. doi: 10.1186/1471-2458-12-337.

(31) Almanza E, Jerrett M, Dunton G, Seto E, Pentz MA. A study of community design, greenness, and physical activity in children using satellite, GPS and accelerometer data. *Health Place*. 2012 Jan;18(1):46-54.

Astell-Burt T, Feng X, Kolt GS. Does access to neighbourhood green space promote a healthy duration of sleep? Novel findings from a cross-sectional study of 259 319 Australians. *BMJ Open*. 2013a Aug 13;3(8). pii: e003094. doi: 10.1136/bmjopen-2013-003094.

(32) Astell-Burt T, Feng X, Kolt GS. Green space is associated with walking and moderate-to-vigorous physical activity (MVPA) in middle-to-older-aged adults: findings from 203 883 Australians in the 45 and Up Study. *Br J Sports Med*. 2013b Apr 30. [Epub ahead of print]

Formatted: Spanish (International Sort)

Formatted ... [1]

Field Code Changed

Formatted ... [2]

Field Code Changed

Formatted ... [4]

Field Code Changed

Formatted ... [3]

Field Code Changed

Field Code Changed

Formatted ... [5]

Field Code Changed

Formatted ... [6]

Field Code Changed

Formatted ... [7]

Field Code Changed

Formatted ... [8]

Formatted: Indent: Left: 0", First line: 0", Line spacing: 1.5 lines

Formatted: Indent: Left: 0", First line: 0", Line spacing: 1.5 lines

Formatted: Indent: Left: 0", First line: 0", Line spacing: 1.5 lines

Formatted: Spanish (International Sort)

Field Code Changed

Formatted ... [9]

Field Code Changed

Formatted ... [10]

Field Code Changed

Formatted ... [11]

Field Code Changed

Formatted ... [12]

Field Code Changed

Formatted ... [13]

Field Code Changed

Formatted ... [14]

Formatted: Line spacing: 1.5 lines

Formatted ... [15]

Field Code Changed

Formatted ... [16]

1  
2  
3  
4  
5  
6  
7  
8  
9  
10  
11  
12  
13  
14  
15  
16  
17  
18  
19  
20  
21  
22  
23  
24  
25  
26  
27  
28  
29  
30  
31  
32  
33  
34  
35  
36  
37  
38  
39  
40  
41  
42  
43  
44  
45  
46  
47  
48  
49  
50  
51  
52  
53  
54  
55  
56  
57  
58  
59  
60

(33) Richardson EA, Pearce J, Mitchell R, Kingham S. Role of physical activity in the relationship between urban green space and health. *Public Health*. 2013 Apr;127(4):318-24. doi: 10.1016/j.puhe.2013.01.004. Epub 2013 Apr 12.

Formatted: Line spacing: 1.5 lines

(34) Ellaway E, Macintyre S, Bonnefoy X. Graffiti, greenery, and obesity in adults: secondary analysis of European cross sectional survey. *BMJ* 2005 17;331(7517):611-2

Formatted: Line spacing: 1.5 lines

(35) Wolch J, Jerrett M, Reynolds K, McConnell R, Chang R, Dahmann N, Brady K, Gilliland F, Su JG, Berhane K. Childhood obesity and proximity to urban parks and recreational resources: A longitudinal cohort study. *Health & Place* 17 (2011) 207–214

Formatted: Line spacing: 1.5 lines

(36) Pereira G, Christian H, Foster S, Boruff BJ, Bull F, Knuiaman M, Giles-Corti B. The association between neighborhood greenness and weight status: An observational study in Perth Western Australia. *Environmental Health* 2013, 12:49 (19 June 2013)

Formatted: English (U.S.)

Formatted: Line spacing: 1.5 lines

(37) Astell-Burt T, Feng X, Kolt GS. Greener neighborhoods, slimmer people? Evidence from 246 920 Australians. *Int J Obes (Lond)*. 2013c May 3. doi: 10.1038/ijo.2013.64. [Epub ahead of print]

(38) Lovasi GS, Schwartz-Soicher O, Quinn JW, Berger DK, Neckerman KM, Jaslow R, Lee KK, Rundle A. Neighborhood safety and green space as predictors of obesity among preschool children from low-income families in New York City. *Prev Med*. 2013 May 31. pii: S0091-7435(13)00175-8. doi: 10.1016/j.ypmed.2013.05.012. [Epub ahead of print]

Formatted: English (U.S.)

Formatted: Line spacing: 1.5 lines

(39) Bodin, M. & Hartig, T. (2003). Does the outdoor environment matter for psychological restoration gained through running? *Psychology of Sport and Exercise*, 4:141-153

(40) Pretty, J., Peacock, J., Sellens, M. & Griffin, M. (2005). The mental and physical health outcomes of green exercise. *International Journal of Environmental Health Research*, 15(5):319-337.

- 1  
2  
3  
4  
5  
6  
7  
8  
9  
10  
11  
12  
13  
14  
15  
16  
17  
18  
19  
20  
21  
22  
23  
24  
25  
26  
27  
28  
29  
30  
31  
32  
33  
34  
35  
36  
37  
38  
39  
40  
41  
42  
43  
44  
45  
46  
47  
48  
49  
50  
51  
52  
53  
54  
55  
56  
57  
58  
59  
60
- (41) [Bowler DE, Buyung-Ali LM, Knight TM, Pullin AS. A systematic review of evidence for the added benefits to health of exposure to natural environments. BMC Public Health 2010, 10:456](#)
- (42) [Thompson Coon, J., Boddy, K., Stein, K., Whear, R., Barton, J., & Depledge, M. H. \(2011\). Does Participating in Physical Activity in Outdoor Natural Environments Have a Greater Effect on Physical and Mental Wellbeing than Physical Activity Indoors? A Systematic Review. \*Environmental Science & Technology\*, 45\(5\), 1761-1772. doi: 10.1021/es102947t](#)
- (43) [Kaplan, R., & Kaplan, S. \(1989\). \*The experience of nature: A psychological perspective\*. New York: Cambridge University Press.](#)
- (44) [van den Berg, A. E., Koole, S. L., & van der Wulp, N. Y. \(2003\). Environmental preference and restoration: \(How\) are they related? \*Journal of Environmental Psychology\*, 23\(2\), 135–146.](#)
- (45) [van den Berg, A., & Custers, M. H. G. \(2011\). Gardening promotes neuroendocrine and affective restoration from stress. \*Journal of Health Psychology\*, 16\(1\), 3–11.](#)
- (46) [Ulrich, R. S., Simons, R. F., Losito, B. D., Fiorito, E., Miles, M. A., & Zelson, M. \(1991\). Stress recovery during exposure to natural and urban environments. \*Journal of Environmental Psychology\*, 11, 201–230.](#)
- (47) [Stigsdotter UK, Ekholm O, Schipperijn J, Toftager M, Kamper-jørgensen F and Randrup TB. Health promoting outdoor environments – associations between green space, and health, health-related quality of life and stress based on a Danish national representative survey. \*Scandinavian Journal of Public Health\*, 2010; 0: 1–7](#)
- (48) [Faber Taylor, A., Kuo, F. E., & Sullivan, W. \(2002\). Views of nature and self discipline: Evidence from inner city children. \*Journal of Environmental Psychology\*, 22, 49–63.](#)
- (49) [Kuo, F. E., & Sullivan, W. C. \(2001a\). Aggression and violence in the inner city:](#)



1  
2  
3  
4  
5  
6 [Effects of environment on mental fatigue. \*Environment and Behavior\*, 33\(4\), 543–571.](#)

7  
8  
9 [\(50\) Kuo, F. E., & Sullivan, W. C. \(2001b\). \*Environment and crime in the inner city: Effects of environment via mental fatigue. \*Environment and Behavior\*, 33\(3\), 343–367.\*](#)

Formatted: English (U.S.)

10  
11  
12  
13 [\(51\) Wolfe MK, Jeremy Mennis J. Does vegetation encourage or suppress urban crime? Evidence from Philadelphia, PA. \*Landscape and Urban Planning\* 108 \(2012\) 112– 122](#)

14  
15  
16  
17 [\(52\) Kuo FE, Sullivan WC, Wiley A. Fertile ground for community: inner-city neighborhood common spaces. \*Am J Community Psychol\*, 1998a; 26:823-51](#)

Formatted: English (U.S.)

18  
19  
20  
21  
22 [\(53\) Dadvand P, de Nazelle A, Triguero-Mas M, Schembari A, Cirach M, Amoly E, Figueras F, Basagaña X, Ostro B, Nieuwenhuijsen M. Surrounding Greenness and Exposure to Air Pollution During Pregnancy: An Analysis of Personal Monitoring Data. \*Environ Health Perspect\*. 2012c;120\(9\):1286-90](#)

Field Code Changed

23  
24  
25  
26  
27  
28 [\(54\) Baldauf R, Watkins N, Heist D, Bailey C, Rowley P, Shores R. 2009. Near-road air quality monitoring: Factors affecting network design and interpretation of data. \*Air Qual Atmos Health\* 2\(1\):1-9.](#)

Formatted: Indent: Left: 0", First line: 0", Line spacing: 1.5 lines

29  
30  
31  
32  
33  
34 [\(55\) Su JG, Jerrett M, de Nazelle A, Wolch J. Does exposure to air pollution in urban parks have socioeconomic, racial or ethnic gradients? \*Environ Res\*. 2011 Apr;111\(3\):319-28.](#)

Formatted: Indent: Left: 0", First line: 0", Line spacing: 1.5 lines

35  
36  
37  
38  
39  
40 [\(56\) Park M, Hagishima A, Tanimoto J, Narita K-i. 2012a. Effect of urban vegetation on outdoor thermal environment: Field measurement at a scale model site. \*Building and Environment\* 56:38-46.](#)

41  
42  
43  
44  
45  
46 [\(57\) Park M, Hagishima A, Tanimoto J, Narita K-i. 2012b. Effect of urban vegetation on outdoor thermal environment: Field measurement at a scale model site. \*Building and Environment\* 56:38-46.](#)

Formatted: Indent: Left: 0", First line: 0", Line spacing: 1.5 lines

47  
48  
49  
50  
51  
52 [\(58\) Aylor DE, \*Noise reduction by vegetation and ground. J Acoust Soc Am\*, 1972. 51:](#)  
53  
54  
55 p.

1  
2  
3  
4  
5  
6 197-205.  
7

8  
9 [\(59\) Fan Y, Zhiyi B, Zhujun Z, and Jiani L, \*The investigation of noise attenuation by plants and the corresponding noise-reducing spectrum\*. J Environ Health, 2010. \*\*72\*\*: p. 8-15.](#)  
10  
11  
12

13  
14 [\(60\) Fang CF and Ling DL, \*Investigation of the noise reduction provided by tree belts\*. Landscape Urban Plan, 2003. \*\*63\*\*: p. 187-195.](#)  
15  
16  
17

18  
19 [\(61\) Fang CF and Ling DL, \*Guidance for noise reduction provided by tree belts\*. Landscape Urban Plan, 2005. \*\*71\*\*: p. 29-34.](#)  
20  
21  
22

23  
24 [\(62\) Samara T and Tsitsoni T, \*Road traffic noise reduction by vegetation in the city ring road of a big city\*, in \*Proceedings of the International Conference on Environmental Management, Engineering, Planning and Economics\*, Kungolos A, Aravossis K, Karagiannidis A, and Samaras P, Editors. 2007: Skiathos. p. 2591-2596.](#)  
25  
26  
27  
28  
29

30  
31 [\(63\) Zhang M and Kang J, \*Towards the evaluation, description, and creation of soundscapes in urban open spaces\*. Environ Plann B, 2007. \*\*34\*\*: p. 68-86.](#)  
32  
33  
34

35  
36 [\(64\) Völker S, Kistemann T. \*The impact of blue space on human health and well-being - Salutogenetic health effects of inland surface waters: a review\*. Int J Hyg Environ Health. 2011 Nov;214\(6\):449-60.](#)  
37  
38  
39

40  
41 [\(65\) Völker S and Kistemann T. "I'm always entirely happy when I'm here!" Urban blue enhancing human health and well-being in Cologne and Düsseldorf, Germany. Social Science & Medicine 2013 Feb;78:113-24](#)  
42  
43  
44  
45

46  
47 [\(66\) White MP, Alcock I, Wheeler BW, Depledge MH. \*Coastal proximity, health and well-being: Results from a longitudinal panel survey\*. Health Place. 2013 Sep;23:97-103.](#)  
48  
49  
50  
51

52  
53 [\(67\) Schwanen T, Dijst M, Dieleman FM. 2002. \*A microlevel analysis of residential context and travel time\*. Environ Plan A 34\(8\):1487-1508.](#)  
54  
55  
56

Formatted: Indent: Left: 0", First line: 0",  
Line spacing: 1.5 lines

Formatted: Indent: Left: 0", First line: 0",  
Line spacing: 1.5 lines

Formatted: Indent: Left: 0", First line: 0",  
Line spacing: 1.5 lines

(68) [Maas J. 2008. Vitamin G: Green environments-Healthy environments. Utrecht: Nivel.](#)

(69) [EEA 2005, European Environment Agency, CORINE land cover 2000 \(CLC2000\) 100 m - version 8/2005 version 2, Copenhagen.](#)

(70) [EEA 2010, European Environment Agency. Urban Atlas 2010. <http://www.eea.europa.eu/data-and-maps/data/urban-atlas/>. Created : Apr 13, 2010 Published : May 28, 2010 Last modified : Apr 17, 2013](#)

(71) [Weier J, Herring D. Measuring vegetation \(NDVI & EVI\). <http://earthobservatory.nasa.gov/Features/MeasuringVegetation/:NASA2011>. Accessed in January 2011](#)

(72) [Dillen SME van, Vries S de, Groenewegen PP, Spreeuwenberg P. Greenspace in urban neighbourhoods and residents' health: adding quality to quantity. \*J Epidemiol Community Health\* 2012. 66:e8. doi:10.1136/jech.2009.104695](#)

(73) [Leidemeijer K, Marsman G, Reijden H van der, Grieken P van. Tussen woning en wijk. Een straattypologie voor Nederland. Amsterdam: RIGO, 2002.](#)

(74) [Lenthe F van, Huisman M, Kamphuis C, Giskens K, Brug J, Mackenbach J. Een beoordelingsinstrument van de fysieke en sociale buurtkenmerken die gezondheid stimuleren dan wel belemmeren. Eindverslag van een project gefinancierd door het Fonds Openbare Gezondheidszorg \(OZG\). Rotterdam: Erasmus MC, 2006.](#)

(75) [Gidlow CJ, Ellis NJ, Bostock S. Development of the Neighbourhood Green Space Tool \(NGST\) \*Landscape and Urban Planning\* 106 \(2012\) 347– 358](#)

(76) [Donaire-Gonzalez D, de Nazelle A, Seto E, Mendez M, Rodriguez D, Mark Nieuwenhuijsen M, and Jerrett M. Comparison of physical activity measures using smartphone based CalFit and Actigraph. \*J Med Internet Res\* 2013](#)

Formatted: Indent: Left: 0", First line: 0",  
Line spacing: 1.5 lines

Formatted: Indent: Left: 0", First line: 0",  
Line spacing: 1.5 lines

Formatted: Indent: Left: 0", First line: 0",  
Line spacing: 1.5 lines

Formatted: English (U.S.)

Formatted: Indent: Left: 0", First line: 0",  
Line spacing: 1.5 lines

Formatted: English (U.S.)

[Baldauf R, Watkins N, Heist D, Bailey C, Rowley P, Shores R. 2009. Near road air quality monitoring: Factors affecting network design and interpretation of data. \*Air Qual Atmos Health\* 2\(1\):1-9.](#)

Formatted: Line spacing: 1.5 lines

[\(77\) de Nazelle A, Seto E, Donaire-Gonzalez D, Mendez M, Matamala J, Rodriguez D, Nieuwenhuijsen MJ, and Jerrett M. Improving estimates of air pollution exposure through ubiquitous sensing technologies. \*Environ Pol\* 2013; 176: 92-99](#)

[\(78\) Shiffman S, Stone AA, Hufford MR. Ecological momentary assessment. \*Annu Rev Clin Psychol\*. 2008;4:1-32](#)

Formatted: Space After: 0 pt, Line spacing: 1.5 lines, Don't adjust space between Latin and Asian text, Don't adjust space between Asian text and numbers

[Bodin, M. & Hartig, T. \(2003\). Does the outdoor environment matter for psychological restoration gained through running? \*Psychology of Sport and Exercise\*, 4:141-153](#)

Formatted: Line spacing: 1.5 lines

[Bowler DE, Buyung-Ali LM, Knight TM, Pullin AS. A systematic review of evidence for the added benefits to health of exposure to natural environments. \*BMC Public Health\* 2010; 10:456](#)

Formatted: Line spacing: 1.5 lines, Don't adjust space between Latin and Asian text, Don't adjust space between Asian text and numbers

[\(79\) Burney PG, Luczynska C, Chinn S, Jarvis D. The European Community Respiratory Health Survey. \*Eur Respir J\* 1994; May;7\(5\):954-60.](#)

Formatted: Space After: 0 pt, Line spacing: 1.5 lines, Don't adjust space between Latin and Asian text, Don't adjust space between Asian text and numbers

Formatted: Line spacing: 1.5 lines

[\(80\) Wright J, Small N, Raynor P, Tuffnell D, Bhopal R, Cameron N, Fairley L, Lawlor DA, Parslow R, Petherick ES, Pickett KE, Waiblinger D, and West J. on behalf of the Born in Bradford Scientific Collaborators Group. Cohort profile: The Born in Bradford multi-ethnic family cohort study. \*International Journal of Epidemiology\* 2012;1-14 doi:10.1093/ije/dys112](#)

Formatted: Line spacing: 1.5 lines

[Cohen DA, Ashwood JS, Scott MM, Overton A, Evenson KR, Staten LK, Porter D, McKenzie TL, Catellier D. Public parks and physical activity among adolescent girls. \*Pediatrics\*. 2006 Nov;118\(5\):e1381-9](#)

Formatted: Space Before: 0 pt, After: 0 pt, Line spacing: 1.5 lines

[Cohen, D.A., McKenzie, T.L., Sehgal, A., Williamson, S., Golinelli, D. & Lurie, N. \(2007\). Contribution of public parks to physical activity. \*American Journal of Public Health\*, 97:509-14.](#)

Formatted: Space After: 0 pt, Line spacing: 1.5 lines

[Coombes, E., Jones, A. P., & Hillsdon, M. \(2010\). The relationship of physical activity](#)

Formatted: Line spacing: 1.5 lines

1  
2  
3  
4  
5  
6 and overweight to objectively measured green space accessibility and use. *Social*  
7 *Science & Medicine*, 70(6), 816–822.

Formatted: Spanish (International Sort)

8  
9  
10 Dadvand P, de Nazelle A, Figueras F, Basagaña X, Sue J, Amoly E, et al. 2012a. Green  
11 space, health inequality and pregnancy. *Environ Int* 40:110–115.

12  
13  
14 Dadvand P, Sunyer J, Basagaña X, Ballester F, Lertxundi A, Fernández-Somoano A,  
15 et al. 2012b. Surrounding Greenness and Pregnancy Outcomes in Four Spanish Birth  
16 Cohorts. *Environmental health perspectives* 120(10):1481–1487.

17  
18  
19 Dadvand P, de Nazelle A, Triguero-Mas M, Schembari A, Cirach M, Amoly E,  
20 Figueras F, Basagaña X, Ostro B, Nieuwenhuijsen M. Surrounding Greenness and  
21 Exposure to Air Pollution During Pregnancy: An Analysis of Personal Monitoring Data.  
22 *Environ Health Perspect*. 2012c;120(9):1286–90

23  
24  
25 de Nazelle A, Seto E, Donaire-Gonzalez D, Mendez M, Matamala J, Rodriguez D,  
26 Nieuwenhuijsen MJ, and Jerrett M. Improving estimates of air pollution exposure  
27 through ubiquitous sensing technologies. *Environ Pol* 2013; 176: 92–99

28  
29  
30 Dillen-SME van, Vries S de, Groenewegen PP, Spreeuwenberg P. Greenspace in urban  
31 neighbourhoods and residents' health: adding quality to quantity. *J Epidemiol*  
32 *Community Health* 2012; 66:e8. doi:10.1136/jech.2009.104695

33  
34  
35 Donaire-Gonzalez D, de Nazelle A, Seto E, Mendez M, Rodriguez D, Mark  
36 Nieuwenhuijsen M, and Jerrett M. Comparison of physical activity measures using  
37 smartphone-based CalFit and Actigraph. *J Med Internet Res* 2013

38  
39  
40 Donovan GH, Michael YL, Butry DT, Sullivan AD, Chase JM. Urban trees and the risk  
41 of poor birth outcomes. *Health & Place* 17 (2011) 390–393

42  
43  
44 de Vries, S., Verheij, R. A., Groenewegen, P. P., & Spreeuwenberg, P. (2003). Natural  
45 environments—healthy environments? An exploratory analysis of the  
46 relationship between greenspace and health. *Environment and Planning A*, 35,  
47 1717–1731.

de Vries S, van Dillen SME, Groenewegen PP, Spreeuwenberg P. Streetscape greenery and health: Stress, social cohesion and physical activity as mediators. *Social Science & Medicine* 94 (2013) 26e33

EEA 2005, European Environment Agency, *CORINE land cover 2000 (CLC2000) 100 m - version 8/2005 version 2*, Copenhagen.

EEA 2010, European Environment Agency. Urban Atlas 2010. <http://www.eea.europa.eu/data-and-maps/data/urban-atlas/>. Created : Apr 13, 2010 Published : May 28, 2010 Last modified : Apr 17, 2013

Ellaway E, Macintyre S, Bonnefoy X. Graffiti, greenery, and obesity in adults: secondary analysis of European cross-sectional survey. *BMJ* 2005 17;331(7517):611-2

Faber Taylor, A., Kuo, F. E., & Sullivan, W. (2002). Views of nature and self discipline: Evidence from inner city children. *Journal of Environmental Psychology*, 22, 49-63.

Fang CF and Ling DL, *Guidance for noise reduction provided by tree belts*. *Landscape Urban Plan*, 2005. 71: p. 29-34.

Fang CF and Ling DL, *Investigation of the noise reduction provided by tree belts*. *Landscape Urban Plan*, 2003. 63: p. 187-195.

Fan Y, Zhiyi B, Zhujun Z, and Jiani L, *The investigation of noise attenuation by plants and the corresponding noise-reducing spectrum*. *J Environ Health*, 2010. 72: p. 8-15.

Gidlow CJ, Ellis NJ, Bostock S. Development of the Neighbourhood Green Space Tool (NGST) *Landscape and Urban Planning* 106 (2012) 347-358

Grahn, P., & Stigsdotter, U. A. (2003). Landscape planning and stress. *Urban Forestry & Urban Greening*, 2(1), 1-18.

Formatted: Indent: Left: 0", First line: 0", Line spacing: 1.5 lines

Formatted: Line spacing: 1.5 lines

Formatted: Indent: Left: 0", First line: 0", Line spacing: 1.5 lines

Formatted: Line spacing: 1.5 lines

1  
2  
3  
4  
5  
6 Hartig, T., Evans, G. W., Jamner, L. D., Davies, D. S., & Gärling, T. (2003). Tracking  
7 restoration in natural and urban field settings. *Journal of Environmental Psychology*,  
8 23, 109–123.

9  
10  
11  
12 Hartig, T., Mang, M., & Evans, G. W. (1991). Restorative effects of natural environment  
13 experience. *Environment and Behavior*, 23, 3–26.

14  
15  
16 Kaplan, R., & Kaplan, S. (1989). *The experience of nature: A psychological*  
17 *perspective*. New York: Cambridge University Press.

18  
19  
20  
21 Kim, J., & Kaplan, R. (2004). Physical and psychological factors in sense of community  
22 —New urbanist Kentlands and nearby orchard village. *Environment Behavior*, 36,  
23 313–334.

24  
25  
26  
27 Kuo, F. E., & Sullivan, W. C. (2001a). Aggression and violence in the inner city:  
28 Effects of environment on mental fatigue. *Environment and Behavior*, 33(4),  
29 543–571.

Formatted: Spanish (International Sort)

30  
31  
32  
33 Kuo, F. E., & Sullivan, W. C. (2001b). Environment and crime in the inner city:  
34 Effects of environment via mental fatigue. *Environment and Behavior*, 33(3),  
35 343–367.

Formatted: Spanish (International Sort)

36  
37  
38  
39 Kuo FE, Sullivan WC, Wiley A. Fertile ground for community: inner-city  
40 neighborhood common spaces. *Am J Community Psychol*, 1998a; 26:823–51

41  
42  
43 Kweon, B. S., Sullivan, W. C., & Wiley, A. (1998). Green common spaces and the  
44 social integration of inner-city older adults. *Environment and Behavior*, 30, 832–858.

45  
46  
47 Lachowycz, K., & Jones, A. P. (2011). Greenspace and obesity: a systematic review of  
48 the evidence. *Obesity Reviews*, 12(5), e183–e189. doi: 10.1111/j.1467-  
49 789X.2010.00827.x

Formatted: Spanish (International Sort)

1  
2  
3  
4  
5  
6 [\(81\)](#) Lawrence, RJ (2001) Human Ecology. IN: M. Tolba (ed.), *Our Fragile World: Challenges and opportunities for sustainable development, Volume 1*. EOLSS Publishers, Oxford, 2001, pp.675-693

Formatted: Space After: 0 pt, Line spacing: 1.5 lines

11 ~~[Leidemeijer K, Marsman G, Reijden H van der, Grieken P van. Tussen woning en wijk. Een straattypologie voor Nederland. Amsterdam: RIGO, 2002.](#)~~

Formatted: Line spacing: 1.5 lines

16 ~~[Lenthe F van, Huisman M, Kamphuis C, Giskens K, Brug J, Mackenbach J. Een beoordelingsinstrument van de fysieke en sociale buurtkenmerken die gezondheid stimuleren dan wel belemmeren. Eindverslag van een project gefinancierd door het Fonds Openbare Gezondheidszorg \(OZG\). Rotterdam: Erasmus MC, 2006.](#)~~

24 ~~[Lovasi GS, Schwartz Soicher O, Quinn JW, Berger DK, Neckerman KM, Jaslow R, Lee KK, Rundle A. Neighborhood safety and green space as predictors of obesity among preschool children from low income families in New York City. Prev Med. 2013 May 31. pii: S0091-7435\(13\)00175-8. doi: 10.1016/j.ypmed.2013.05.012. \[Epub ahead of print\]](#)~~

33 ~~[Maas, J., van Dillen, S. M. E., Verheij, R. A., & Groenewegen, P. P. \(2009a\). Social contacts as a possible mechanism behind the relation between green space and health. Health and Place, 15\(2\), 586–595.](#)~~

38 ~~[Maas, J., Verheij, R. A., de Vries, S., Spreeuwenberg, P., Groenewegen, P. P., & Schellevis, G. S. \(2009b\). Morbidity is related to a green living environment. Journal of Epidemiology and Community Health, 63, 967–973.](#)~~

44 ~~[Maas, J., Verheij, R. A., Groenewegen, P. P., de Vries, S., & Spreeuwenberg, P. \(2006\). Green space, urbanity and health: How strong is the relation? Journal of Epidemiology and Community Health, 60, 587–592.](#)~~

50 ~~[Maas J. 2008. Vitamin G: Green environments Healthy environments. Utrecht: Nivel.](#)~~

53 ~~[Mitchell, R., & Popham, F. \(2007\). Greenspace, urbanity and health: Relationships in England. Journal of Epidemiology and Community Health, 61, 681–683.](#)~~



Mitchell, R., & Popham, F. (2008). Effect of exposure to natural environment on health inequalities: An observational population study. *The Lancet*, 372(9650), 1655–1660.

Mytton OT, Townsend N, Rutter H, Foster C. Green space and physical activity: an observational study using Health Survey for England data. *Health Place*. 2012 Sep;18(5):1034–41. doi: 10.1016/j.healthplace.2012.06.003. Epub 2012 Jun 17.

Nilsson K, Sangster M, Gallis C, Hartig T, de Vries S, Seeland K, et al. 2011. *Forests, Trees and Human Health*. New York: Springer.

Ottosson, J., & Grahn, P. (2005). A comparison of leisure time spent in a garden with leisure time spent indoors: On measures of restoration in residents in geriatric care. *Landscape Research*, 30(1), 23–55.

Park M, Hagishima A, Tanimoto J, Narita K i. 2012a. Effect of urban vegetation on outdoor thermal environment: Field measurement at a scale model site. *Building and Environment* 56:38–46.

Park M, Hagishima A, Tanimoto J, Narita K i. 2012b. Effect of urban vegetation on outdoor thermal environment: Field measurement at a scale model site. *Building and Environment* 56:38–46.

Pereira G, Christian H, Foster S, Boruff BJ, Bull F, Knuiman M, Giles Corti B. The association between neighborhood greenness and weight status: An observational study in Perth Western Australia. *Environmental Health* 2013, 12:49 (19 June 2013)

Pereira G, Foster S, Martin K, Christian H, Boruff BJ, Knuiman M and Giles Corti B. The association between neighborhood greenness and cardiovascular disease: an observational study. *BMC Public Health* 2012, 12:466

Pretty, J., Peacock, J., Sellens, M. & Griffin, M. (2005). The mental and physical health outcomes of green exercise. *International Journal of Environmental Health Research*, 15(5):319–337.

Formatted: Indent: Left: 0", First line: 0", Line spacing: 1.5 lines

Formatted: Space After: 0 pt, Line spacing: 1.5 lines

Formatted: Line spacing: 1.5 lines

Formatted: Space After: 0 pt, Line spacing: 1.5 lines

Richardson, E. A., & Mitchell, R. (2010b). Gender differences in relationships between urban green space and health in the United Kingdom. *Social Science and Medicine*, 71(3), 568–575.

Richardson EA, Pearce J, Mitchell R, Kingham S. Role of physical activity in the relationship between urban green space and health. *Public Health*. 2013 Apr;127(4):318–24. doi: 10.1016/j.puhe.2013.01.004. Epub 2013 Apr 12.

Rodríguez DA, Cho GH, Evenson KR, Conway TL, Cohen D, Ghosh-Dastidar B, Piekrel JL, Veblen-Mortenson S, Lytle LA. Out and about: association of the built environment with physical activity behaviors of adolescent females. *Health Place*. 2012 Jan;18(1):55–62.

Samara T and Tsitsoni T, *Road traffic noise reduction by vegetation in the city ring road of a big city*, in *Proceedings of the International Conference on Environmental Management, Engineering, Planning and Economics*, Kungolos A, Aravossis K, Karagiannidis A, and Samaras P, Editors. 2007; Skiathos. p. 2591–2596.

Scottish Executive. (2003). Let's make Scotland more active: A strategy for physical activity. Edinburgh: Physical Activity Task Force.

Schwanen T, Dijst M, Dieleman FM. 2002. A microlevel analysis of residential context and travel time. *Environ Plan A* 34(8):1487–1508.

Schwarz, N. Retrospective and concurrent self-reports: The rationale for real-time data capture. In: Stone A, Shiffman S, Atienza AA, Nebeling L, eds. *The Science of Real-Time Data Capture*. Oxford University Press: New York; 2007: 11–26.

Shiffman S, Stone AA, Hufford MR. Ecological momentary assessment. *Annu Rev Clin Psychol*. 2008;4:1–32

Sullivan, W. C., Kuo, F. E., & Depooter, S. F. (2004). The fruit of urban nature: Vital neighbourhood spaces. *Environment and Behavior*, 36, 678–700.

Stigsdottir UK, Ekholm O, Schipperijn J, Toftager M, Kamper-Jørgensen F and Randsdrup TB. Health promoting outdoor environments—associations between green

Formatted: Line spacing: 1.5 lines

Formatted: Space Before: 0 pt, After: 0 pt, Line spacing: 1.5 lines

Formatted: Line spacing: 1.5 lines

Formatted: Space After: 0 pt, Line spacing: 1.5 lines

Formatted: Line spacing: 1.5 lines

1  
2  
3  
4  
5  
6 space, and health, health related quality of life and stress based on a Danish national  
7 representative survey. *Scandinavian Journal of Public Health*, 2010; 0: 1–7

8  
9  
10 Su JG, Jerrett M, de Nazelle A, Wolch J. Does exposure to air pollution in urban parks  
11 have socioeconomic, racial or ethnic gradients? *Environ Res*. 2011 Apr;111(3):319–28.

12  
13  
14  
15 Takano, T., Nakamura, K., & Watanabe, M. (2002). Urban residential environments  
16 and senior citizens' longevity in megacity areas: The importance of walkable  
17 green spaces. *Journal of Epidemiological Community Health*, 56, 913–918.

18  
19  
20  
21 Thompson Coon, J., Boddy, K., Stein, K., Whear, R., Barton, J., & Depledge, M. H.  
22 (2011). Does Participating in Physical Activity in Outdoor Natural Environments Have  
23 a Greater Effect on Physical and Mental Wellbeing than Physical Activity Indoors? A  
24 Systematic Review. *Environmental Science & Technology*, 45(5), 1761–1772. doi:  
25 10.1021/es102947t

26  
27  
28  
29 Toftager M, Ekholm O, Schipperijn J, Stigsdotter U, Bentsen P, Grønbaek M, Randrup  
30 TB, Kamper-Jørgensen F. Distance to green space and physical activity: a Danish  
31 national representative survey. *J Phys Act Health*. 2011 Aug;8(6):741–9.

32  
33  
34  
35 Ulrich RS. Views through a Windows may influence recovery from surgery. *Science*.  
36 1984 Apr 27;224(4647):420–1.

37  
38  
39  
40 Ulrich, R. S., Simons, R. F., Losito, B. D., Fiorito, E., Miles, M. A., & Zelson, M.  
41 (1991). Stress recovery during exposure to natural and urban environments. *Journal of*  
42 *Environmental Psychology*, 11, 201–230.

43  
44  
45  
46 van den Berg, A., & Custers, M. H. G. (2011). Gardening promotes neuroendocrine  
47 and affective restoration from stress. *Journal of Health Psychology*, 16(1), 3–11.

48  
49  
50  
51 van den Berg, A. E., Koole, S. L., & van der Wulp, N. Y. (2003). Environmental  
52 preference and restoration: (How) are they related? *Journal of Environmental*  
53 *Psychology*, 23(2), 135–146.

Formatted: Spanish (International Sort)

1  
2  
3  
4  
5  
6  
7  
8 van den Berg, A., Maas, J., Verheij, R. A., & Groenewegen, P. P. (2010). Green space  
9 as a buffer between negative life events and health. *Social Science & Medicine*,  
10 70(8), 1203–1210.  
11

12  
13 Villeneuve PJ, Jerrett M, Su JG, Burnett R, Chen H, Wheeler AJ, Goldberg MS. A  
14 cohort study relating urban green space with mortality in Ontario, Canada. *Environ*  
15 *Res*. 2012 May;115:51-8  
16

17  
18 Völker S and Kistemann T. “I’m always entirely happy when I’m here!” Urban blue  
19 enhancing human health and well-being in Cologne and Düsseldorf, Germany. *Social*  
20 *Science & Medicine* 2013 Feb;78:113-24  
21

22  
23 Völker S, Kistemann T. The impact of blue space on human health and well-being—  
24 Salutogenetic health effects of inland surface waters: a review. *Int J Hyg*  
25 *Environ Health*. 2011 Nov;214(6):449-60.  
26

27  
28 Weier J, Herring D. Measuring vegetation (NDVI & EVI).  
29 [gov/Features/MeasuringVegetation/:NASA2011](http://gov/Features/MeasuringVegetation/:NASA2011). Accessed in January 2011  
30

31  
32 White MP, Alcock I, Wheeler BW, Depledge MH. Coastal proximity, health and well-  
33 being: Results from a longitudinal panel survey. *Health Place*. 2013 Sep;23:97-103.  
34

35  
36 Wolch J, Jerrett M, Reynolds K, McConnell R, Chang R, Dahmann N, Brady K,  
37 Gilliland F, Su JG, Berhane K. Childhood obesity and proximity to urban parks and  
38 recreational resources: A longitudinal cohort study. *Health & Place* 17 (2011) 207–214  
39

40  
41 Wolfe MK, Jeremy Mennis J. Does vegetation encourage or suppress urban crime?  
42 Evidence from Philadelphia, PA. *Landscape and Urban Planning* 108 (2012) 112–122  
43

44  
45 Wright J, Small N, Raynor P, Tuffnell D, Bhopal R, Cameron N, Fairley L, Lawlor DA,  
46 Parslow R, Petherick ES, Pickett KE, Waiblinger D, and West J. on behalf of the Born  
47 in Bradford Scientific Collaborators Group. Cohort profile: The Born in Bradford multi-  
48  
49  
50  
51  
52  
53  
54

ethnic family cohort study. *International Journal of Epidemiology* 2012; 41: 1-14  
 doi:10.1093/ije/dys112

Formatted: English (U.S.)

Zhang M and Kang J, Towards the evaluation, description, and creation of soundscapes in urban open spaces. *Environ Plann B*, 2007, 34: p. 68-86.

Formatted: English (U.S.)

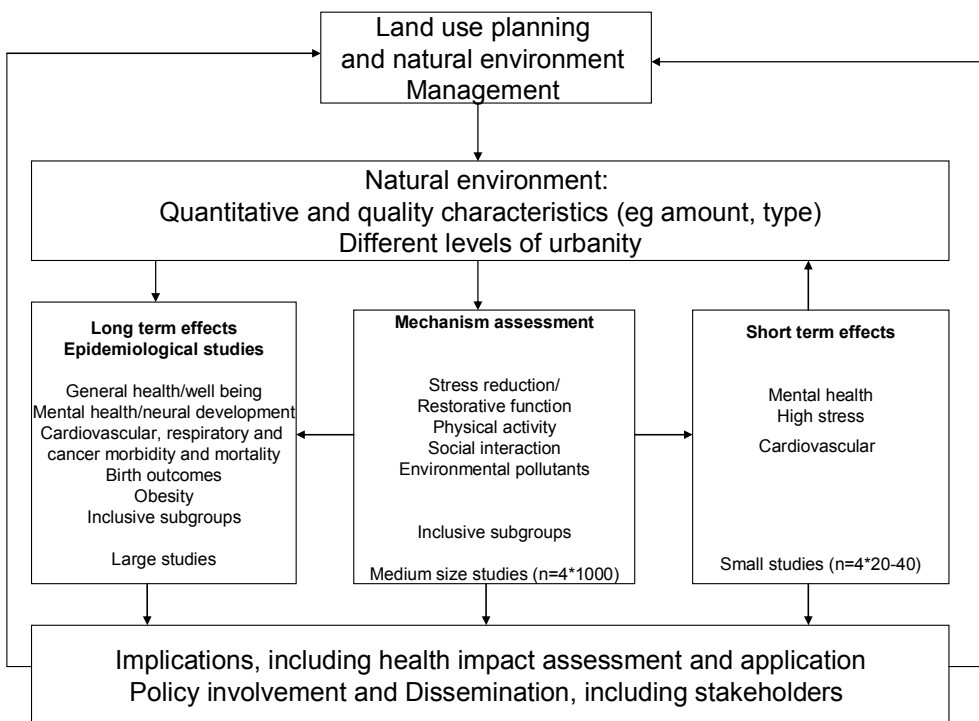

Figure 1: Interdependencies of different parts of the PHENOTYPE project

Table 1 PHENOTYPE study mechanisms, outcomes, populations and regions

It will explore underlying mechanisms related to:

- stress reduction/restorative function
  - physical activity
  - social interaction/social cohesion
- exposure to environmental hazards (e.g. noise/acoustic quality, air pollution)

Both preventative and therapeutic effects (patients) will be considered. Outcomes of interest that are evaluated are:

- general health and well-being (including medically unexplained symptoms (MUPS))
- mental health/neural development
- stress
- cardiovascular, cancer and respiratory mortality and morbidity
- birth outcomes
- obesity

It will examine the effects for different population groups, including more vulnerable populations:

- pregnant women and/or foetus
- age groups (children, elderly)
- (lower) socio-economic status
- ethnic minorities
- patients/people with specific health complaints

It will conduct comparative studies in different regions of Europe to examine any underlying regional, social and/or cultural differences related to the meanings, uses, mechanisms and health effects of the natural environment and we will include the:

- North west (Netherlands, England)
- South (Spain)
- East (Lithuania)

Table 2 Limitations of current green space work and work undertaken by PHENOTYPE to address these

| Limitations of current available work                                                                                                                                                                                                          | What PHENOTYPE will do                                                                                                                                                                                                                                                                                                                                                                                                                                                                                                                                                                                                               |
|------------------------------------------------------------------------------------------------------------------------------------------------------------------------------------------------------------------------------------------------|--------------------------------------------------------------------------------------------------------------------------------------------------------------------------------------------------------------------------------------------------------------------------------------------------------------------------------------------------------------------------------------------------------------------------------------------------------------------------------------------------------------------------------------------------------------------------------------------------------------------------------------|
| <ul style="list-style-type: none"> <li>▪ Inconsistency and variation in indicators for green or natural space have often made it difficult to compare results from different studies.</li> </ul>                                               | <ul style="list-style-type: none"> <li>▪ Minimize the potential differences due to classification of natural space, by combining the use of conventional maps and data sources with remote sensing data and aerial photography, gather individual-level data through detailed discussions with subjects living in the areas, and use considerable stakeholder engagement to develop comparable classifications of the natural environment in different countries.</li> <li>▪ Produce a more robust and comparable evidence base on links between exposure to natural outdoor environment and human health and well-being.</li> </ul> |
| <ul style="list-style-type: none"> <li>▪ A number of disease outcomes have been studied, but besides the routinely collected data (which use ICD coding), not always in a standardized and comparable manner in different countries</li> </ul> | <ul style="list-style-type: none"> <li>▪ Produce a more robust and comparable evidence base on links between exposure to natural outdoor environment and human health and well-being, using well studied and new outcomes with standardization between countries.</li> </ul>                                                                                                                                                                                                                                                                                                                                                         |
| <ul style="list-style-type: none"> <li>▪ Potentially very sensitive groups such as pregnant women/fetus have not been studied at all.</li> </ul>                                                                                               | <ul style="list-style-type: none"> <li>▪ Extend the evidence base to new outcomes and vulnerable populations e.g. pregnant women and their foetus, chronic respiratory and cardiovascular patients, ethnic minorities and</li> </ul>                                                                                                                                                                                                                                                                                                                                                                                                 |

1  
2  
3  
4  
5  
6  
7  
8  
9  
10  
11  
12  
13  
14  
15  
16  
17  
18  
19  
20  
21  
22  
23  
24  
25  
26  
27  
28  
29  
30  
31  
32  
33  
34  
35  
36  
37  
38  
39  
40  
41  
42  
43  
44  
45  
46  
47  
48  
49

|                                                                                                                                                                                                                                      |                                                                                                                                                                                                                                                                            |
|--------------------------------------------------------------------------------------------------------------------------------------------------------------------------------------------------------------------------------------|----------------------------------------------------------------------------------------------------------------------------------------------------------------------------------------------------------------------------------------------------------------------------|
|                                                                                                                                                                                                                                      | low social economic class.                                                                                                                                                                                                                                                 |
| <ul style="list-style-type: none"> <li>Most studies focused on green space; the evidence base for the effects of blue space is very limited.</li> </ul>                                                                              | <ul style="list-style-type: none"> <li>Not only examine the effects of green space, but also of blue space.</li> </ul>                                                                                                                                                     |
| <ul style="list-style-type: none"> <li>Most of the green space studies have been conducted in the US or the North West of Europe.</li> </ul>                                                                                         | <ul style="list-style-type: none"> <li>Conduct comparable studies across Europe and produce evidence for North Western, Eastern and Southern Europe. This will deliver insights into regional, social and/or cultural differences in relation to natural space.</li> </ul> |
| <ul style="list-style-type: none"> <li>Most studies do not include actual use of the natural environment.</li> </ul>                                                                                                                 | <ul style="list-style-type: none"> <li>Consider actual use of the natural environment, an often neglected but fundamental indicator in relation to exposure to natural environments.</li> </ul>                                                                            |
| <ul style="list-style-type: none"> <li>There appeared to be differences by social group, with some apparently benefiting more than others from natural space, but the evidence is sparse.</li> </ul>                                 | <ul style="list-style-type: none"> <li>Produce a more robust and comparable evidence base on links between exposure to natural outdoor environment and human health and well-being, with special attention for effect modification by social groups</li> </ul>             |
| <ul style="list-style-type: none"> <li>A number of potential mechanisms have been suggested, including increased physical activity and social contacts for those living near natural space, natural environments exerting</li> </ul> | <ul style="list-style-type: none"> <li>Examine the proposed mechanisms (physical activity, stress, social contacts, and environmental risk factors) simultaneously in a large sample in various countries (WP2). This will enable</li> </ul>                               |



|                                                                                                                                                                                                                                                                                                                                                                                                                                                                                                                                            |                                                                                                                                                                                                                                                                                                                                                                                      |
|--------------------------------------------------------------------------------------------------------------------------------------------------------------------------------------------------------------------------------------------------------------------------------------------------------------------------------------------------------------------------------------------------------------------------------------------------------------------------------------------------------------------------------------------|--------------------------------------------------------------------------------------------------------------------------------------------------------------------------------------------------------------------------------------------------------------------------------------------------------------------------------------------------------------------------------------|
| <p>stress lowering or attention restoring effects, and reducing environmental hazards (e.g. air pollution, high temperatures). However, the studies of potential mechanisms have often been limited to assessing one mechanism at the time, which increases the likelihood of unmeasured confounding effects and misses the opportunity to study these potentially interrelated mechanisms in coherence-</p> <ul style="list-style-type: none"> <li>▪ to study the mechanisms in coherence even though they may be interrelated</li> </ul> | <p>us to study specific factors while adjusting for others, and thereby strengthening the interpretation of the results</p>                                                                                                                                                                                                                                                          |
| <ul style="list-style-type: none"> <li>▪ Unable to answer what specific quantitative and qualitative characteristics of the natural environment have a positive effect on health and well-being, through what pathways is still largely unknown.</li> </ul>                                                                                                                                                                                                                                                                                | <ul style="list-style-type: none"> <li>▪ Make classifications for the type and level of the indicators, which is important for policy makers.</li> <li>▪ Examine the importance of both quantitative (amount, type, access, use) and qualitative characteristics (acoustic quality, identity, variety, safety) of the natural environment</li> </ul>                                 |
| <ul style="list-style-type: none"> <li>▪ Limited research exploring the sustained affective, cognitive and physiological responses to a single exposure and the effects of a repeated exposure to the same natural environment</li> <li>▪ Unable to explain how policymakers and planners can design a natural environment to maximise health benefits</li> </ul>                                                                                                                                                                          | <ul style="list-style-type: none"> <li>▪ Explore longer-term changes in affect, cognitive function and physiological indicators that have to date only been studied during, or immediately after, engagement with the natural environment.</li> <li>▪ Explore the immediate, maintained and long-term effects of repeated engagement with the same natural environment on</li> </ul> |

1  
2  
3  
4  
5  
6  
7  
8  
9  
10  
11  
12  
13  
14  
15  
16  
17  
18  
19  
20  
21  
22  
23  
24  
25  
26  
27  
28  
29  
30  
31  
32  
33  
34  
35  
36  
37  
38  
39  
40  
41  
42  
43  
44  
45  
46  
47  
48  
49

|                                                                                                                                               |                                                                                                                                |
|-----------------------------------------------------------------------------------------------------------------------------------------------|--------------------------------------------------------------------------------------------------------------------------------|
|                                                                                                                                               | affect, cognitive function, and physiological indicators of well-being .                                                       |
| <ul style="list-style-type: none"> <li>▪ Guidelines of lifestyle, health and well being have largely undervalued local populations</li> </ul> | <ul style="list-style-type: none"> <li>▪ Include lifestyle, health and well being factors of the local populations.</li> </ul> |

For peer review only

Annex-websfigures

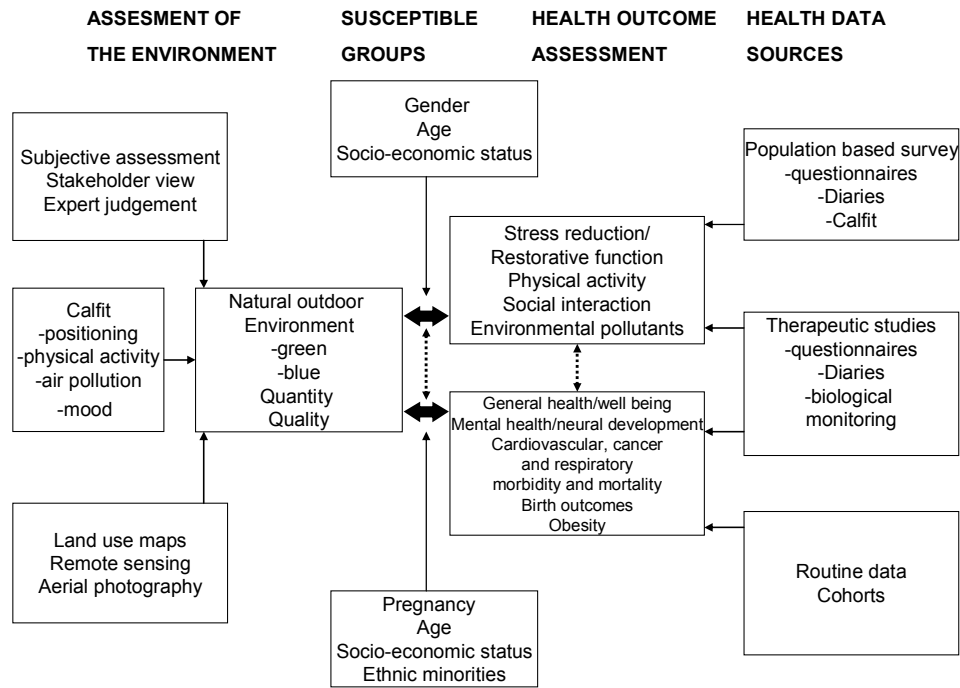

Web Figure 1 Natural outdoor environment, mechanisms and health data input in PHENOTYPE

1  
2  
3  
4  
5  
6  
7  
8  
9  
10  
11  
12  
13  
14  
15  
16  
17  
18  
19  
20  
21  
22  
23  
24  
25  
26  
27  
28  
29  
30  
31  
32  
33  
34  
35  
36  
37  
38  
39  
40  
41  
42  
43  
44  
45  
46  
47  
48  
49

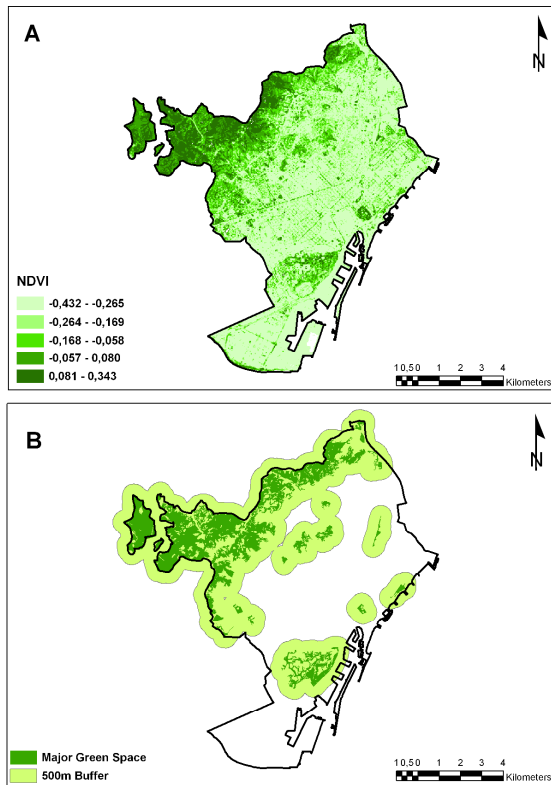

peer review only

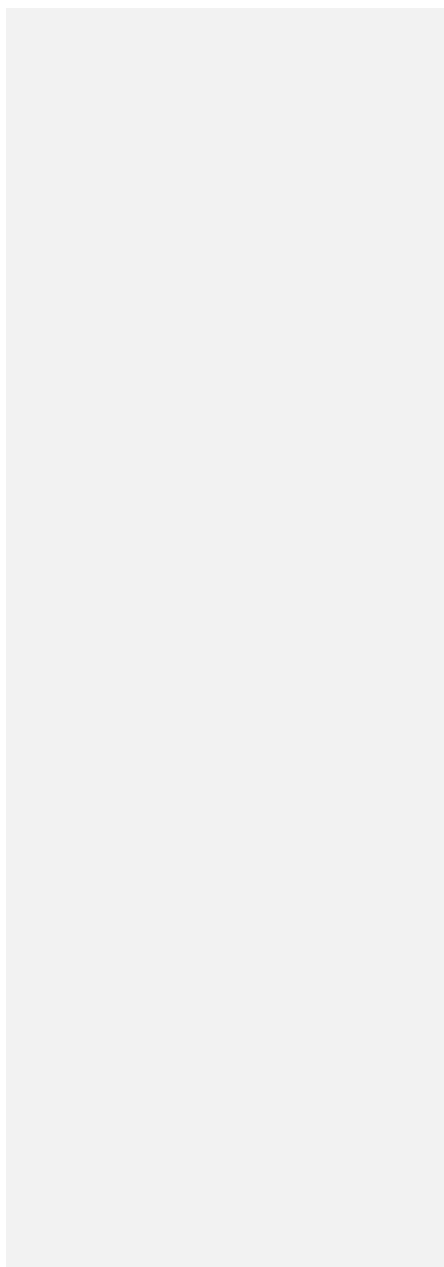

Web Figure 2 NDVI map of Barcelona and buffers around major green space areas

1  
2  
3  
4  
5  
6  
7  
8  
9  
10  
11  
12  
13  
14  
15  
16  
17  
18  
19  
20  
21  
22  
23  
24  
25  
26  
27  
28  
29  
30  
31  
32  
33  
34  
35  
36  
37  
38  
39  
40  
41  
42  
43  
44  
45  
46  
47  
48  
49

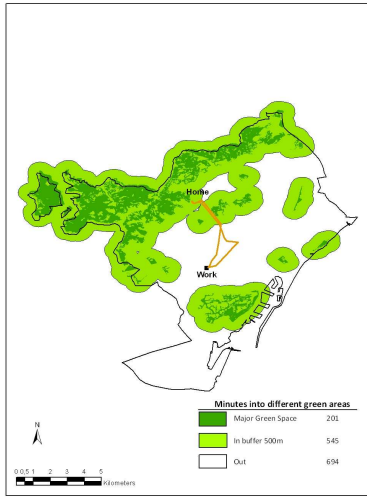

For peer review only



Web Figure 3 Mobility pattern for a subject in Barcelona obtained with the Calfit tool

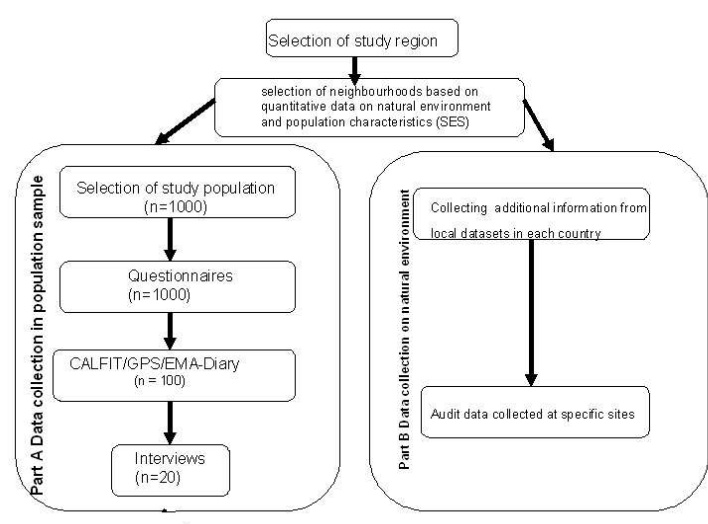

view only

Web Figure 4 Design of data collection in 4 European case cities to study the underlying mechanism

1  
2  
3  
4  
5  
6  
7  
8  
9  
10  
11  
12  
13  
14  
15  
16  
17  
18  
19  
20  
21  
22  
23  
24  
25  
26  
27  
28  
29  
30  
31  
32  
33  
34  
35  
36  
37  
38  
39  
40  
41  
42  
43  
44  
45  
46  
47  
48  
49

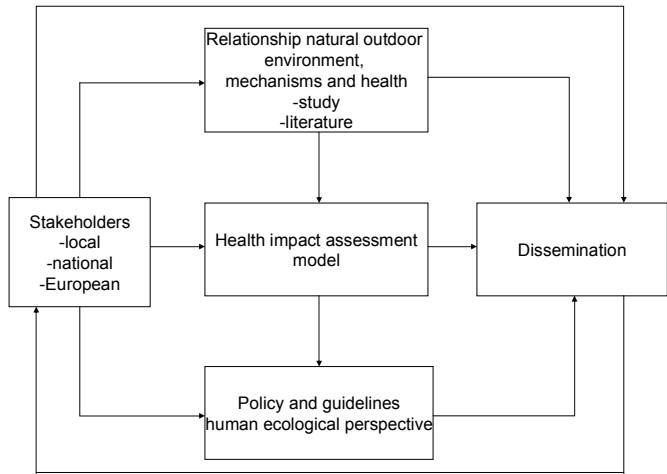

Web Figure 5 Stakeholder input and dissemination

1  
2  
3  
4  
5  
6  
7  
8  
9  
10  
11  
12  
13  
14  
15  
16  
17  
18  
19  
20  
21  
22  
23  
24  
25  
26  
27  
28  
29  
30  
31  
32  
33  
34  
35  
36  
37  
38  
39  
40  
41  
42  
43  
44  
45  
46  
47  
48  
49



For peer review only

Web Table 1 Currently available databases and cohorts for inclusion in PHENOTYPE

| Study       | n    | Population                                                     | Collected outcomes                                                                                                                                                                                                    | Relevant covariate and mechanism data                                  |
|-------------|------|----------------------------------------------------------------|-----------------------------------------------------------------------------------------------------------------------------------------------------------------------------------------------------------------------|------------------------------------------------------------------------|
| CREAL Spain |      |                                                                |                                                                                                                                                                                                                       |                                                                        |
| PISCINA     | 3000 | Children 6-9, 2006, Sabadell, Catalonia                        | Respiratory health<br>BMI                                                                                                                                                                                             | Social economic status<br>Physical activity<br>Air pollution           |
| INMA        | 3000 | Children, 2-10, ongoing around Spain                           | Birth weight and gestation, respiratory health, neural development                                                                                                                                                    | Social economic status<br>Physical activity<br>Stress<br>Air pollution |
| PAC-COPD    | 342  | Patients with chronic obstructive pulmonary disease (PAC-CODP) | Hospital admissions<br>All cause and specific mortality<br>Functional data (lung function, cardiovascular function)<br>Symptoms and co-morbidities<br>Quality of life<br>Mental status<br>Body weight and composition | Social economic status<br>Physical activity<br>Air pollution           |



|                                         |                                             |                                                                                                                                           |                                                                                                |                                                              |
|-----------------------------------------|---------------------------------------------|-------------------------------------------------------------------------------------------------------------------------------------------|------------------------------------------------------------------------------------------------|--------------------------------------------------------------|
| ECRHS                                   | 8500                                        | Adult population in many cities around Europe                                                                                             | Respiratory health<br>Short form SF36                                                          | Social economic status<br>Physical activity<br>Air pollution |
| Routine data Catalonia                  | Pop 7M<br>0.5 million deaths                | All, 1999-2006, Catalonia                                                                                                                 | All cause and specific mortality                                                               | Social economic status                                       |
| Hospital clinic database                | 16000                                       | Births, 2000-2005 Barcelona                                                                                                               | Birth weight and gestation                                                                     | Social economic status<br>Air pollution                      |
| Netherlands                             |                                             |                                                                                                                                           |                                                                                                |                                                              |
| Cohort of Dutch inhabitants Netherlands | Pop 16M                                     | All, 2000-2008                                                                                                                            | All cause and specific mortality and morbidity                                                 | Social economic status                                       |
| Doetinchem cohort                       | Approximately 5000 over a period of 5 years | See: Verschuren WMM, Blokstra A, Picavet HSJ, Smit HA. The Doetinchem cohort study (cohort profile) Int J Epidemiol 2008; 37(6):1236-1241 | Body weight, serum cholesterol, mortality, morbidity, health-related quality of life (RAND-36) | Social economic status, physical activity                    |
| Health survey Utrecht                   | 3475                                        | Adults 3475 (19-99 years)                                                                                                                 | lifestyle, perceived health, chronic diseases                                                  | Socioeconomic status, physical activity                      |
| United Kingdom                          |                                             |                                                                                                                                           |                                                                                                |                                                              |
| Born in Bradford                        | 12000                                       | Babies, ongoing, England (large ethnic population) and their parents for a subgroup                                                       | Birth weight and gestation<br>General and mental health parents in a                           | Social economic status<br>Air pollution<br>Detailed          |

|                                              |             |                                                                                                                        |                                                                                                                                                          |                                                                          |
|----------------------------------------------|-------------|------------------------------------------------------------------------------------------------------------------------|----------------------------------------------------------------------------------------------------------------------------------------------------------|--------------------------------------------------------------------------|
|                                              |             |                                                                                                                        | subset of 1500                                                                                                                                           | ethnicity                                                                |
| Routine hospital emissions/disease incidence |             | Small area-level data for Stoke-on-Trent/Staffordshire                                                                 | Rates and nature of hospital episodes (e.g., respiratory, CVD), morbidity and mortality                                                                  | Social economic status<br>Air pollution                                  |
| National health data                         |             | Small area-level health data for UK                                                                                    | Nature and rates of morbidity and mortality                                                                                                              | Social economic status<br>Air pollution                                  |
| Lithuania                                    |             |                                                                                                                        |                                                                                                                                                          |                                                                          |
| Routine morbidity data Lithuania             | 0.5 million | Lithuania population, all age groups. Classification of all registered cases causes according to ICD-10 revision codes | Urban-rural area, age, sex, cardiovascular, respiratory, cancer, and other morbidity by districts                                                        | Social and demographic status                                            |
| Routine mortality data Lithuania             | 0.5 million | Lithuania population, all age groups. Classification of all registered cases causes according to ICD-10 revision codes | Urban-rural area, age, sex, cardiovascular, respiratory, cancer, and other morbidity by districts                                                        | Social and demographic status                                            |
| Detailed Health survey                       | 7000        | Representative sample adults of Kaunas citizens, Lithuania                                                             | General health including Blood pressure, high cholesterol and diabetes, Depression<br>Physical functioning<br>Cognitive function<br>Psychosocial factors | Social economic status<br>Air pollution<br>Physical activities<br>Stress |
| Kaunas birth                                 | 4,260       | Kaunas babies and their parents for a subgroup                                                                         | Birth weight and                                                                                                                                         | Social,                                                                  |

1  
2  
3  
4  
5  
6  
7  
8  
9  
10  
11  
12  
13  
14  
15  
16  
17  
18  
19  
20  
21  
22  
23  
24  
25  
26  
27  
28  
29  
30  
31  
32  
33  
34  
35  
36  
37  
38  
39  
40  
41  
42  
43  
44  
45  
46  
47  
48  
49

|        |  |                                                                                                                               |                 |                                                  |
|--------|--|-------------------------------------------------------------------------------------------------------------------------------|-----------------|--------------------------------------------------|
| cohort |  | <a href="http://www.birthcohorts.net/Cohort.Show.asp?cohortid=87">http://www.birthcohorts.net/Cohort.Show.asp?cohortid=87</a> | gestational age | demographic,<br>economic status<br>Air pollution |
|--------|--|-------------------------------------------------------------------------------------------------------------------------------|-----------------|--------------------------------------------------|

For peer review only

Web Table 2. Summary of proposed experimental design in each partner country in PHENOTYPE

|             | Country              | Sample                                       | Summary design                                                                                                                                                                                                                              | Measures |                    |                                                                                |                                                       |                                                                 |
|-------------|----------------------|----------------------------------------------|---------------------------------------------------------------------------------------------------------------------------------------------------------------------------------------------------------------------------------------------|----------|--------------------|--------------------------------------------------------------------------------|-------------------------------------------------------|-----------------------------------------------------------------|
|             |                      |                                              |                                                                                                                                                                                                                                             | Affect   | Cognition          | Physiological                                                                  | Environment                                           | Other                                                           |
| Preventive  | UK: study 1          | Healthy adults (n=40)                        | - Field-based<br>- Within-subjects<br>- 30-minute exposure to natural green, natural green/blue, and urban environment<br>- Measures at baseline (pre-exposure), 30 and 60-minutes post exposure                                            | Mood     | Cognitive function | - Salivary cortisol<br>- HR<br>- HRV<br>- BP                                   | Perceived restoration                                 | RPE<br>Walking speed                                            |
|             | UK: study 2          | Healthy adults (n=40)                        | - Field-based<br>- Between groups<br>- 30-minute exposure to natural <i>or</i> urban environment on three consecutive days<br>- Measures at baseline (day 1), 0, 30 and 60-minutes on exposure days (days 2-4) and final follow-up on day 5 | Mood     | Cognitive function | - Salivary cortisol<br>- HR<br>- HRV<br>- BP                                   | Perceived restoration                                 | RPE<br>Walking speed<br>Hedonic and eudemonic life satisfaction |
|             | Netherlands: study 1 | Healthy adults (n=50)                        | - Laboratory-base<br>- Within subjects<br>- Shown images of natural and urban environment before a stressor (model 1) and after a stressor (model 2) stressor (to explore buffering and restorative effects, respectively)                  | Mood     | Cognitive function | - Salivary cortisol<br>- HR<br>- HRV<br>- BP                                   | Perceived restoration                                 |                                                                 |
|             | Netherlands: study 2 | Healthy adults (n=25)                        | - Laboratory-based<br>- Within subjects<br>- Shown images of natural and urban environment before a stressor (model 1) and after a stressor (model 2) stressor (to explore buffering and restorative effects, respectively)                 | Mood     | Cognitive function | - Neurological response (fMRI)<br>- Salivary cortisol<br>- HR<br>- HRV<br>- BP | Perceived restoration                                 |                                                                 |
| Therapeutic | Spain                | Adults with elevated stress levels (n=20-40) | - Field-based<br>- Exposure to natural green, natural green/blue, and urban environment over several hours<br>- Measures at baseline (pre-exposure), 30 and                                                                                 | Mood     | Cognitive function | - Salivary cortisol<br>- HR<br>- HRV<br>- BP                                   | - Perceived restoration<br>- Air pollution<br>- Noise | RPE<br>Walking speed<br>Social interaction                      |

|  |           |                        |                                                                                                                                                                                                                                                                                                 |      |                    |                                                                                      |                       |                                |
|--|-----------|------------------------|-------------------------------------------------------------------------------------------------------------------------------------------------------------------------------------------------------------------------------------------------------------------------------------------------|------|--------------------|--------------------------------------------------------------------------------------|-----------------------|--------------------------------|
|  |           |                        | 60-minutes post exposure<br>- Participants given CALFIT phones for some days for longer term monitoring (mood, social interaction, physical activity)                                                                                                                                           |      |                    |                                                                                      | pollution             | and physical activity (CALFIT) |
|  | Lithuania | Adults with CAD (n=20) | - Field-based<br>- Between-subjects<br>- 30-minute exposure to natural green <i>or</i> urban environment on two consecutive days (days 2 and 3)<br>- Measures at baseline (pre-exposure), 30 and 60-minutes post exposure<br>- Walking treadmill test at baseline (day 1) and follow-up (day 2) | Mood | Cognitive function | - Exercise capacity (treadmill test)<br>- Salivary cortisol<br>- HR<br>- HRV<br>- BP | Perceived restoration | RPE<br>Walking speed           |

CAD, coronary artery disease; HR, heart rate; HRV, heart rate variability; BP, blood pressure, RPE, rate of perceived exertion; fMRI, functional magnetic resonance imaging

1  
2  
3  
4  
5  
6  
7  
8  
9  
10  
11  
12  
13  
14  
15  
16  
17  
18  
19  
20  
21  
22  
23  
24  
25  
26  
27  
28  
29  
30  
31  
32  
33  
34  
35  
36  
37  
38  
39  
40  
41  
42  
43  
44  
45  
46  
47  
48  
49

For peer review only

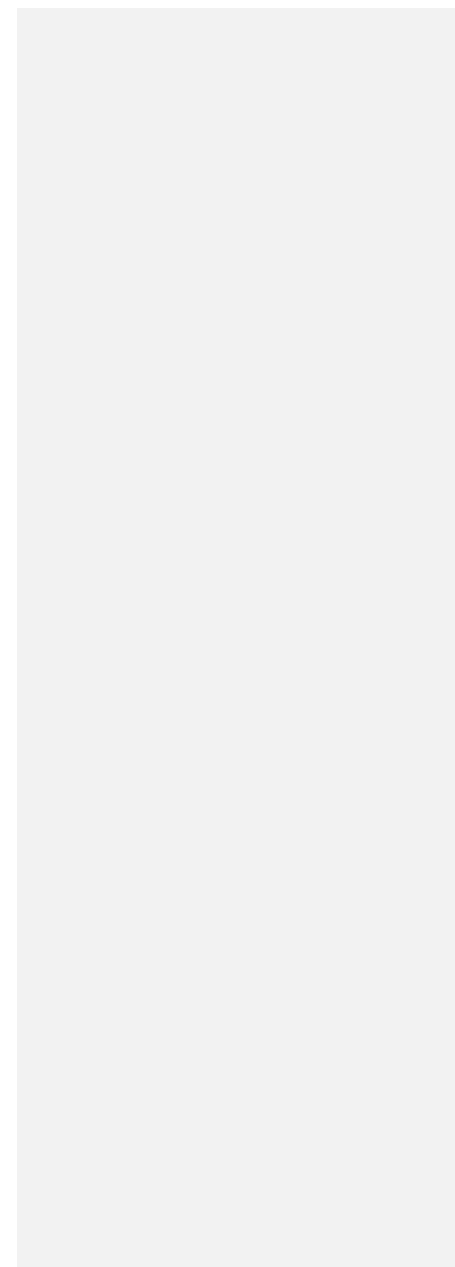

21:00 PM

08:00 PM

08:00 PM

08:00 PM

For peer review only

- 1
- 2
- 3
- 4
- 5
- 6
- 7
- 8
- 9
- 10
- 11
- 12
- 13
- 14
- 15
- 16
- 17
- 18
- 19
- 20
- 21
- 22
- 23
- 24
- 25
- 26
- 27
- 28
- 29
- 30
- 31
- 32
- 33
- 34
- 35
- 36
- 37
- 38
- 39
- 40
- 41
- 42
- 43
- 44
- 45
- 46
- 47
- 48
- 49
- 50
- 51
- 52
- 53
- 54
- 55
- 56
- 57
- 58
- 59
- 60

08:00 PM

1

08:00 PM

3

4

45:00 PM

6

7

44:00 PM

9

10

45:00 PM

11

12

13

45:00 PM

14

15

45:00 PM

16

17

18

45:00 PM

20

21

45:00 PM

23

24

45:00 PM

25

26

27

28

29

30

31

32

33

34

35

36

37

38

39

40

41

42

43

44

45

46

47

48

49

50

51

52

53

54

55

56

57

58

59

60

For peer review only



Figure 1

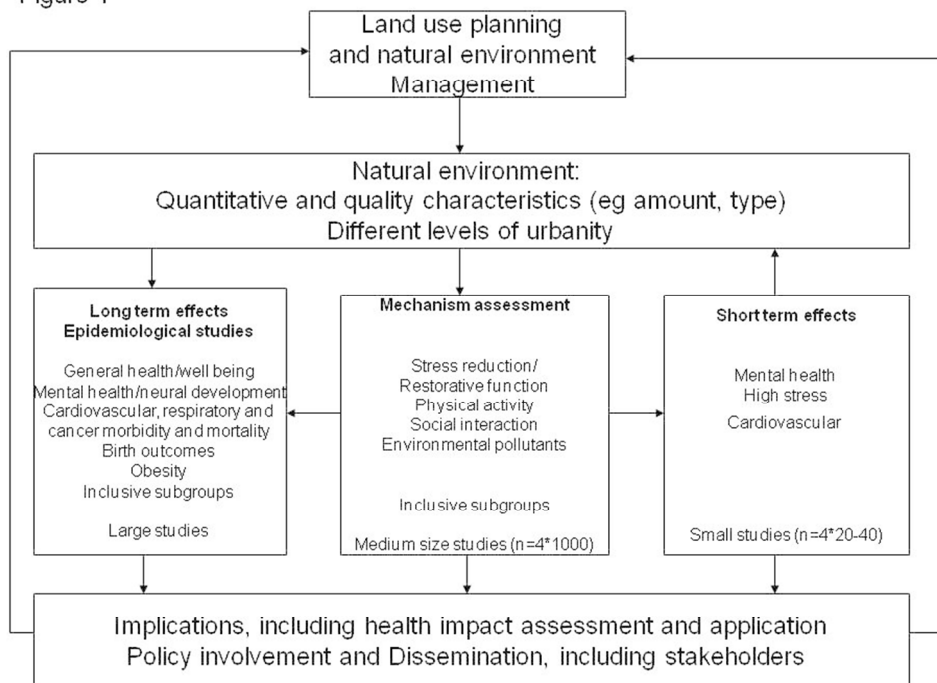

254x190mm (96 x 96 DPI)

Review only

1  
2  
3  
4  
5  
6  
7  
8  
9  
10  
11  
12  
13  
14  
15  
16  
17  
18  
19  
20  
21  
22  
23  
24  
25  
26  
27  
28  
29  
30  
31  
32  
33  
34  
35  
36  
37  
38  
39  
40  
41  
42  
43  
44  
45  
46  
47  
48  
49  
50  
51  
52  
53  
54  
55  
56  
57  
58  
59  
60

1  
2  
3  
4  
5  
6  
7  
8  
9  
10  
11  
12  
13  
14  
15  
16  
17  
18  
19  
20  
21  
22  
23  
24  
25  
26  
27  
28  
29  
30  
31  
32  
33  
34  
35  
36  
37  
38  
39  
40  
41  
42  
43

**ASSESSMENT OF THE ENVIRONMENT**

**SUSCEPTIBLE GROUPS**

**HEALTH OUTCOME ASSESSMENT**

**HEALTH DATA SOURCES**

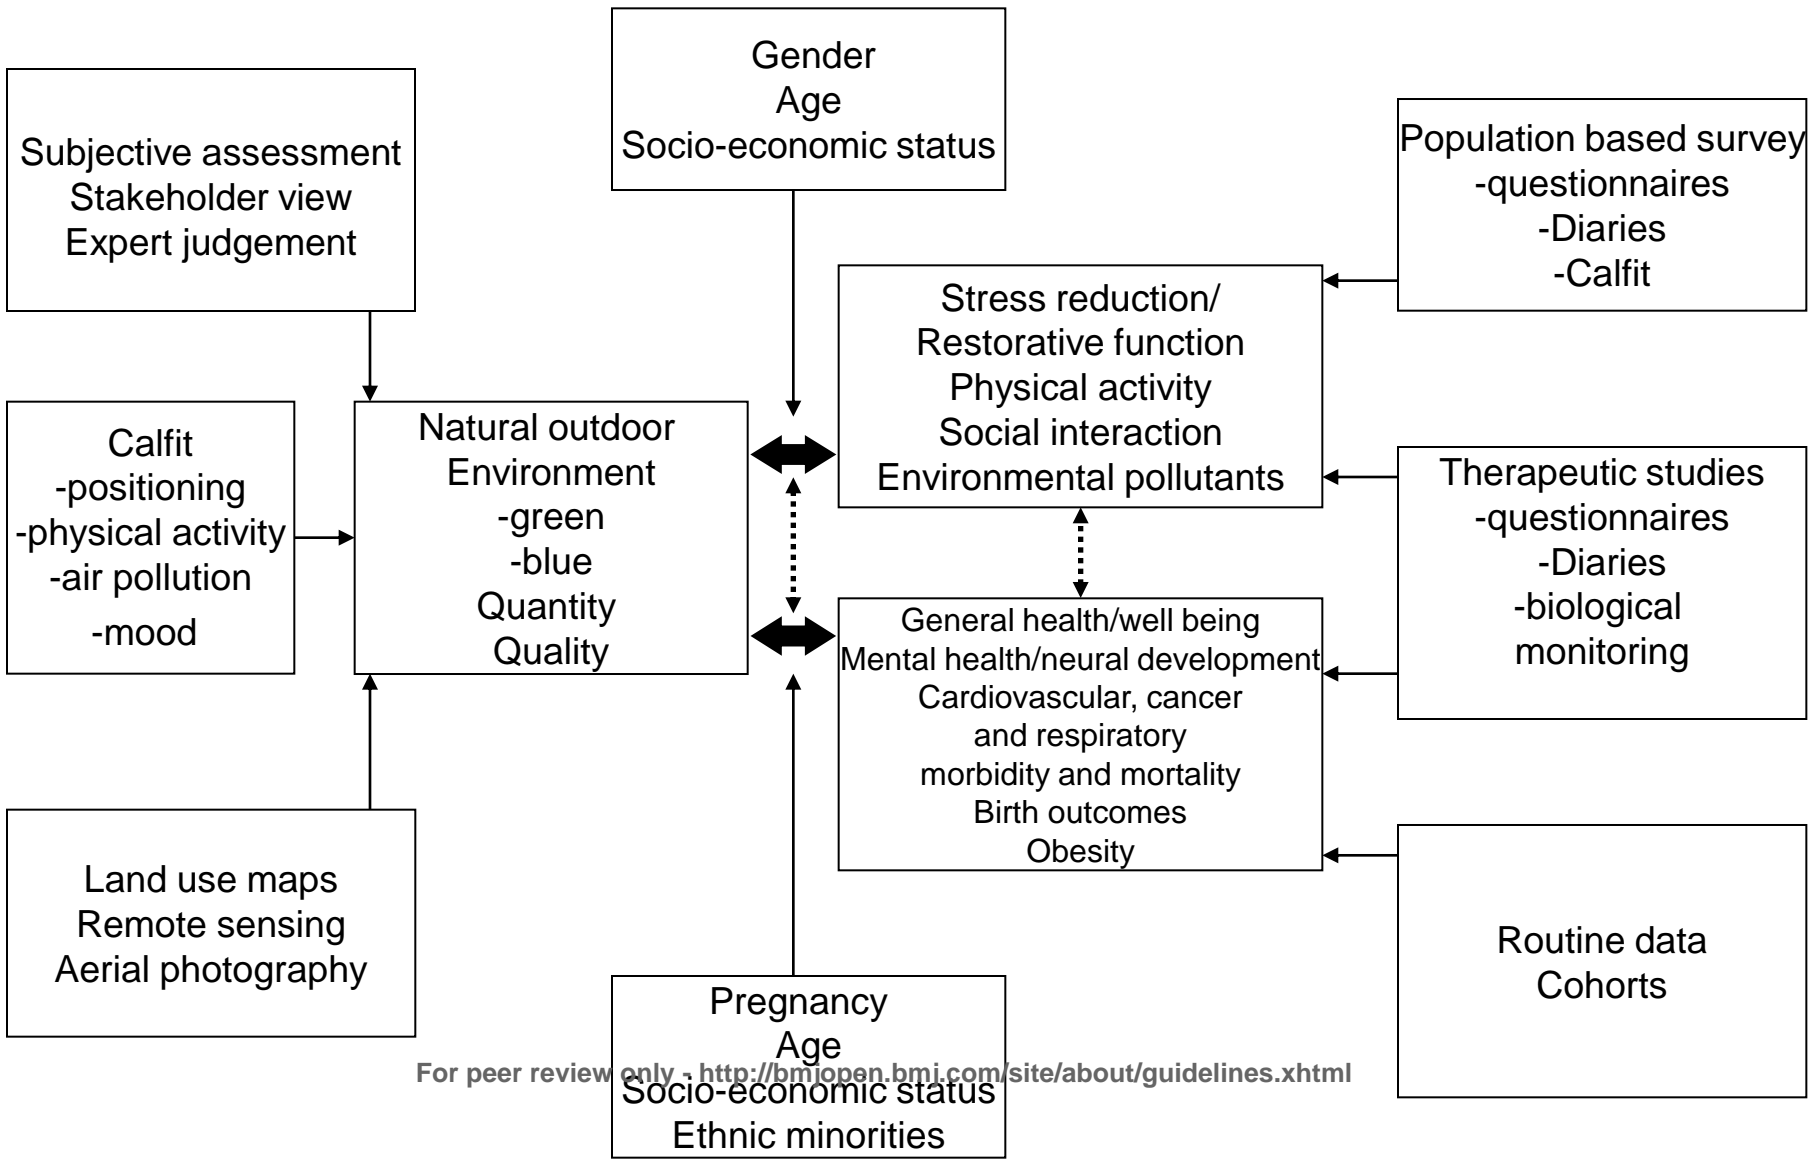

# Web figure 2

1  
2  
3  
4  
5  
6  
7  
8  
9  
10  
11  
12  
13  
14  
15  
16  
17  
18  
19  
20  
21  
22  
23  
24  
25  
26  
27  
28  
29  
30  
31  
32  
33  
34  
35  
36  
37  
38  
39  
40  
41  
42  
43

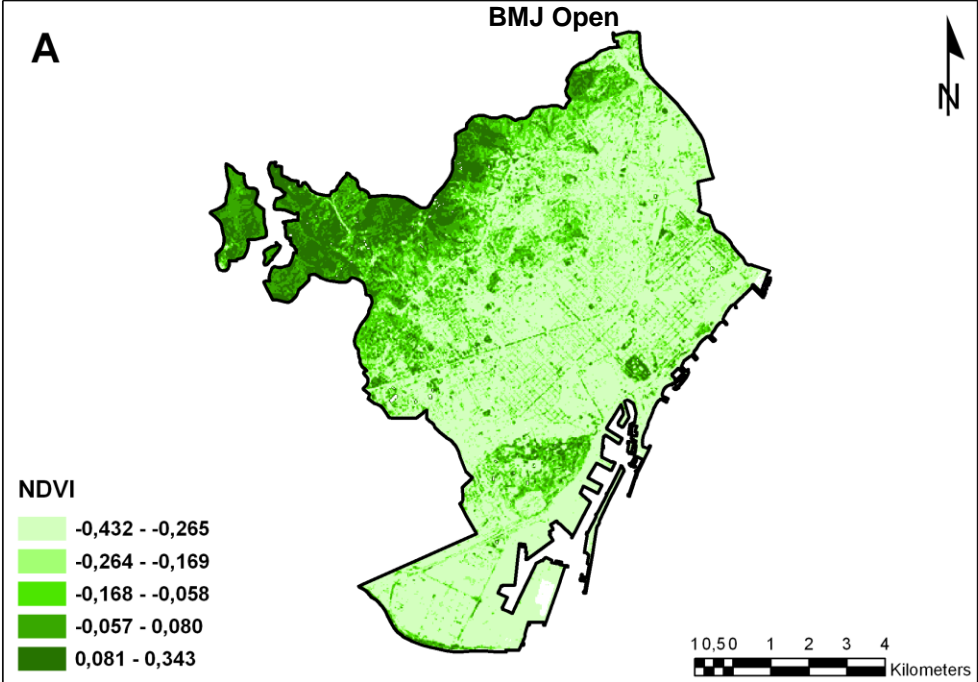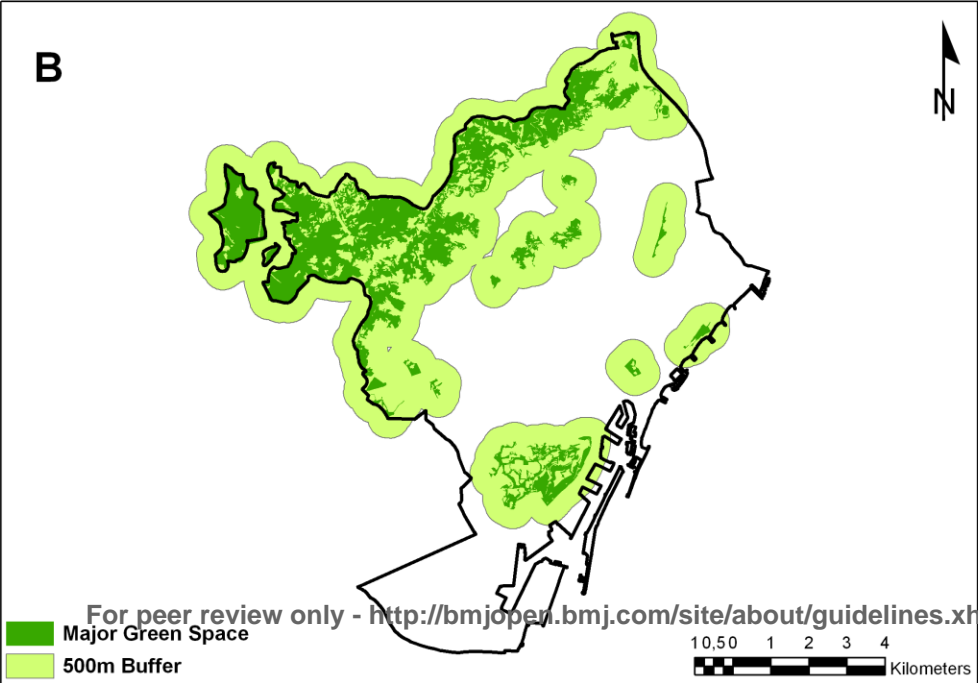

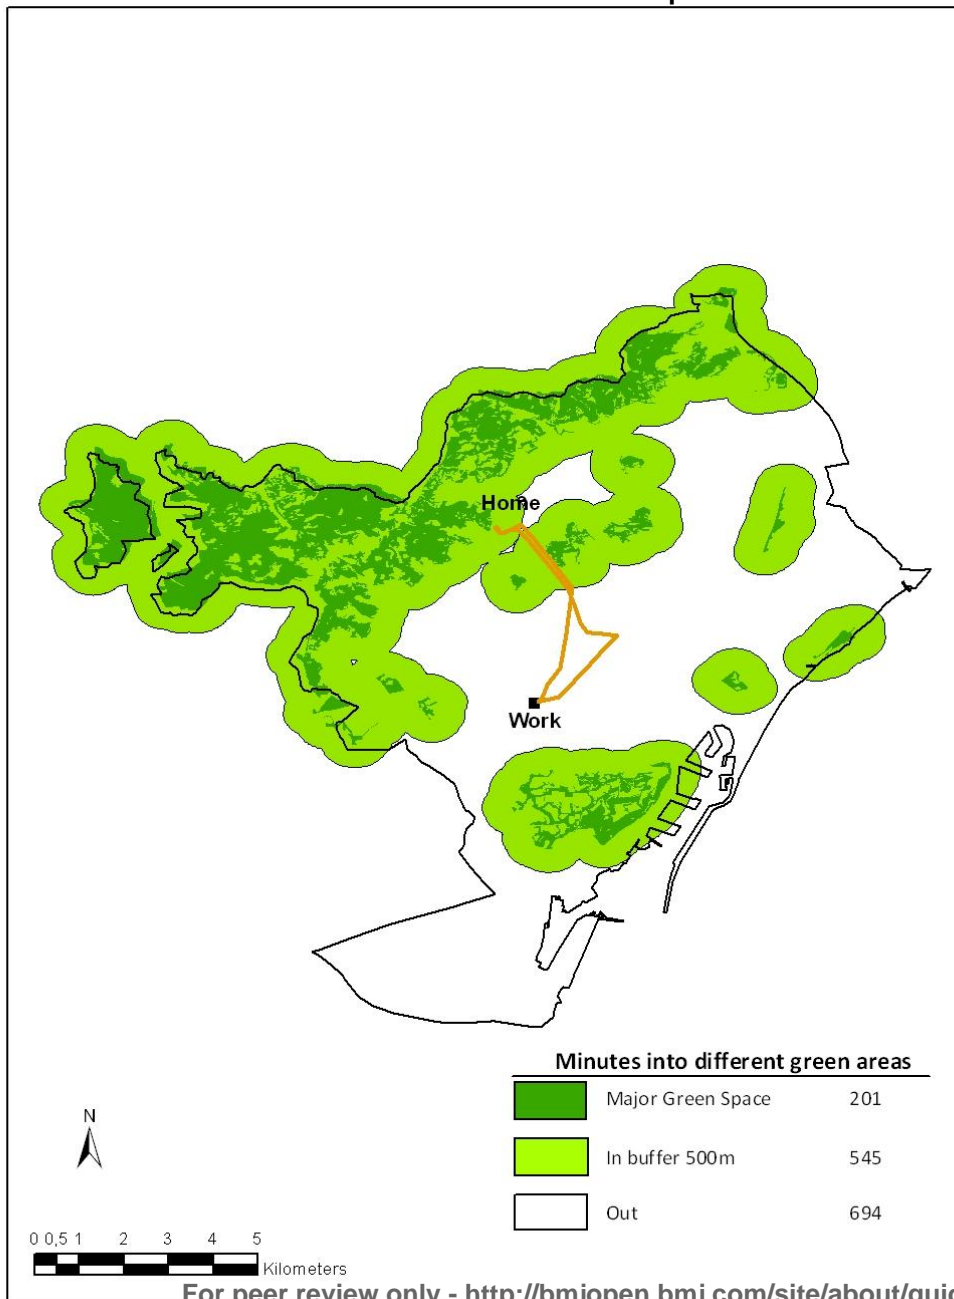

1  
2  
3  
4  
5  
6  
7  
8  
9  
10  
11  
12  
13  
14  
15  
16  
17  
18  
19  
20  
21  
22  
23  
24  
25  
26  
27  
28  
29  
30  
31  
32  
33  
34  
35  
36  
37  
38  
39  
40  
41  
42  
43

## Web figure 4

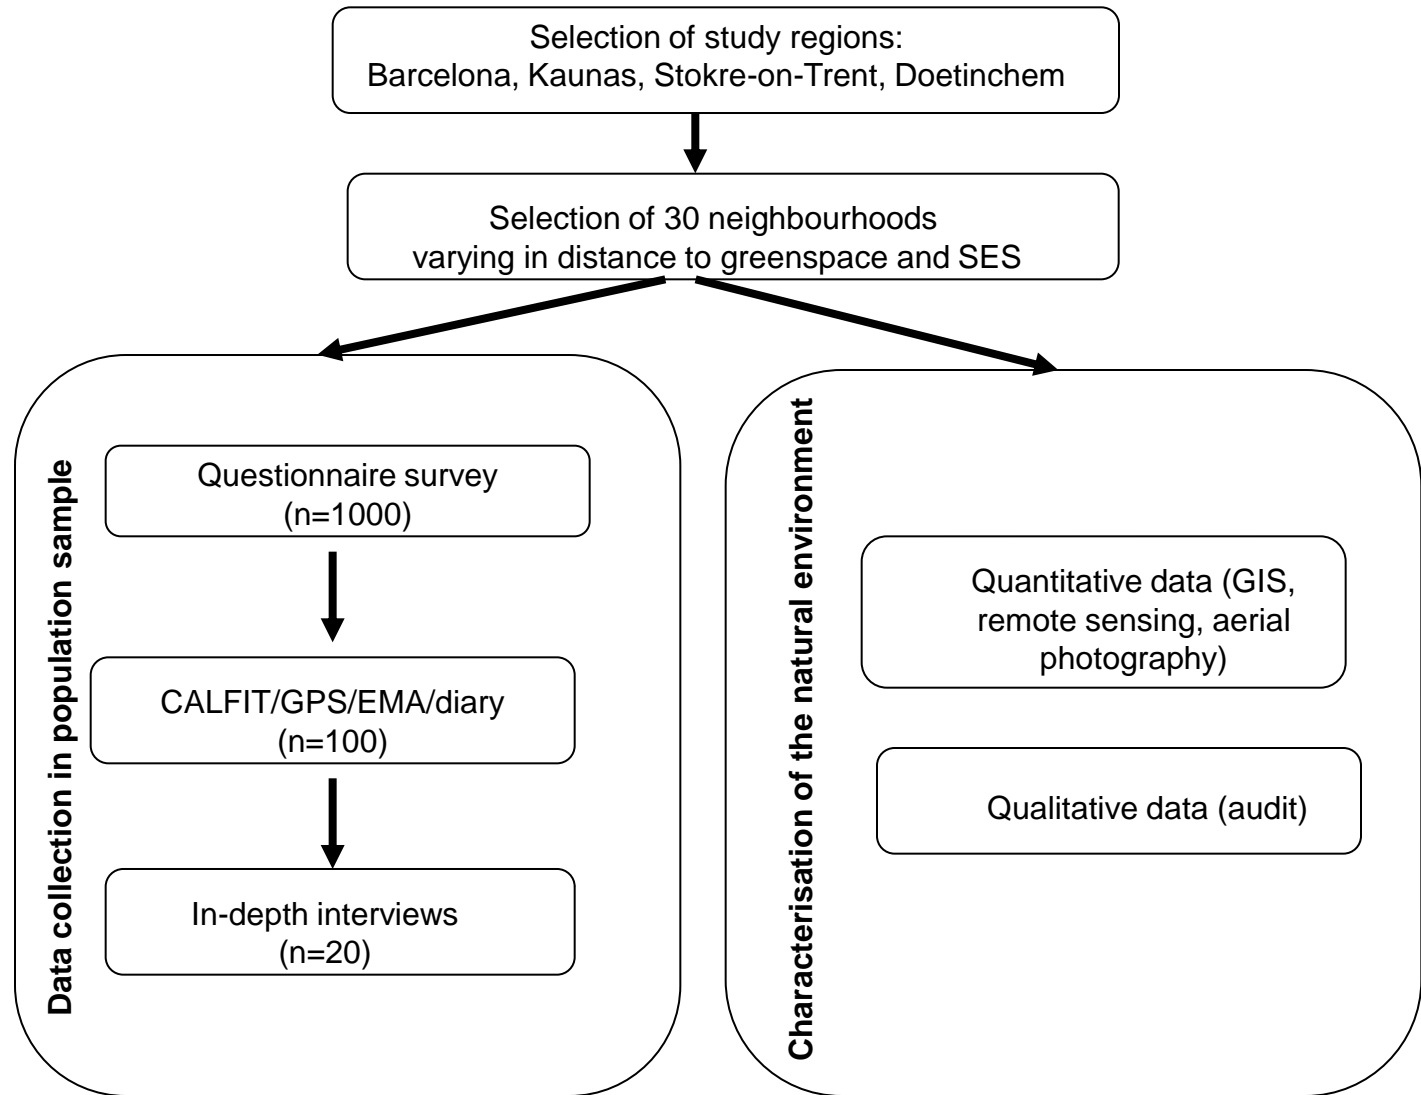

1  
2  
3  
4  
5  
6  
7  
8  
9  
10  
11  
12  
13  
14  
15  
16  
17  
18  
19  
20  
21  
22  
23  
24  
25  
26  
27  
28  
29  
30  
31  
32  
33  
34  
35  
36  
37  
38  
39  
40  
41  
42  
43

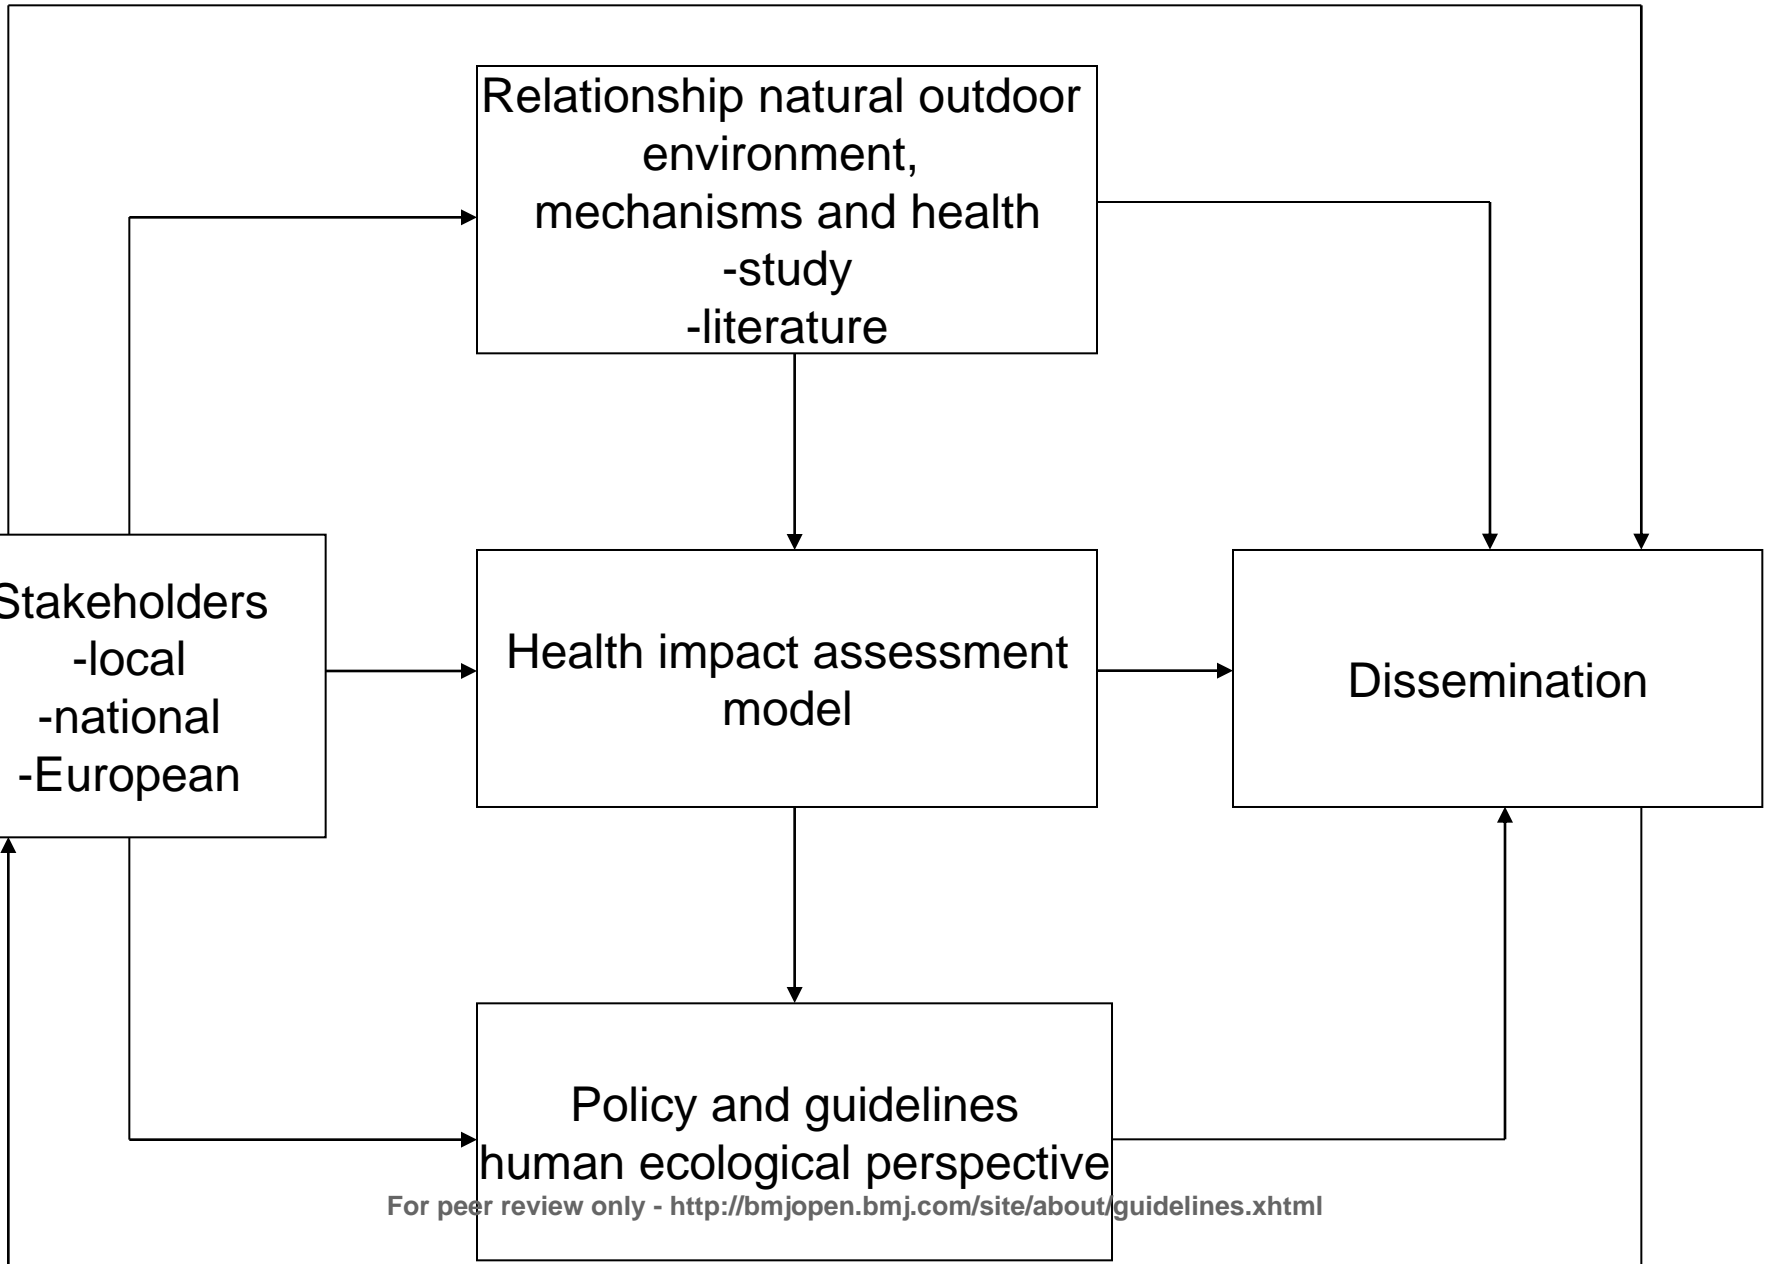

**Web Table 1 Currently available databases and cohorts for inclusion in PHENOTYPE**

| Study       | n    | Population                                                     | Collected outcomes                                                                                                                                                                                                    | Relevant covariate and mechanism data                                  |
|-------------|------|----------------------------------------------------------------|-----------------------------------------------------------------------------------------------------------------------------------------------------------------------------------------------------------------------|------------------------------------------------------------------------|
| CREAL Spain |      |                                                                |                                                                                                                                                                                                                       |                                                                        |
| PISCINA     | 3000 | Children 6-9, 2006, Sabadell, Catalonia                        | Respiratory health<br>BMI                                                                                                                                                                                             | Social economic status<br>Physical activity<br>Air pollution           |
| INMA        | 3000 | Children, 2-10, ongoing around Spain                           | Birth weight and gestation, respiratory health, neural development                                                                                                                                                    | Social economic status<br>Physical activity<br>Stress<br>Air pollution |
| PAC-COPD    | 342  | Patients with chronic obstructive pulmonary disease (PAC-CODP) | Hospital admissions<br>All cause and specific mortality<br>Functional data (lung function, cardiovascular function)<br>Symptoms and co-morbidities<br>Quality of life<br>Mental status<br>Body weight and composition | Social economic status<br>Physical activity<br>Air pollution           |
| ECRHS       | 8500 | Adult population in many cities around Europe                  | Respiratory health<br>Short form SF36                                                                                                                                                                                 | Social economic status<br>Physical activity                            |

|                                                  |                                                   |                                                                                                                                                 |                                                                                                             |                                                                     |
|--------------------------------------------------|---------------------------------------------------|-------------------------------------------------------------------------------------------------------------------------------------------------|-------------------------------------------------------------------------------------------------------------|---------------------------------------------------------------------|
|                                                  |                                                   |                                                                                                                                                 |                                                                                                             | Air pollution                                                       |
| Routine data<br>Catalonia                        | Pop 7M<br>0.5 million<br>deaths                   | All, 1999-2006, Catalonia                                                                                                                       | All cause and specific<br>mortality                                                                         | Social economic<br>status                                           |
| Hospital clinic<br>database                      | 16000                                             | Births, 2000-2005 Barcelona                                                                                                                     | Birth weight and<br>gestation                                                                               | Social economic<br>status<br>Air pollution                          |
| Netherlands                                      |                                                   |                                                                                                                                                 |                                                                                                             |                                                                     |
| Cohort of<br>Dutch<br>inhabitants<br>Netherlands | Pop 16M                                           | All, 2000-2008                                                                                                                                  | All cause and specific<br>mortality and morbidity                                                           | Social economic<br>status                                           |
| Doetinchem<br>cohort                             | Approximately<br>5000 over a<br>period of 5 years | See: Verschuren WMM, Blokstra A, Picavet HSJ, Smit HA.<br>The Doetinchem cohort study (cohort profile) Int J Epidemiol<br>2008; 37(6):1236-1241 | Body weight, serum<br>cholesterol, mortality,<br>morbidity, health-<br>related quality of life<br>(RAND-36) | Social economic<br>status, physical<br>activity                     |
| Health survey<br>Utrecht                         | 3475                                              | Adults 3475 (19-99 years)                                                                                                                       | lifestyle, perceived<br>health, chronic diseases                                                            | Socioeconomic<br>status, physical<br>activity                       |
| United<br>Kingdom                                |                                                   |                                                                                                                                                 |                                                                                                             |                                                                     |
| Born in<br>Bradford                              | 12000                                             | Babies, ongoing, England (large ethnic population) and their<br>parents for a subgroup                                                          | Birth weight and<br>gestation<br>General and mental<br>health parents in a<br>subset of 1500                | Social economic<br>status<br>Air pollution<br>Detailed<br>ethnicity |
| Routine<br>hospital                              |                                                   | Small area-level data for Stoke-on-Trent/Staffordshire                                                                                          | Rates and nature of<br>hospital episodes (e.g.,                                                             | Social economic<br>status                                           |



|                                        |             |                                                                                                                                                                                 |                                                                                                                                                                      |                                                                                |
|----------------------------------------|-------------|---------------------------------------------------------------------------------------------------------------------------------------------------------------------------------|----------------------------------------------------------------------------------------------------------------------------------------------------------------------|--------------------------------------------------------------------------------|
| emissions/<br>disease<br>incidence     |             |                                                                                                                                                                                 | respiratory, CVD),<br>morbidity and mortality                                                                                                                        | Air pollution                                                                  |
| National<br>health data                |             | Small area-level health data for UK                                                                                                                                             | Nature and rates of<br>morbidity and mortality                                                                                                                       | Social economic<br>status<br>Air pollution                                     |
| Lithuania                              |             |                                                                                                                                                                                 |                                                                                                                                                                      |                                                                                |
| Routine<br>morbidity data<br>Lithuania | 0.5 million | Lithuania population, all age groups. Classification of all<br>registered cases causes according to ICD-10 revision codes                                                       | Urban-rural area, age,<br>sex, cardiovascular,<br>respiratory, cancer, and<br>other morbidity by<br>districts                                                        | Social and<br>demographic<br>status                                            |
| Routine<br>mortality data<br>Lithuania | 0.5 million | Lithuania population, all age groups. Classification of all<br>registered cases causes according to ICD-10 revision codes                                                       | Urban-rural area, age,<br>sex, cardiovascular,<br>respiratory, cancer, and<br>other morbidity by<br>districts                                                        | Social and<br>demographic<br>status                                            |
| Detailed<br>Health survey              | 7000        | Representative sample adults of Kaunas citizens, Lithuania                                                                                                                      | General health<br>including<br>Blood pressure, high<br>cholesterol and<br>diabetes, Depression<br>Physical functioning<br>Cognitive function<br>Psychosocial factors | Social economic<br>status<br>Air pollution<br>Physical<br>activities<br>Stress |
| Kaunas birth<br>cohort                 | 4,260       | Kaunas babies and their parents for a subgroup<br><a href="http://www.birthcohorts.net/Cohort.Show.asp?cohortid=87">http://www.birthcohorts.net/Cohort.Show.asp?cohortid=87</a> | Birth weight and<br>gestational age                                                                                                                                  | Social,<br>demographic,<br>economic status<br>Air pollution                    |

Web Table 2. Summary of proposed experimental design in each partner country in PHENOTYPE

|             | Country              | Sample                                       | Summary design                                                                                                                                                                                                                              | Measures |                    |                                                                                |                                                       |                                                                 |
|-------------|----------------------|----------------------------------------------|---------------------------------------------------------------------------------------------------------------------------------------------------------------------------------------------------------------------------------------------|----------|--------------------|--------------------------------------------------------------------------------|-------------------------------------------------------|-----------------------------------------------------------------|
|             |                      |                                              |                                                                                                                                                                                                                                             | Affect   | Cognition          | Physiological                                                                  | Environment                                           | Other                                                           |
| Preventive  | UK: study 1          | Healthy adults (n=40)                        | - Field-based<br>- Within-subjects<br>- 30-minute exposure to natural green, natural green/blue, and urban environment<br>- Measures at baseline (pre-exposure), 30 and 60-minutes post exposure                                            | Mood     | Cognitive function | - Salivary cortisol<br>- HR<br>- HRV<br>- BP                                   | Perceived restoration                                 | RPE<br>Walking speed                                            |
|             | UK: study 2          | Healthy adults (n=40)                        | - Field-based<br>- Between groups<br>- 30-minute exposure to natural <i>or</i> urban environment on three consecutive days<br>- Measures at baseline (day 1), 0, 30 and 60-minutes on exposure days (days 2-4) and final follow-up on day 5 | Mood     | Cognitive function | - Salivary cortisol<br>- HR<br>- HRV<br>- BP                                   | Perceived restoration                                 | RPE<br>Walking speed<br>Hedonic and eudemonic life satisfaction |
|             | Netherlands: study 1 | Healthy adults (n=50)                        | - Laboratory-base<br>- Within subjects<br>- Shown images of natural and urban environment before a stressor (model 1) and after a stressor (model 2) stressor (to explore buffering and restorative effects, respectively)                  | Mood     | Cognitive function | - Salivary cortisol<br>- HR<br>- HRV<br>- BP                                   | Perceived restoration                                 |                                                                 |
|             | Netherlands: study 2 | Healthy adults (n=25)                        | - Laboratory-based<br>- Within subjects<br>- Shown images of natural and urban environment before a stressor (model 1) and after a stressor (model 2) stressor (to explore buffering and restorative effects, respectively)                 | Mood     | Cognitive function | - Neurological response (fMRI)<br>- Salivary cortisol<br>- HR<br>- HRV<br>- BP | Perceived restoration                                 |                                                                 |
| Therapeutic | Spain                | Adults with elevated stress levels (n=20-40) | - Field-based<br>- Exposure to natural green, natural green/blue, and urban environment over several hours<br>- Measures at baseline (pre-exposure), 30 and                                                                                 | Mood     | Cognitive function | - Salivary cortisol<br>- HR<br>- HRV<br>- BP                                   | - Perceived restoration<br>- Air pollution<br>- Noise | RPE<br>Walking speed<br>Social interaction                      |

|  |           |                        |                                                                                                                                                                                                                                                                                                 |      |                    |                                                                                      |                       |                                |
|--|-----------|------------------------|-------------------------------------------------------------------------------------------------------------------------------------------------------------------------------------------------------------------------------------------------------------------------------------------------|------|--------------------|--------------------------------------------------------------------------------------|-----------------------|--------------------------------|
|  |           |                        | 60-minutes post exposure<br>- Participants given CALFIT phones for some days for longer term monitoring (mood, social interaction, physical activity)                                                                                                                                           |      |                    |                                                                                      | pollution             | and physical activity (CALFIT) |
|  | Lithuania | Adults with CAD (n=20) | - Field-based<br>- Between-subjects<br>- 30-minute exposure to natural green <i>or</i> urban environment on two consecutive days (days 2 and 3)<br>- Measures at baseline (pre-exposure), 30 and 60-minutes post exposure<br>- Walking treadmill test at baseline (day 1) and follow-up (day 2) | Mood | Cognitive function | - Exercise capacity (treadmill test)<br>- Salivary cortisol<br>- HR<br>- HRV<br>- BP | Perceived restoration | RPE<br>Walking speed           |

CAD, coronary artery disease; HR, heart rate; HRV, heart rate variability; BP, blood pressure, RPE, rate of perceived exertion; fMRI, functional magnetic resonance imaging

1  
2  
3  
4  
5  
6  
7  
8  
9  
10  
11  
12  
13  
14  
15  
16  
17  
18  
19  
20  
21  
22  
23  
24  
25  
26  
27  
28  
29  
30  
31  
32  
33  
34  
35  
36  
37  
38  
39  
40  
41  
42  
43  
44  
45  
46  
47  
48  
49  
50  
51  
52  
53  
54  
55  
56  
57  
58  
59  
60

For peer review only
