# Supplementary material for: P ositive h ealth e ffects of the n atural o utdoor environment in ty pical p opulations in different regions in E urope ( PHENOTYPE ): a study programme protocol
Source: HighWire-hosted journal article supplement (doi:10.1136/bmjopen-2014-004951), 2014-04-01

Web figure 1

**ASSESSMENT OF THE ENVIRONMENT**

**SUSCEPTIBLE GROUPS**

**HEALTH OUTCOME ASSESSMENT**

**HEALTH DATA SOURCES**

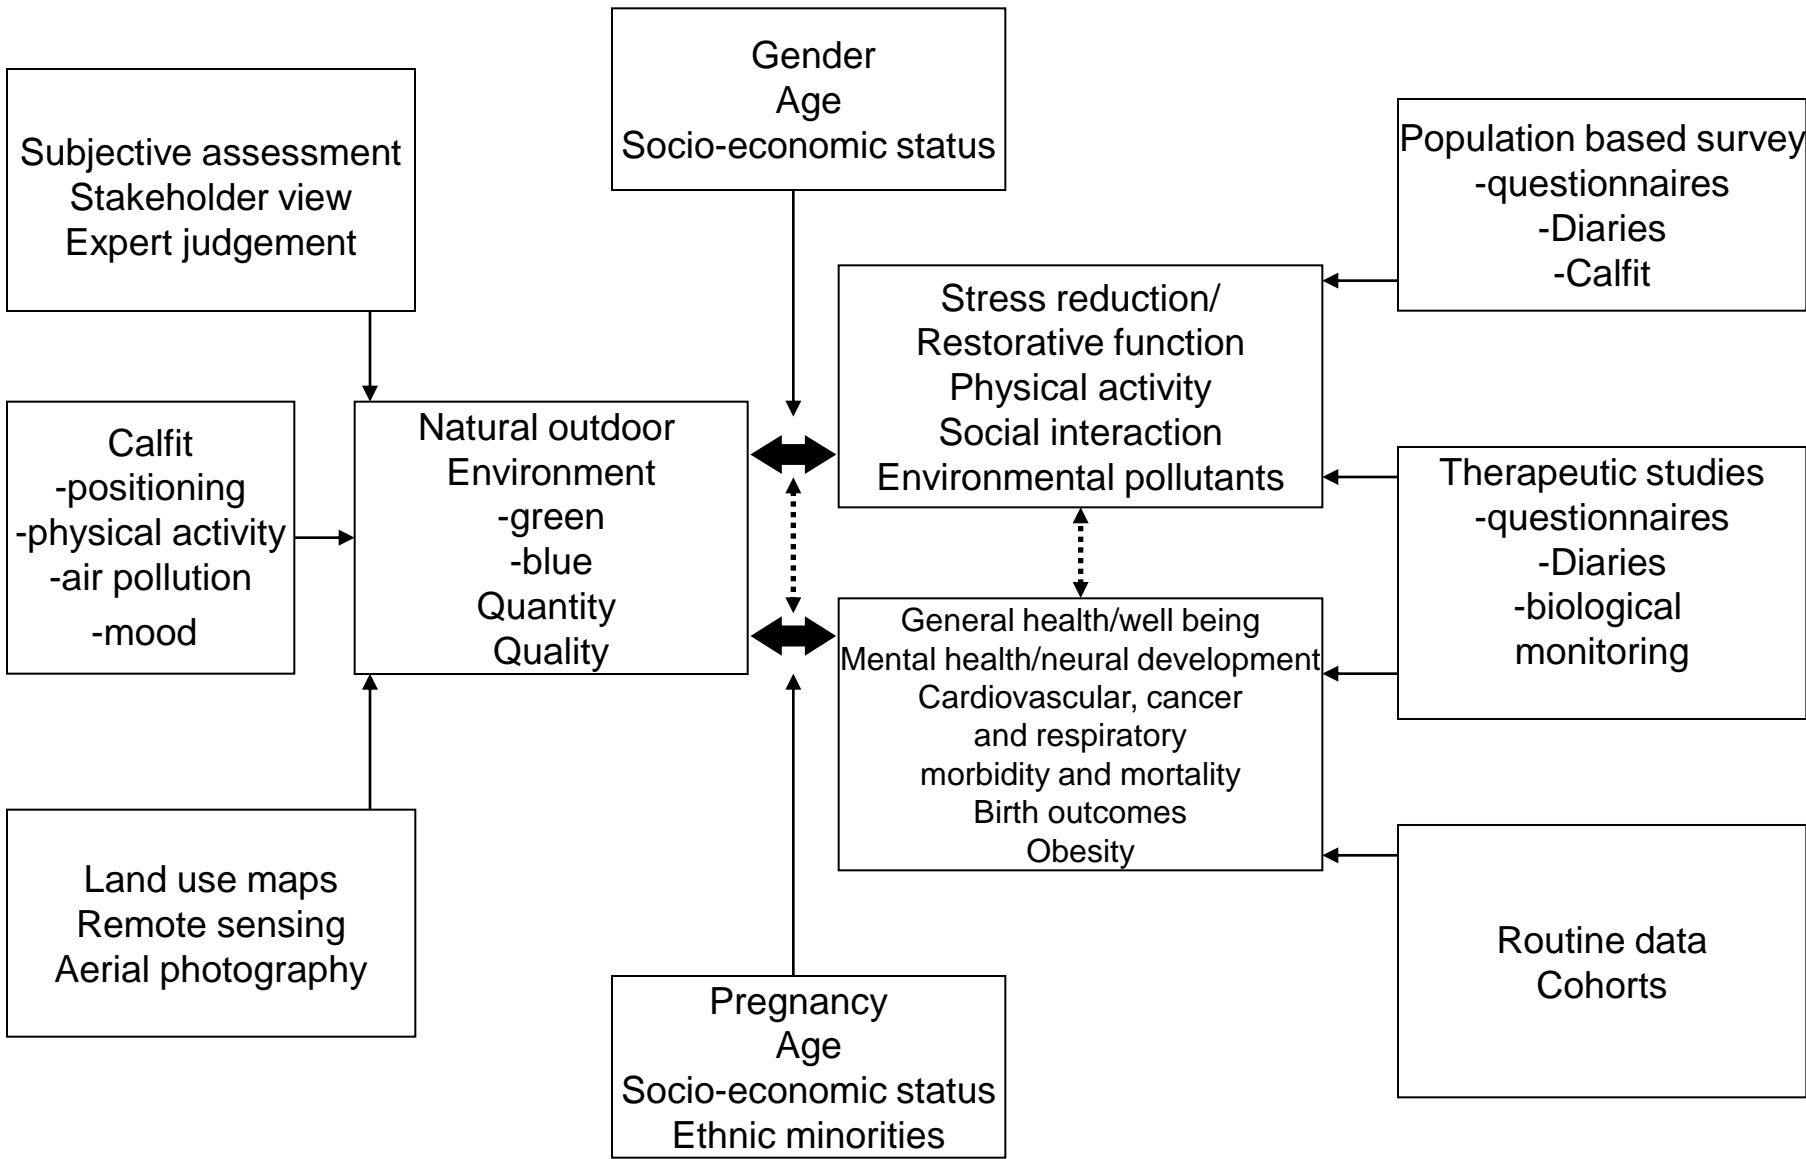

### **Figure Captions**

**Web Figure 1** Natural outdoor environment, mechanisms and health data input in PHENOTYPE

**Web Figure 2** NDVI map of Barcelona and buffers around major green space areas

**Web Figure 3** Mobility pattern for a subject in Barcelona obtained with the Calfit tool

**Web Figure 4** Design of data collection in 4 European case cities to study the underlying mechanism

**Web Figure 5** Stakeholder input and dissemination

Web figure 2

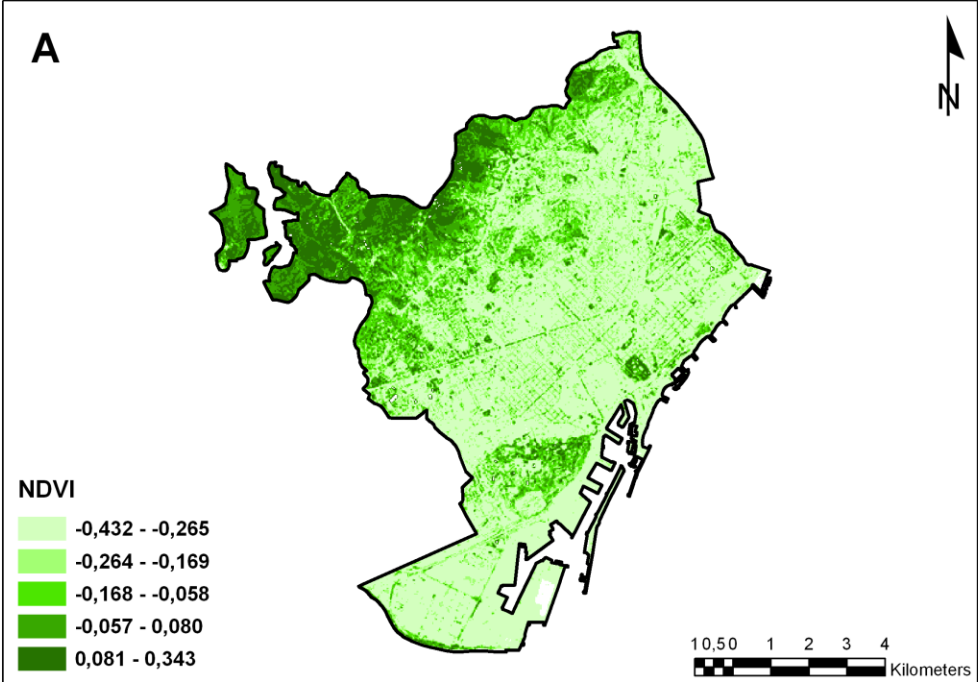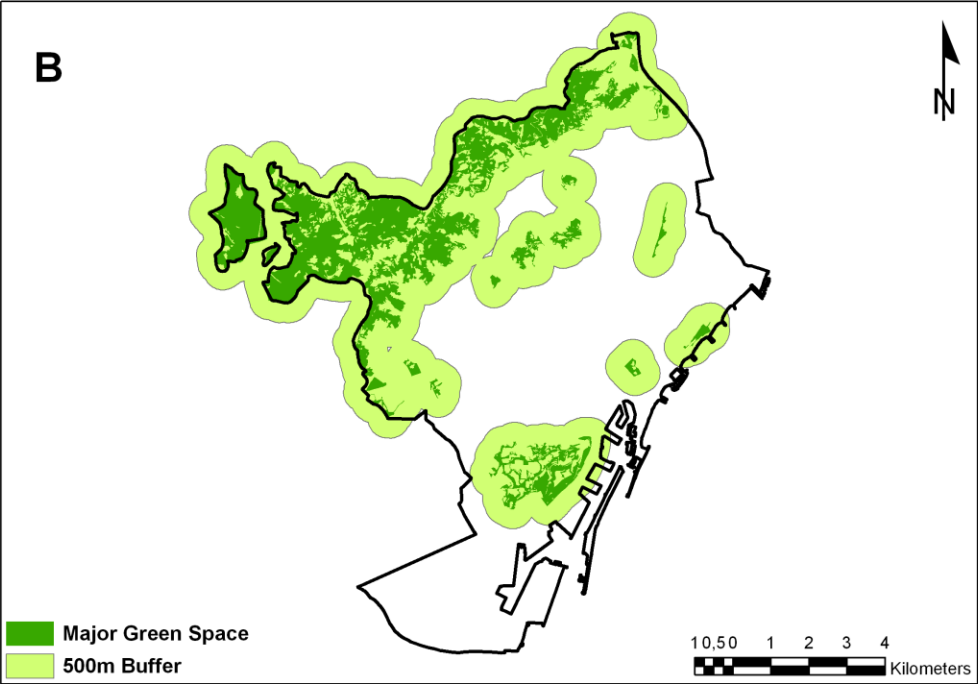

Web figure 3

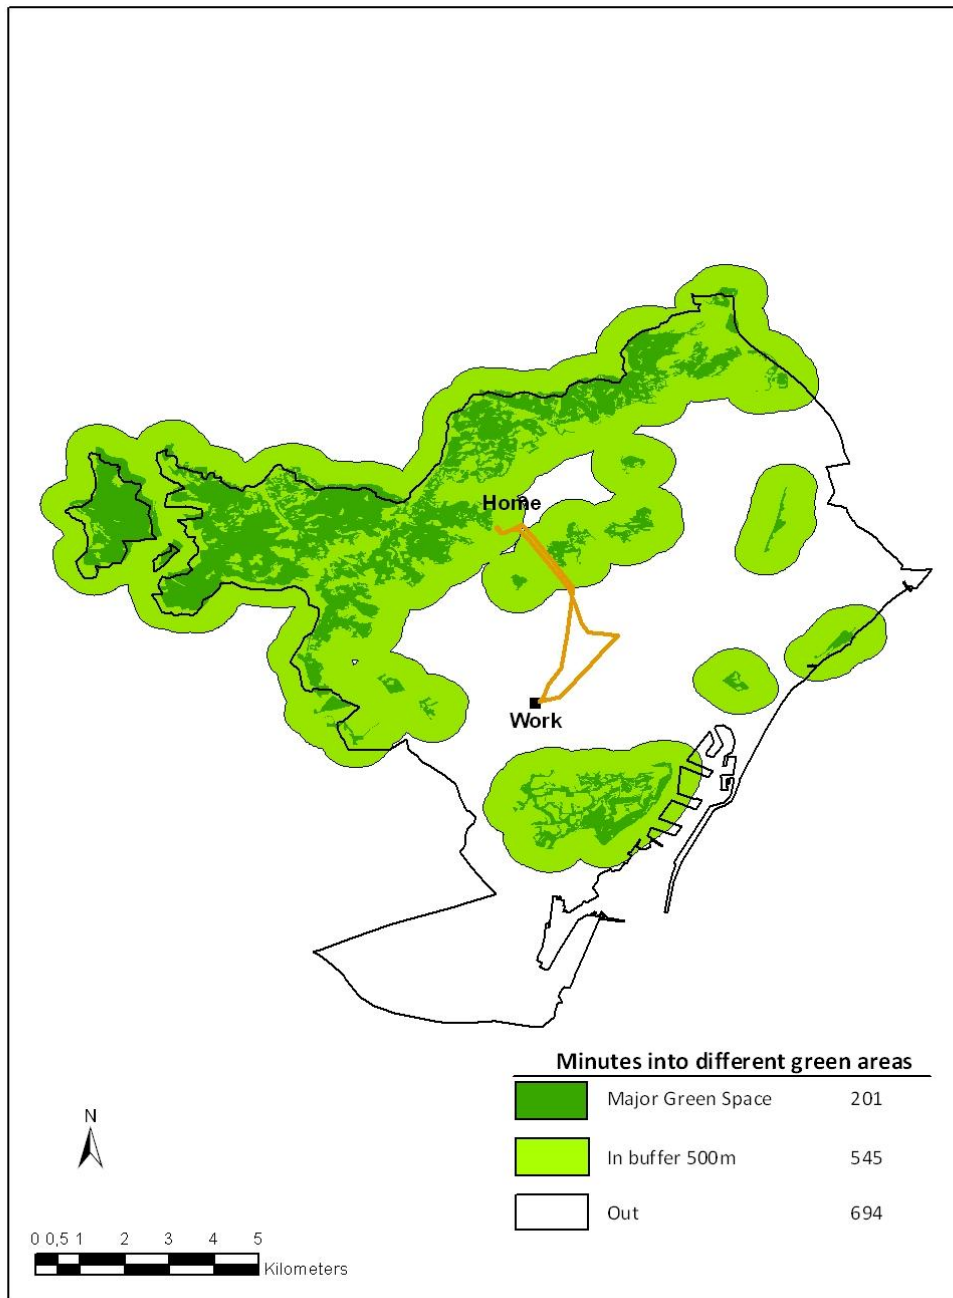

Web figure 4

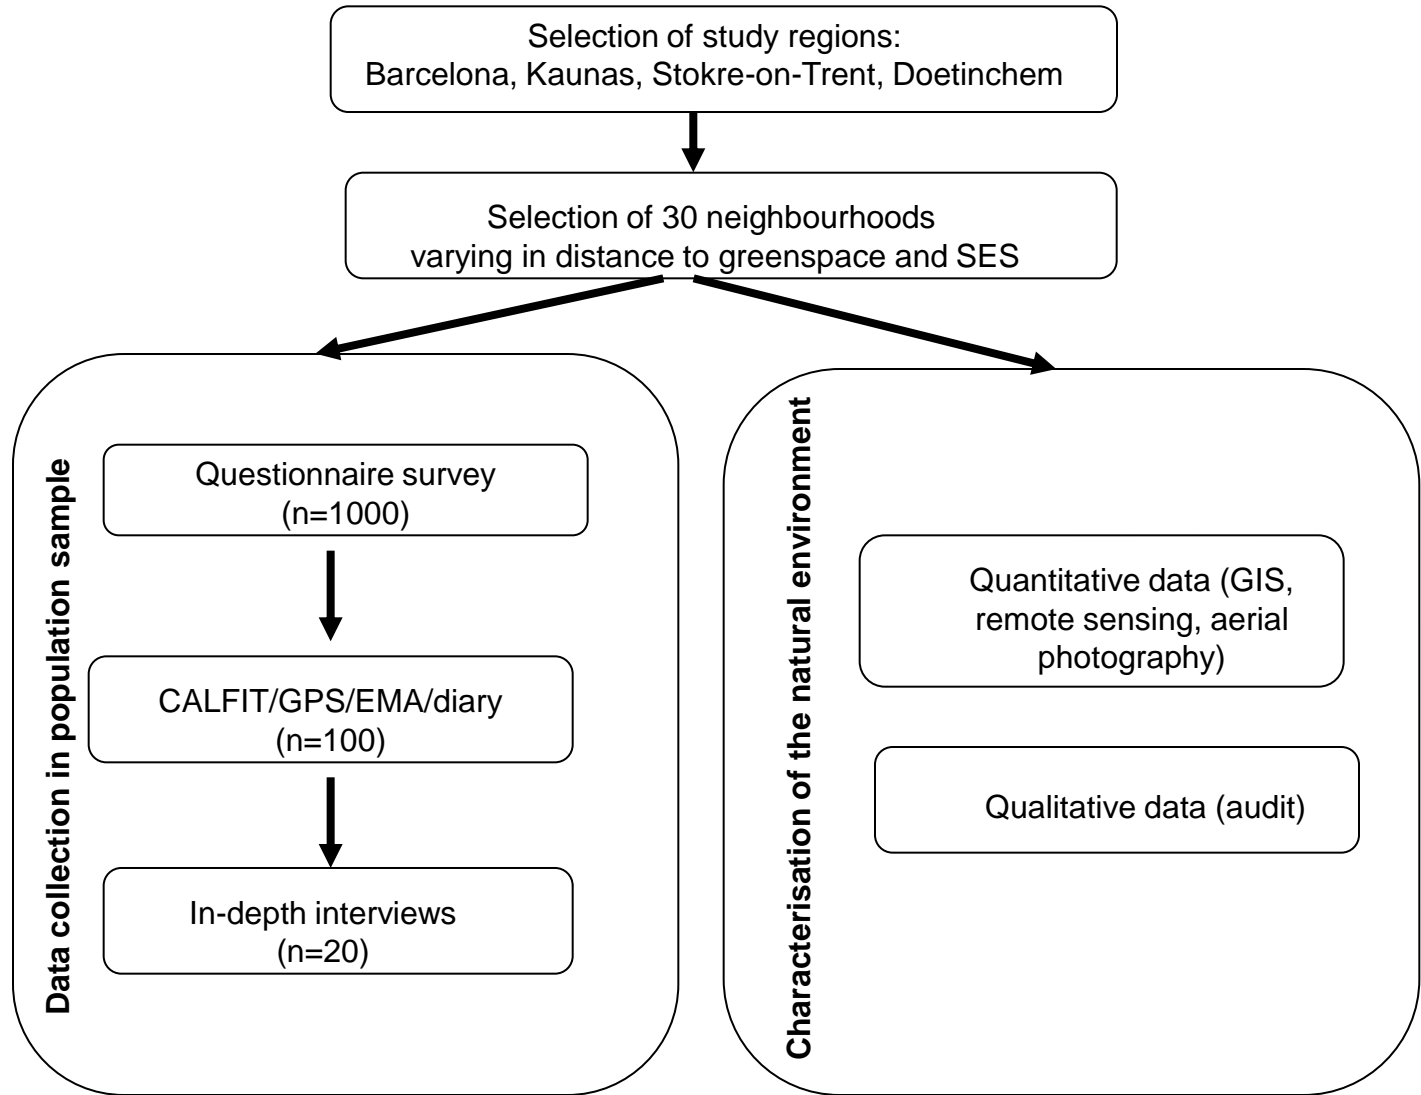

Web figure 5

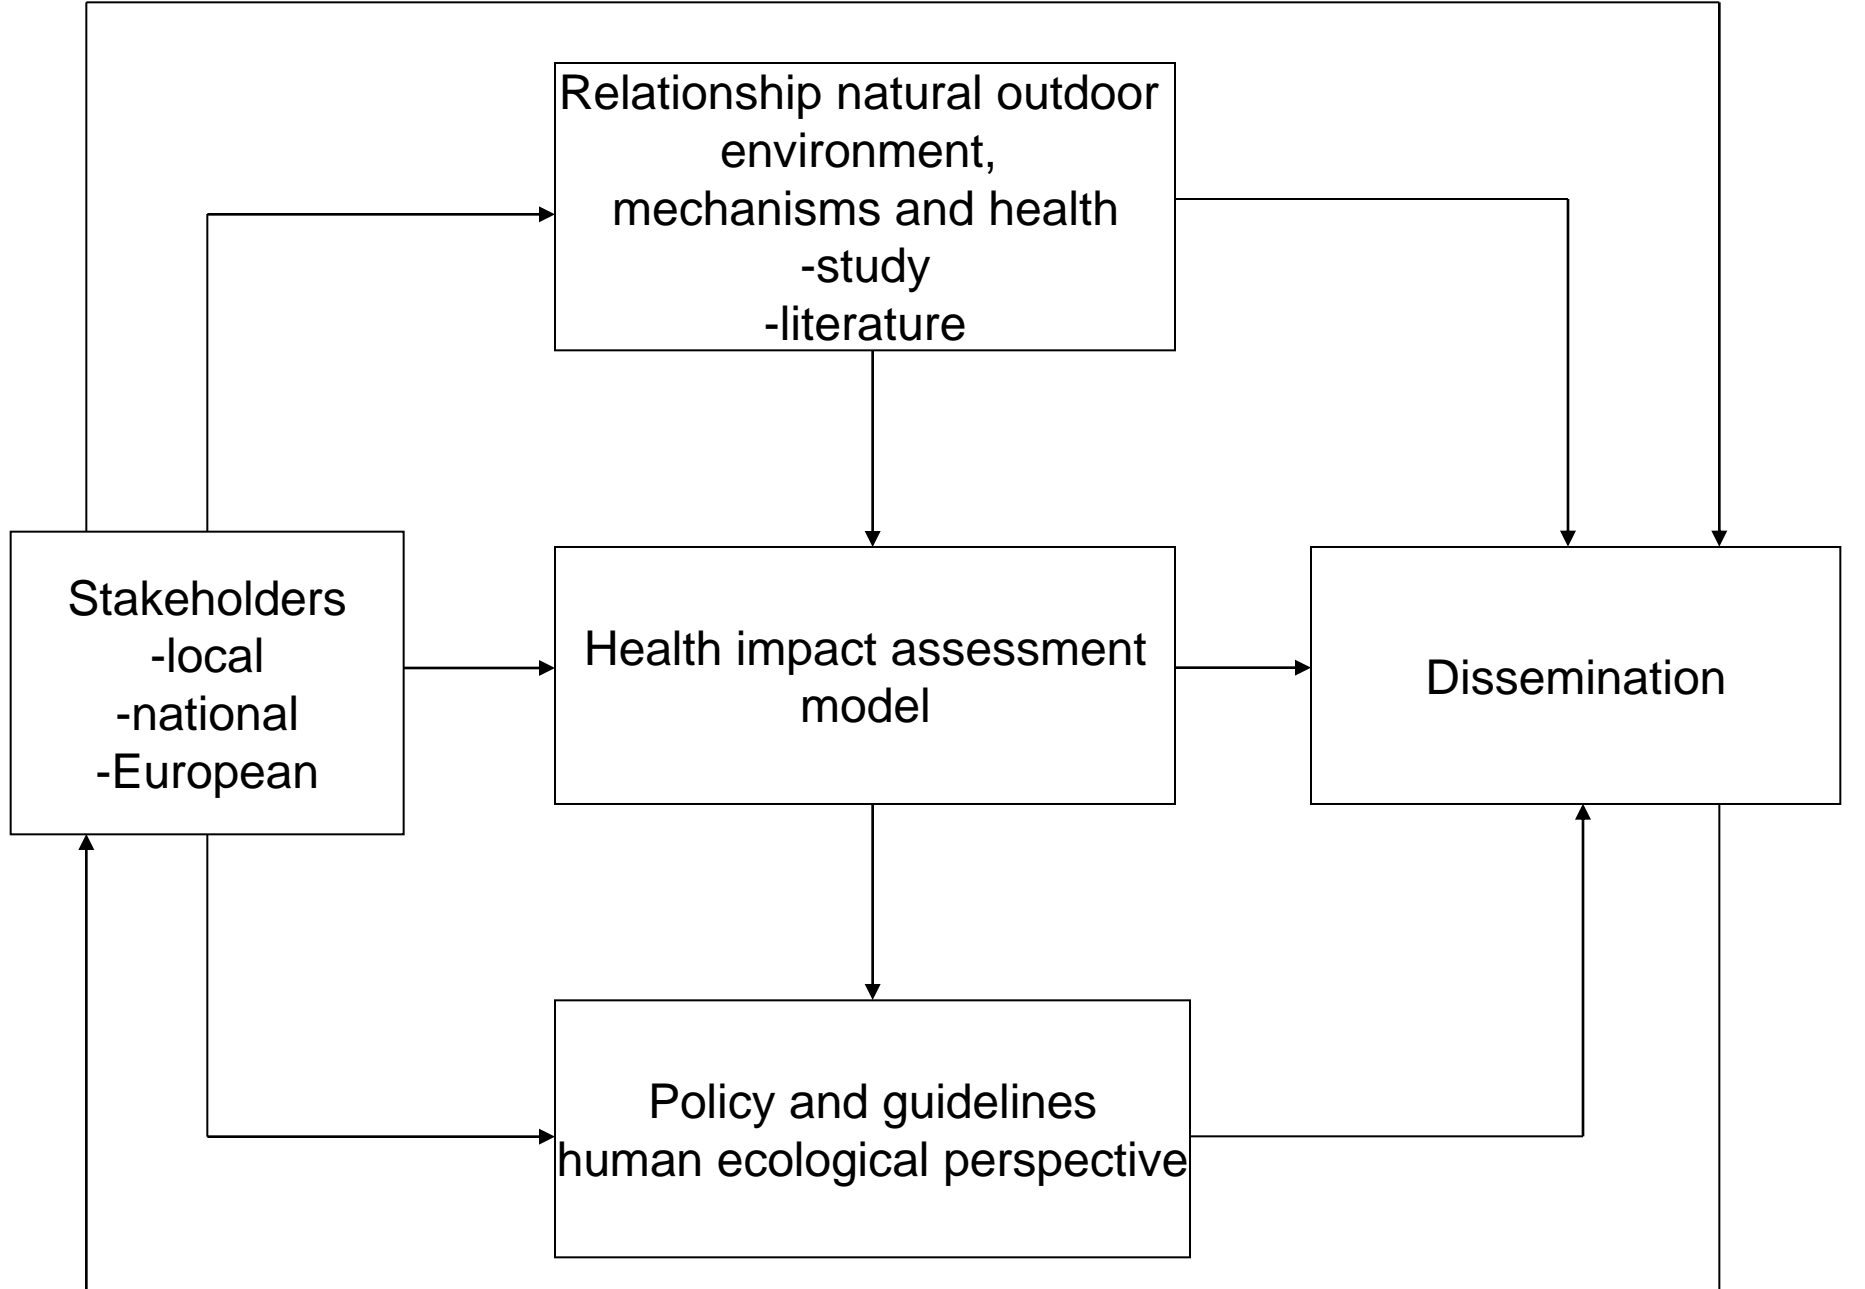

Supplement: bmjopen-2014-004951supp_figures.pdf [file bmjopen-2014-004951supp_figures.pdf]
