# Supplementary material for: P ositive h ealth e ffects of the n atural o utdoor environment in ty pical p opulations in different regions in E urope ( PHENOTYPE ): a study programme protocol
Source: HighWire-hosted journal article supplement (doi:10.1136/bmjopen-2014-004951), 2014-04-01
Supplement: bmjopen-2014-004951supp_tables.pdf [file bmjopen-2014-004951supp_tables.pdf]

**Web Table 1 Currently available databases and cohorts for inclusion in PHENOTYPE**

| Study       | n    | Population                                                     | Collected outcomes                                                                                                                                                                                                    | Relevant covariate and mechanism data                                  |
|-------------|------|----------------------------------------------------------------|-----------------------------------------------------------------------------------------------------------------------------------------------------------------------------------------------------------------------|------------------------------------------------------------------------|
| CREAL Spain |      |                                                                |                                                                                                                                                                                                                       |                                                                        |
| PISCINA     | 3000 | Children 6-9, 2006, Sabadell, Catalonia                        | Respiratory health<br>BMI                                                                                                                                                                                             | Social economic status<br>Physical activity<br>Air pollution           |
| INMA        | 3000 | Children, 2-10, ongoing around Spain                           | Birth weight and gestation, respiratory health, neural development                                                                                                                                                    | Social economic status<br>Physical activity<br>Stress<br>Air pollution |
| PAC-COPD    | 342  | Patients with chronic obstructive pulmonary disease (PAC-CODP) | Hospital admissions<br>All cause and specific mortality<br>Functional data (lung function, cardiovascular function)<br>Symptoms and co-morbidities<br>Quality of life<br>Mental status<br>Body weight and composition | Social economic status<br>Physical activity<br>Air pollution           |
| ECRHS       | 8500 | Adult population in many cities around Europe                  | Respiratory health<br>Short form SF36                                                                                                                                                                                 | Social economic status<br>Physical activity                            |

|                                                  |                                                   |                                                                                                                                                 |                                                                                                             |                                                                     |
|--------------------------------------------------|---------------------------------------------------|-------------------------------------------------------------------------------------------------------------------------------------------------|-------------------------------------------------------------------------------------------------------------|---------------------------------------------------------------------|
|                                                  |                                                   |                                                                                                                                                 |                                                                                                             | Air pollution                                                       |
| Routine data<br>Catalonia                        | Pop 7M<br>0.5 million<br>deaths                   | All, 1999-2006, Catalonia                                                                                                                       | All cause and specific<br>mortality                                                                         | Social economic<br>status                                           |
| Hospital clinic<br>database                      | 16000                                             | Births, 2000-2005 Barcelona                                                                                                                     | Birth weight and<br>gestation                                                                               | Social economic<br>status<br>Air pollution                          |
| Netherlands                                      |                                                   |                                                                                                                                                 |                                                                                                             |                                                                     |
| Cohort of<br>Dutch<br>inhabitants<br>Netherlands | Pop 16M                                           | All, 2000-2008                                                                                                                                  | All cause and specific<br>mortality and morbidity                                                           | Social economic<br>status                                           |
| Doetinchem<br>cohort                             | Approximately<br>5000 over a<br>period of 5 years | See: Verschuren WMM, Blokstra A, Picavet HSJ, Smit HA.<br>The Doetinchem cohort study (cohort profile) Int J Epidemiol<br>2008; 37(6):1236-1241 | Body weight, serum<br>cholesterol, mortality,<br>morbidity, health-<br>related quality of life<br>(RAND-36) | Social economic<br>status, physical<br>activity                     |
| Health survey<br>Utrecht                         | 3475                                              | Adults 3475 (19-99 years)                                                                                                                       | lifestyle, perceived<br>health, chronic diseases                                                            | Socioeconomic<br>status, physical<br>activity                       |
| United<br>Kingdom                                |                                                   |                                                                                                                                                 |                                                                                                             |                                                                     |
| Born in<br>Bradford                              | 12000                                             | Babies, ongoing, England (large ethnic population) and their<br>parents for a subgroup                                                          | Birth weight and<br>gestation<br>General and mental<br>health parents in a<br>subset of 1500                | Social economic<br>status<br>Air pollution<br>Detailed<br>ethnicity |
| Routine<br>hospital                              |                                                   | Small area-level data for Stoke-on-Trent/Staffordshire                                                                                          | Rates and nature of<br>hospital episodes (e.g.,                                                             | Social economic<br>status                                           |

|                                        |             |                                                                                                                                                                                 |                                                                                                                                                                      |                                                                                |
|----------------------------------------|-------------|---------------------------------------------------------------------------------------------------------------------------------------------------------------------------------|----------------------------------------------------------------------------------------------------------------------------------------------------------------------|--------------------------------------------------------------------------------|
| emissions/<br>disease<br>incidence     |             |                                                                                                                                                                                 | respiratory, CVD),<br>morbidity and mortality                                                                                                                        | Air pollution                                                                  |
| National<br>health data                |             | Small area-level health data for UK                                                                                                                                             | Nature and rates of<br>morbidity and mortality                                                                                                                       | Social economic<br>status<br>Air pollution                                     |
|                                        |             |                                                                                                                                                                                 |                                                                                                                                                                      |                                                                                |
| Lithuania                              |             |                                                                                                                                                                                 |                                                                                                                                                                      |                                                                                |
| Routine<br>morbidity data<br>Lithuania | 0.5 million | Lithuania population, all age groups. Classification of all<br>registered cases causes according to ICD-10 revision codes                                                       | Urban-rural area, age,<br>sex, cardiovascular,<br>respiratory, cancer, and<br>other morbidity by<br>districts                                                        | Social and<br>demographic<br>status                                            |
| Routine<br>mortality data<br>Lithuania | 0.5 million | Lithuania population, all age groups. Classification of all<br>registered cases causes according to ICD-10 revision codes                                                       | Urban-rural area, age,<br>sex, cardiovascular,<br>respiratory, cancer, and<br>other morbidity by<br>districts                                                        | Social and<br>demographic<br>status                                            |
| Detailed<br>Health survey              | 7000        | Representative sample adults of Kaunas citizens, Lithuania                                                                                                                      | General health<br>including<br>Blood pressure, high<br>cholesterol and<br>diabetes, Depression<br>Physical functioning<br>Cognitive function<br>Psychosocial factors | Social economic<br>status<br>Air pollution<br>Physical<br>activities<br>Stress |
| Kaunas birth<br>cohort                 | 4,260       | Kaunas babies and their parents for a subgroup<br><a href="http://www.birthcohorts.net/Cohort.Show.asp?cohortid=87">http://www.birthcohorts.net/Cohort.Show.asp?cohortid=87</a> | Birth weight and<br>gestational age                                                                                                                                  | Social,<br>demographic,<br>economic status<br>Air pollution                    |

Web Table 2. Summary of proposed experimental design in each partner country in PHENOTYPE

|             | Country              | Sample                                       | Summary design                                                                                                                                                                                                                              | Measures |                    |                                                                                |                                                       |                                                                 |
|-------------|----------------------|----------------------------------------------|---------------------------------------------------------------------------------------------------------------------------------------------------------------------------------------------------------------------------------------------|----------|--------------------|--------------------------------------------------------------------------------|-------------------------------------------------------|-----------------------------------------------------------------|
|             |                      |                                              |                                                                                                                                                                                                                                             | Affect   | Cognition          | Physiological                                                                  | Environment                                           | Other                                                           |
| Preventive  | UK: study 1          | Healthy adults (n=40)                        | - Field-based<br>- Within-subjects<br>- 30-minute exposure to natural green, natural green/blue, and urban environment<br>- Measures at baseline (pre-exposure), 30 and 60-minutes post exposure                                            | Mood     | Cognitive function | - Salivary cortisol<br>- HR<br>- HRV<br>- BP                                   | Perceived restoration                                 | RPE<br>Walking speed                                            |
|             | UK: study 2          | Healthy adults (n=40)                        | - Field-based<br>- Between groups<br>- 30-minute exposure to natural <i>or</i> urban environment on three consecutive days<br>- Measures at baseline (day 1), 0, 30 and 60-minutes on exposure days (days 2-4) and final follow-up on day 5 | Mood     | Cognitive function | - Salivary cortisol<br>- HR<br>- HRV<br>- BP                                   | Perceived restoration                                 | RPE<br>Walking speed<br>Hedonic and eudemonic life satisfaction |
|             | Netherlands: study 1 | Healthy adults (n=50)                        | - Laboratory-base<br>- Within subjects<br>- Shown images of natural and urban environment before a stressor (model 1) and after a stressor (model 2) stressor (to explore buffering and restorative effects, respectively)                  | Mood     | Cognitive function | - Salivary cortisol<br>- HR<br>- HRV<br>- BP                                   | Perceived restoration                                 |                                                                 |
|             | Netherlands: study 2 | Healthy adults (n=25)                        | - Laboratory-based<br>- Within subjects<br>- Shown images of natural and urban environment before a stressor (model 1) and after a stressor (model 2) stressor (to explore buffering and restorative effects, respectively)                 | Mood     | Cognitive function | - Neurological response (fMRI)<br>- Salivary cortisol<br>- HR<br>- HRV<br>- BP | Perceived restoration                                 |                                                                 |
| Therapeutic | Spain                | Adults with elevated stress levels (n=20-40) | - Field-based<br>- Exposure to natural green, natural green/blue, and urban environment over several hours<br>- Measures at baseline (pre-exposure), 30 and                                                                                 | Mood     | Cognitive function | - Salivary cortisol<br>- HR<br>- HRV<br>- BP                                   | - Perceived restoration<br>- Air pollution<br>- Noise | RPE<br>Walking speed<br>Social interaction                      |

|  |           |                        |                                                                                                                                                                                                                                                                                                 |      |                    |                                                                                      |                       |                                |
|--|-----------|------------------------|-------------------------------------------------------------------------------------------------------------------------------------------------------------------------------------------------------------------------------------------------------------------------------------------------|------|--------------------|--------------------------------------------------------------------------------------|-----------------------|--------------------------------|
|  |           |                        | 60-minutes post exposure<br>- Participants given CALFIT phones for some days for longer term monitoring (mood, social interaction, physical activity)                                                                                                                                           |      |                    |                                                                                      | pollution             | and physical activity (CALFIT) |
|  | Lithuania | Adults with CAD (n=20) | - Field-based<br>- Between-subjects<br>- 30-minute exposure to natural green <i>or</i> urban environment on two consecutive days (days 2 and 3)<br>- Measures at baseline (pre-exposure), 30 and 60-minutes post exposure<br>- Walking treadmill test at baseline (day 1) and follow-up (day 2) | Mood | Cognitive function | - Exercise capacity (treadmill test)<br>- Salivary cortisol<br>- HR<br>- HRV<br>- BP | Perceived restoration | RPE<br>Walking speed           |

CAD, coronary artery disease; HR, heart rate; HRV, heart rate variability; BP, blood pressure; RPE, rate of perceived exertion; fMRI, functional magnetic resonance imaging
